# Supplementary material for: Synthesis of thiazoles from vinyl azides and xanthates under the action of an Mn( iii )-oxidant
Source: Royal Society of Chemistry journal article supplement (doi:10.1039/d5ob01543j), 2025-11-18

## SUPPORTING INFORMATION

### *Synthesis of thiazoles from vinyl azides and xanthates*

#### *under the action of Mn(III)-oxidant*

Lada A. Zaikina, <sup>a, b</sup> Mikhail M. Doronin, <sup>a</sup> Oleg O. Segida, <sup>a</sup> Olga M. Mulina, <sup>a</sup> Igor B. Krylov, <sup>a, b</sup> Liang-Nian He<sup>c</sup> and Alexander O. Terent'ev <sup>\*a, b</sup>

<sup>a</sup> Zelinsky Institute of Organic Chemistry, Russian Academy of Sciences, 47 Leninsky prospect, Moscow, 119991, Russian Federation

<sup>b</sup> Mendeleev University of Chemical Technology of Russia, 9 Miusskaya Square, Moscow 125047, Russian Federation.

<sup>c</sup> *State Key Laboratory and Institute of Elemento-Organic Chemistry, Frontiers Science Center for New Organic Matter, College of Chemistry, Nankai University, Tianjin 300071, P. R. China.*

*e-mail: terentev@ioc.ac.ru*

### **Table of contents**

|                                                                                        |    |
|----------------------------------------------------------------------------------------|----|
| General.....                                                                           | 2  |
| Optimization of the reaction conditions for the synthesis of thiazole <b>3aa</b> ..... | 2  |
| Procedure for synthesis of thiazoles <b>3aa-3oc</b> .....                              | 4  |
| The characterization data of the synthesized thiazoles.....                            | 4  |
| Scale up experiment for synthesis of 2-ethoxy-4-phenylthiazole <b>3ac</b> .....        | 10 |
| Experimental details for control experiments.....                                      | 11 |
| Growth inhibition of the mycelium of the pathogenic fungi by thiazoles <b>3</b> .....  | 14 |
| References .....                                                                       | 17 |
| NMR spectra of the synthesized compounds .....                                         | 18 |
| HRMS spectra of the synthesized compounds.....                                         | 66 |

## General

NMR spectra were registered on a Bruker Avance II 300 MHz instrument. Chemical shifts were measured relative to residual solvent peaks as an internal standard set to  $\delta$  7.26 and  $\delta$  77.0 ( $\text{CDCl}_3$ ) or  $\delta$  2.50 and  $\delta$  39.0 ( $\text{DMSO-d}_6$ ). HRMS spectra were registered on Bruker maXis mass spectrometer. The TLC analyses were carried out on standard silica gel chromatography plates. The melting points were determined on a Kofler hot-stage apparatus. Column chromatography was performed on silica gel (60-200 mesh). 1,4-Dinitrobenzene, 2,2,6,6-tetramethylpiperidine-1-oxyl (TEMPO),  $\text{Na}_2\text{SO}_4$ ,  $\text{MgSO}_4$ ,  $\text{Na}_2\text{S}_2\text{O}_3$ ,  $\text{Mn}(\text{OAc})_2 \cdot 4\text{H}_2\text{O}$ ,  $\text{Mn}(\text{acac})_3$ ,  $\text{Fe}(\text{ClO}_4)_3 \cdot 8\text{H}_2\text{O}$ ,  $\text{PhI}(\text{OAc})_2$ ,  $\text{H}_2\text{O}_2$  (35% wt in  $\text{Et}_2\text{O}$ ), petroleum ether (PE, 40/70), ethyl acetate (EA), THF, DMSO, MeCN, EtOH, DCM were purchased from commercial sources and were used without further purification. Vinylazides **1a-o**<sup>1</sup> and xanthates **2a-j**<sup>2</sup> synthesized in accordance with the slightly modified literary procedures.

### Optimization of the reaction conditions for the synthesis of thiazole **3aa**

*(Experimental procedure for Table 1, entries 1-5, 8-16)*

To a solution of vinyl azide **1a** (1-1.5 mmol, 145-217 mg) and xanthates **2a** (1-1.5 mmol, 174-261 mg) in 10 ml of THF-DMSO (1:1), DMSO, THF- $\text{H}_2\text{O}$  (1:1), MeCN- $\text{H}_2\text{O}$  (1:1), DMF-MeCN (1:1), DMF- $\text{H}_2\text{O}$  (1:1) or MeCN-DMSO (1:1),  $\text{Mn}(\text{OAc})_3 \cdot 2\text{H}_2\text{O}$  (0.5-1.5 mmol, 134-402 mg) was added, and the mixture was stirred at 0-40°C for 30 min. The reaction mixture was transferred to a separation funnel and diluted with water (50 ml). The aqueous layer was extracted with ethyl acetate (5×10 ml). The combined organic layer was washed with brine (10 ml), dried over  $\text{Na}_2\text{SO}_4$ , filtered, and concentrated under reduced pressure. The yield of **3aa** was determined by  $^1\text{H}$  NMR using 1,4-dinitrobenzene as an internal standard.

*(Experimental procedure for Table 1, entries 6,7)*

To a solution of vinyl azide **1a** (1 mmol, 145 mg) and xanthates **2a** (1 mmol, 174 mg) in 10 ml of EtOH- $\text{H}_2\text{O}$  (1:1), or EtOH,  $\text{Mn}(\text{OAc})_3 \cdot 2\text{H}_2\text{O}$  (1 mmol, 268 mg) was added, and the mixture was stirred at 20°C for 30 min. The reaction mixture was transferred to a separation funnel and diluted with water (50 ml). The aqueous layer was extracted with ethyl acetate (5×10 ml). The combined organic layer was washed with

brine (10 ml), dried over Na<sub>2</sub>SO<sub>4</sub>, filtered, and concentrated under reduced pressure. The yield of **3aa** was determined by <sup>1</sup>H NMR using 1,4-dinitrobenzene as an internal standard.

*(Experimental procedure for Table 1, entries 17-20)*

To a solution of vinyl azide **1a** (1 mmol, 145 mg) and xanthates **2a** (1.5 mmol, 261 mg) in 10 ml of MeCN-DMSO (1:1) Mn(acac)<sub>3</sub>, Fe(ClO<sub>4</sub>)<sub>3</sub>·8H<sub>2</sub>O, H<sub>2</sub>O<sub>2</sub> (35% wt in Et<sub>2</sub>O) or PhI(OAc)<sub>2</sub> (1.5 mmol) was added, and the mixture was stirred at 20°C for 30 min. The reaction mixture was transferred to a separation funnel and diluted with water (50 ml). The aqueous layer was extracted with ethyl acetate (5×10 ml). The combined organic layer was washed with brine (10 ml), dried over Na<sub>2</sub>SO<sub>4</sub>, filtered, and concentrated under reduced pressure. The yield of **3aa** was determined by <sup>1</sup>H NMR using 1,4-dinitrobenzene as an internal standard.

*(Experimental procedure for Table 1, entry 21)*

To a solution of vinyl azide **1a** (1 mmol, 145 mg), xanthates **2a** (1.5 mmol, 261 mg) and Mn(OAc)<sub>3</sub>·2H<sub>2</sub>O (20 mol%, 80 mg) in 10 ml of MeCN-DMSO (1:1) PhI(OAc)<sub>2</sub> (1.5 mmol) was added, and the mixture was stirred at 20°C for 30 min. The reaction mixture was transferred to a separation funnel and diluted with water (50 ml). The aqueous layer was extracted with ethyl acetate (5×10 ml). The combined organic layer was washed with brine (10 ml), dried over Na<sub>2</sub>SO<sub>4</sub>, filtered, and concentrated under reduced pressure. The yield of **3aa** was determined by <sup>1</sup>H NMR using 1,4-dinitrobenzene as an internal standard.

*(Experimental procedure for Table 1, entire 22)*

A solution of vinyl azide **1a** (1 mmol, 145 mg) and xanthates **2a** (1.5 mmol, 261 mg) in 10 ml of MeCN-DMSO (1:1), was stirred at 20°C for 30 min. The reaction mixture was transferred to a separation funnel and diluted with water (50 ml). The aqueous layer was extracted with ethyl acetate (5×10 ml). The combined organic layer was washed with brine (10 ml), dried over Na<sub>2</sub>SO<sub>4</sub>, filtered, and concentrated under reduced pressure. The yield of **3aa** was determined by <sup>1</sup>H NMR using 1,4-dinitrobenzene as an internal standard.

## Procedure for synthesis of thiazoles 3aa-3oc

To a solution of vinyl azide **1a-o** (1 mmol) and xanthates **2a-j** (1.5 mmol) in 10 ml of MeCN-DMSO (1:1),  $\text{Mn}(\text{OAc})_3 \cdot 2\text{H}_2\text{O}$  (1.5 mmol, 402 mg) was added, and the mixture was stirred at 20°C for 30 min. The reaction mixture was transferred to a separation funnel and diluted with water (50 ml). The aqueous layer was extracted with ethyl acetate (5×10 ml). The combined organic layer was washed with brine (10 ml), dried over  $\text{Na}_2\text{SO}_4$ , filtered, and concentrated under reduced pressure. Product **3aa-3oc** was isolated by chromatography on  $\text{SiO}_2$  (PE:EA = from 60:1 to 20:1).

## The characterization data of the synthesized thiazoles

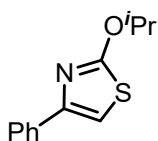

**2-iso-Propoxy-4-phenylthiazole (3aa).**<sup>2</sup> Yellow oil. 149 mg (yield 68%).  $R_f$  = 0.61 (PE:EA 20:1).  $^1\text{H}$  NMR ( $\text{CDCl}_3$ ),  $\delta$ : 7.84 (d,  $J$  = 7.1 Hz, 2H), 7.40 (t,  $J$  = 7.4 Hz, 2H), 7.30 (t,  $J$  = 7.3 Hz, 1H), 6.84 (s, 1H), 5.30 (hept,  $J$  = 6.2 Hz, 1H), 1.47 (d,  $J$  = 6.2 Hz, 6H).  $^{13}\text{C}$  NMR ( $\text{CDCl}_3$ ),  $\delta$ : 173.6, 149.2, 134.9, 128.7, 127.8, 126.0, 104.2, 75.8, 22.0.

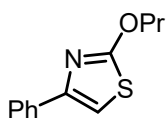

**2-Propoxy-4-phenylthiazole (3ab).**<sup>2</sup> Yellow oil. 166 mg (yield 76%).  $R_f$  = 0.60 (PE:EA 20:1).  $^1\text{H}$  NMR ( $\text{CDCl}_3$ ),  $\delta$ : 7.84 (d,  $J$  = 7.1 Hz, 2H), 7.44-7.36 (m, 2H), 7.34-7.27 (m, 1H), 6.85 (s, 1H), 4.45 (t,  $J$  = 6.6 Hz, 2H), 1.88 (h,  $J$  = 7.3 Hz, 2H), 1.07 (t,  $J$  = 7.4 Hz, 3H).  $^{13}\text{C}$  NMR ( $\text{CDCl}_3$ ),  $\delta$ : 174.3, 149.3, 134.9, 128.7, 127.9, 126.0, 104.4, 73.6, 22.4, 10.5.

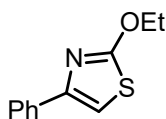

**2-Ethoxy-4-phenylthiazole (3ac).**<sup>2</sup> Yellow oil. 156 mg (yield 76%).  $R_f$  = 0.64 (PE:EA 20:1).  $^1\text{H}$  NMR ( $\text{CDCl}_3$ ),  $\delta$ : 7.84 (d,  $J$  = 7.7 Hz, 2H), 7.40 (d,  $J$  = 15.0 Hz, 2H), 7.30 (t,  $J$  = 7.3 Hz, 1H), 6.85 (s, 1H), 4.56 (q,  $J$  = 7.1 Hz, 2H), 1.48 (t,  $J$  = 7.1 Hz, 3H).  $^{13}\text{C}$  NMR ( $\text{CDCl}_3$ ),  $\delta$ : 174.1, 149.2, 134.8, 128.7, 127.9, 126.0, 104.4, 67.9, 14.6.

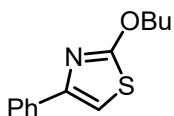

**2-Butoxy-4-phenylthiazole (3ad).**<sup>2</sup> Yellow oil. 177 mg (yield 78%).  $R_f$  = 0.60 (PE:EA 20:1).  $^1\text{H}$  NMR ( $\text{CDCl}_3$ ),  $\delta$ : 7.83 (d,  $J$  = 7.3 Hz, 2H), 7.40 (t,  $J$  = 7.4 Hz, 2H), 7.32-7.28 (m, 1H), 6.85 (s, 1H), 4.50 (t,  $J$  = 6.6 Hz, 2H), 1.89-1.78 (m, 2H), 1.52 (h,  $J$  = 7.4 Hz, 2H), 1.00 (t,  $J$  = 7.4 Hz, 3H).  $^{13}\text{C}$  NMR ( $\text{CDCl}_3$ ),  $\delta$ : 174.3, 149.3, 134.8, 128.7, 127.9, 126.0, 104.4, 71.9, 31.1, 19.2, 13.9.

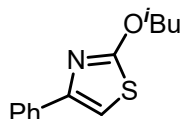

**2-iso-Butoxy-4-phenylthiazole (3ae).** Yellow oil. 210 mg (yield 90%).  $R_f$  = 0.55 (PE:EA 20:1).  $^1\text{H}$  NMR ( $\text{CDCl}_3$ ),  $\delta$ : 7.82 (d,  $J$  = 7.4 Hz, 2H), 7.39 (t,  $J$  = 7.5 Hz, 2H), 7.29 (t,  $J$  = 7.3 Hz, 1H), 6.85 (s, 1H), 4.26 (d,  $J$  = 6.6 Hz, 2H), 2.24-2.11 (m, 1H), 1.05 (d,  $J$  = 6.7 Hz, 6H).  $^{13}\text{C}$  NMR ( $\text{CDCl}_3$ ),  $\delta$ : 135.0, 128.7, 127.9, 126.0, 123.5, 104.5, 71.3, 27.1, 20.8, 14.3. HRMS (ESI)  $m/z$ : calcd for  $\text{C}_{13}\text{H}_{15}\text{NOS}$   $[\text{M}+\text{H}]^+$  234.0947, found 234.0947.

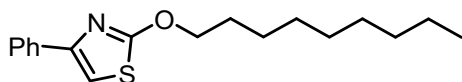

**2-Nonyloxy-4-phenylthiazole (3af).** Yellow oil. 222 mg (yield 73%).  $R_f$  = 0.52 (PE:EA 20:1).  $^1\text{H}$  NMR ( $\text{CDCl}_3$ ),  $\delta$ : 7.83 (d,  $J$  = 7.4 Hz, 2H), 7.39 (t,  $J$  = 7.5 Hz, 2H), 7.29 (t,  $J$  = 7.3 Hz, 1H), 6.85 (s, 1H), 4.48 (t,  $J$  = 6.6 Hz, 2H), 1.89-1.80 (m, 2H), 1.47-1.25 (m, 12H), 0.89 (t,  $J$  = 6.6 Hz, 3H).  $^{13}\text{C}$  NMR ( $\text{CDCl}_3$ ),  $\delta$ : 174.3, 149.3, 134.8, 128.7, 127.9, 126.0, 104.4, 72.2, 32.0, 29.6, 29.4, 29.4, 29.0, 26.0, 22.8, 14.2. HRMS (ESI)  $m/z$ : calcd for  $\text{C}_{18}\text{H}_{25}\text{NOS}$   $[\text{M}+\text{H}]^+$  304.1729, found 304.1730.

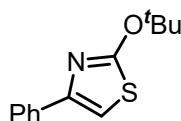

**2-tert-Butoxy-4-phenylthiazole (3ag).** Yellow oil. 49 mg (yield 21%).  $R_f$  = 0.55 (PE:EA 20:1).  $^1\text{H}$  NMR ( $\text{CDCl}_3$ ),  $\delta$ : 7.78 (d,  $J$  = 7.3 Hz, 2H), 7.34 (t,  $J$  = 7.5 Hz, 2H), 7.22 (d,  $J$  = 7.6 Hz, 1H), 6.81 (s, 1H), 1.61 (s, 9H).  $^{13}\text{C}$  NMR ( $\text{CDCl}_3$ ),  $\delta$ : 172.2, 149.3, 135.1, 129.4, 128.7, 127.8, 126.0, 125.0, 104.7, 85.3, 28.3. HRMS (ESI)  $m/z$ : calcd for  $\text{C}_{13}\text{H}_{15}\text{NOS}$   $[\text{M}+\text{H}]^+$  234.0947, found 234.0947.

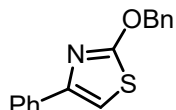

**2-Benzyloxy-4-phenylthiazole (3ah).** Yellow oil. 182 mg (yield 68%).  $R_f$  = 0.49 (PE:EA 20:1).  $^1\text{H}$  NMR ( $\text{CDCl}_3$ ),  $\delta$ : 7.87 (d,  $J$  = 7.9 Hz, 2H), 7.52 (d,  $J$  = 7.3 Hz, 2H), 7.45-7.37 (m, 5H), 7.34 (d,  $J$  = 7.4 Hz, 1H), 6.89 (s, 1H), 5.56 (s, 2H).  $^{13}\text{C}$  NMR ( $\text{CDCl}_3$ ),  $\delta$ :

173.8, 149.1, 135.8, 134.8, 128.8, 128.7, 128.7, 128.6, 128.0, 126.0, 104.9, 73.3. HRMS (ESI)  $m/z$ : calcd for  $C_{16}H_{13}NOS$   $[M+H]^+$  268.0790, found 268.0791.

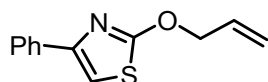

**2-(Allyloxy)-4-phenylthiazole (3ai).** Yellow oil. 178 mg (yield 82%).  $R_f$  = 0.51 (PE:EA 20:1).  $^1H$  NMR ( $CDCl_3$ ),  $\delta$ : 7.84 (d,  $J$  = 7.4 Hz, 2H), 7.40 (d,  $J$  = 15.0 Hz, 1H), 7.32 (d,  $J$  = 7.2 Hz, 1H), 6.87 (s, 1H), 6.14 (ddt,  $J$  = 16.5, 11.2, 5.8 Hz, 1H), 5.49 (d,  $J$  = 17.2 Hz, 1H), 5.35 (d,  $J$  = 10.4 Hz, 1H), 5.02 (d,  $J$  = 5.8 Hz, 2H).  $^{13}C$  NMR ( $CDCl_3$ ),  $\delta$ : 173.7, 149.2, 134.8, 132.1, 128.7, 127.9, 126.0, 119.3, 104.8, 72.2. HRMS (ESI)  $m/z$ : calcd for  $C_{12}H_{11}NOS$   $[M+H]^+$  218.0639, found 218.0634.

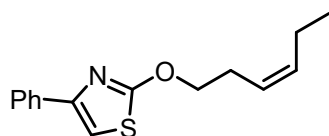

**(Z)-2-(Hex-3-en-1-yloxy)-4-phenylthiazole (3aj).** Yellow oil. 208 mg (yield 80%).  $R_f$  = 0.51 (PE:EA 20:1).  $^1H$  NMR ( $CDCl_3$ ),  $\delta$ : 7.83 (d,  $J$  = 7.3 Hz, 2H), 7.39 (t,  $J$  = 7.4 Hz, 2H), 7.33-7.25 (m, 1H), 6.85 (s, 1H), 5.63-5.51 (m, 1H), 5.48-5.37 (m, 1H), 4.49 (t,  $J$  = 7.0 Hz, 2H), 2.61 (q,  $J$  = 7.0 Hz, 2H), 2.12 (p,  $J$  = 7.1 Hz, 2H), 1.00 (t,  $J$  = 7.5 Hz, 3H).  $^{13}C$  NMR ( $CDCl_3$ ),  $\delta$ : 174.1, 149.2, 135.0, 128.7, 127.9, 126.0, 123.5, 104.5, 71.3, 27.1, 20.8, 14.3. HRMS (ESI)  $m/z$ : calcd for  $C_{15}H_{17}NOS$   $[M+H]^+$  260.1109, found 260.1104.

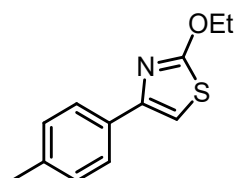

**2-Ethoxy-4-(4-tolyl)thiazole (3bc).**<sup>2</sup> Yellow solid. 173 mg (yield 79%).  $R_f$  = 0.51 (PE:EA 20:1). mp = 50.5-51.2°C (lit.<sup>2</sup> mp = 51.3-52.3°C).  $^1H$  NMR ( $CDCl_3$ ),  $\delta$ : 7.72 (d,  $J$  = 8.1 Hz, 2H), 7.19 (d,  $J$  = 8.0 Hz, 2H), 6.79 (s, 1H), 4.54 (q,  $J$  = 7.1 Hz, 2H), 2.37 (s, 3H), 1.47 (t,  $J$  = 7.1 Hz, 3H).  $^{13}C$  NMR ( $CDCl_3$ ),  $\delta$ : 174.0, 149.4, 137.7, 132.2, 129.4, 125.9, 103.6, 67.9, 21.4, 14.6.

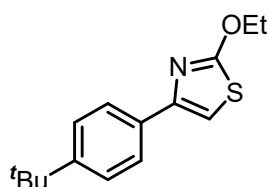

**2-Ethoxy-4-(tert-butylphenyl)thiazole (3cc).** Yellow oil. 209 mg (yield 80%).  $R_f$  = 0.49 (PE:EA 20:1).  $^1H$  NMR ( $CDCl_3$ ),  $\delta$ : 7.75 (d,  $J$  = 8.4 Hz, 2H), 7.41 (d,  $J$  = 8.4 Hz, 2H), 6.80 (s, 1H), 4.55 (q,  $J$  = 7.1 Hz, 2H), 1.48 (t,  $J$  = 7.1 Hz, 3H), 1.34 (s, 9H).  $^{13}C$  NMR

(CDCl<sub>3</sub>),  $\delta$ : 174.0, 150.9, 149.3, 132.1, 125.7, 125.6, 103.7, 67.9, 34.7, 31.4, 14.6. HRMS (ESI)  $m/z$ : calcd for C<sub>15</sub>H<sub>19</sub>NOS [M+H]<sup>+</sup> 262.1260, found 262.1260.

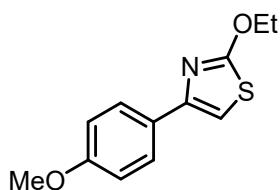

**2-Ethoxy-4-(4-methoxyphenyl)thiazole (3dc).**<sup>2</sup> Yellow solid. 165 mg (yield 70%).  $R_f$  = 0.51 (PE:EA 20:1). mp = 49.4-50.2°C (lit.<sup>2</sup> mp = 49.1-50.0°C). <sup>1</sup>H NMR (CDCl<sub>3</sub>),  $\delta$ : 7.76 (d,  $J$  = 8.8 Hz, 2H), 6.92 (d,  $J$  = 8.8 Hz, 2H), 6.70 (s, 1H), 4.53 (q,  $J$  = 7.1 Hz, 2H), 3.83 (s, 3H), 1.47 (t,  $J$  = 7.1 Hz, 3H). <sup>13</sup>C NMR (CDCl<sub>3</sub>),  $\delta$ : 174.0, 159.5, 149.0, 127.8, 127.2, 114.0, 102.5, 67.8, 55.4, 14.6.

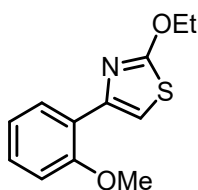

**2-Ethoxy-4-(2-methoxyphenyl)thiazole (3ec).** Yellow oil. 167 mg (yield 71%).  $R_f$  = 0.51 (PE:EA 20:1). <sup>1</sup>H NMR (CDCl<sub>3</sub>),  $\delta$ : 8.17 (dd,  $J$  = 7.7, 1.7 Hz, 1H), 7.35 (s, 1H), 7.26 (dd,  $J$  = 15.6, 1.7 Hz, 1H), 7.03 (t,  $J$  = 7.5 Hz, 1H), 6.96 (d,  $J$  = 8.3 Hz, 1H), 4.54 (q,  $J$  = 7.1 Hz, 2H), 3.93 (s, 3H), 1.47 (t,  $J$  = 7.1 Hz, 3H). <sup>13</sup>C NMR (CDCl<sub>3</sub>),  $\delta$ : 172.4, 157.1, 145.0, 130.1, 128.5, 123.5, 120.9, 111.2, 109.4, 67.6, 55.5, 14.6. HRMS (ESI)  $m/z$ : calcd for C<sub>12</sub>H<sub>13</sub>NO<sub>2</sub>S [M+H]<sup>+</sup> 236.0739, found 236.0740.

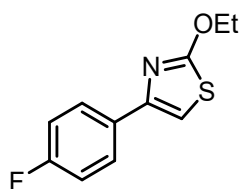

**2-Ethoxy-4-(4-fluorophenyl)thiazole (3fc).**<sup>2</sup> Yellow solid. 183 mg (yield 82%).  $R_f$  = 0.51 (PE:EA 20:1). mp = 55.8-56.6°C (lit.<sup>2</sup> mp = 56.5.3-57.5°C). <sup>1</sup>H NMR (CDCl<sub>3</sub>),  $\delta$ : 7.84-7.70 (m, 2H), 7.07 (t,  $J$  = 8.7 Hz, 2H), 6.77 (s, 1H), 4.54 (q,  $J$  = 7.1 Hz, 2H), 1.47 (t,  $J$  = 7.1 Hz, 3H). <sup>13</sup>C NMR (CDCl<sub>3</sub>),  $\delta$ : 174.2, 162.7 (d,  $J$  = 246.9 Hz), 148.3, 131.1 (d,  $J$  = 3.0 Hz), 127.7 (d,  $J$  = 8.1 Hz), 115.6 (d,  $J$  = 21.7 Hz), 104.0, 68.0, 14.6.

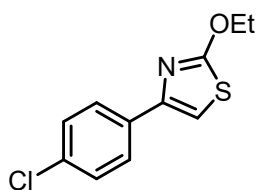

**2-Ethoxy-4-(4-chlorophenyl)thiazole (3gc).**<sup>2</sup> Light yellow solid. 197 mg (yield 81%).  $R_f = 0.51$  (PE:EA 20:1). mp = 60.2-61.4°C (lit.<sup>2</sup> mp = 60.5-61.5°C).  $^1\text{H}$  NMR ( $\text{CDCl}_3$ ),  $\delta$ : 7.75 (d,  $J = 8.6$  Hz, 2H), 7.35 (d,  $J = 8.5$  Hz, 2H), 6.84 (s, 1H), 4.54 (q,  $J = 7.1$  Hz, 2H), 1.47 (t,  $J = 7.1$  Hz, 3H).  $^{13}\text{C}$  NMR ( $\text{CDCl}_3$ ),  $\delta$ : 174.3, 148.2, 133.7, 133.3, 128.9, 127.3, 104.8, 68.1, 14.6.

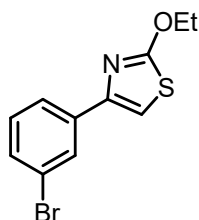

**2-Ethoxy-4-(3-bromophenyl)thiazole (3hc).** Yellow oil. 219 mg (yield 77%).  $R_f = 0.51$  (PE:EA 20:1).  $^1\text{H}$  NMR ( $\text{CDCl}_3$ ),  $\delta$ : 8.03 (s, 1H), 7.77 (d,  $J = 7.7$  Hz, 1H), 7.46 (d,  $J = 7.6$  Hz, 1H), 7.29 (t,  $J = 7.2$  Hz, 1H), 6.91 (s, 1H), 4.60 (q,  $J = 7.0$  Hz, 2H), 1.52 (t,  $J = 7.1$  Hz, 3H).  $^{13}\text{C}$  NMR ( $\text{CDCl}_3$ ),  $\delta$ : 174.2, 147.7, 136.7, 130.7, 130.2, 129.1, 124.4, 122.9, 105.5, 68.0, 14.6. HRMS (ESI)  $m/z$ : calcd for  $\text{C}_{11}\text{H}_{10}\text{BrNOS}$   $[\text{M}+\text{H}]^+$  283.9739, found 283.9739.

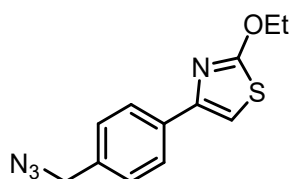

**2-Ethoxy-4-(4-(azidomethyl)phenyl)thiazole (3ic).** Yellow oil. 177 mg (yield 68%).  $R_f = 0.51$  (PE:EA 20:1).  $^1\text{H}$  NMR ( $\text{CDCl}_3$ ),  $\delta$ : 7.84 (d,  $J = 8.2$  Hz, 2H), 7.34 (d,  $J = 8.1$  Hz, 2H), 6.87 (s, 1H), 4.55 (q,  $J = 7.1$  Hz, 2H), 4.35 (s, 2H), 1.48 (t,  $J = 7.1$  Hz, 3H).  $^{13}\text{C}$  NMR ( $\text{CDCl}_3$ ),  $\delta$ : 174.1, 148.7, 134.9, 128.6, 126.4, 104.9, 67.9, 54.7, 14.6. HRMS (ESI)  $m/z$ : calcd for  $\text{C}_{12}\text{H}_{12}\text{N}_4\text{OS}$   $[\text{M}+\text{H}]^+$  261.0804, found 261.0805.

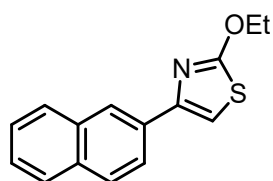

**2-Ethoxy-4-(naphthalen-2-yl)thiazole (3jc).**<sup>2</sup> Yellow oil. 217 mg (yield 85%).  $R_f = 0.51$  (PE:EA 20:1).  $^1\text{H}$  NMR ( $\text{CDCl}_3$ ),  $\delta$ : 8.37 (s, 1H), 7.82-7.92 (m, 4H), 7.45-7.52 (m, 2H), 6.97 (s, 1H), 4.61 (q,  $J = 7.1$  Hz, 2H), 1.52 (t,  $J = 7.1$  Hz, 3H).  $^{13}\text{C}$  NMR ( $\text{CDCl}_3$ ),  $\delta$ : 174.2, 149.2, 133.8, 133.2, 132.1, 128.5, 128.3, 127.8, 126.4, 126.1, 125.1, 123.9, 105.0, 68.1, 14.7.

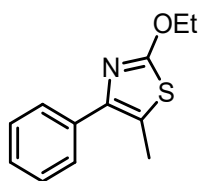

**2-Ethoxy-5-methyl-4-phenylthiazole (3kc).**<sup>2</sup> Yellow oil. 77 mg (yield 35%).  $R_f$  = 0.51 (PE:EA 20:1).  $^1\text{H}$  NMR ( $\text{CDCl}_3$ ),  $\delta$ : 7.62-7.59 (m, 2H), 7.40 (t,  $J$  = 7.4 Hz, 2H), 7.31 (d,  $J$  = 7.3 Hz, 1H), 4.47 (q,  $J$  = 7.1 Hz, 2H), 2.43 (s, 3H), 1.44 (t,  $J$  = 7.1 Hz, 3H).  $^{13}\text{C}$  NMR ( $\text{CDCl}_3$ ),  $\delta$ : 170.2, 144.4, 135.4, 128.5, 128.4, 127.3, 119.5, 67.2, 14.7, 12.8.

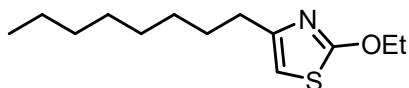

**2-Ethoxy-4-octylthiazole (3lc).** Yellow oil. 198 mg (yield 82%).  $R_f$  = 0.51 (PE:EA 20:1).  $^1\text{H}$  NMR ( $\text{CDCl}_3$ ),  $\delta$ : 6.19 (s, 1H), 4.41 (d,  $J$  = 7.1 Hz, 2H), 2.55 (s, 2H), 1.42 (t,  $J$  = 7.1 Hz, 3H), 1.35-1.22 (m, 12H), 0.87 (t,  $J$  = 6.3 Hz, 4H).  $^{13}\text{C}$  NMR ( $\text{CDCl}_3$ ),  $\delta$ : 173.7, 151.5, 103.4, 67.3, 31.8, 31.6, 29.1, 29.0, 28.8, 28.3, 22.4, 14.2, 13.8. HRMS (ESI)  $m/z$ : calcd for  $\text{C}_{13}\text{H}_{23}\text{NOS}$   $[\text{M}+\text{H}]^+$  242.1569, found 242.1573.

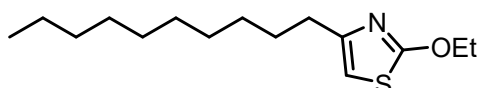

**2-Ethoxy-4-decylthiazole (3mc).** Yellow oil. 197 mg (yield 73%).  $R_f$  = 0.51 (PE:EA 20:1).  $^1\text{H}$  NMR ( $\text{CDCl}_3$ ),  $\delta$ : 6.19 (s, 1H), 4.41 (q,  $J$  = 7.1 Hz, 2H), 2.55 (t,  $J$  = 7.6 Hz, 2H), 1.41 (t,  $J$  = 7.1 Hz, 3H), 1.23-1.26 (m,  $J$  = 11.1 Hz, 16H), 0.85-0.90 (m, 3H).  $^{13}\text{C}$  NMR ( $\text{CDCl}_3$ ),  $\delta$ : 174.1, 151.8, 103.8, 67.7, 32.1, 32.0, 29.7, 29.7, 29.5, 29.4, 29.3, 28.7, 22.8, 14.6, 14.2. HRMS (ESI)  $m/z$ : calcd for  $\text{C}_{15}\text{H}_{27}\text{NOS}$   $[\text{M}+\text{H}]^+$  270.1892, found 270.1886.

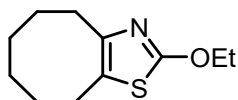

**2-Ethoxy-4,5,6,7,8,9-hexahydrocycloocta[d]thiazole (3nc).**<sup>2</sup> Yellow oil. 148 mg (yield 70%).  $R_f$  = 0.51 (PE:EA 20:1).  $^1\text{H}$  NMR ( $\text{CDCl}_3$ ),  $\delta$ : 4.35 (q,  $J$  = 7.1 Hz, 2H), 2.70-2.64 (m, 4H), 1.68-1.61 (m, 4H), 1.44-1.37 (m, 7H).  $^{13}\text{C}$  NMR ( $\text{CDCl}_3$ ),  $\delta$ : 170.8, 146.6, 121.8, 67.1, 31.3, 29.6, 28.3, 26.2, 25.6, 24.6, 14.6.

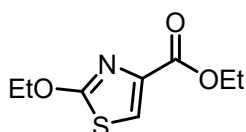

**Ethyl 2-ethoxythiazole-4-carboxylate (3oc).** Yellow oil. 111 mg (yield 55%).  $R_f$  = 0.51 (PE:EA 20:1).  $^1\text{H}$  NMR ( $\text{CDCl}_3$ ),  $\delta$ : 7.55 (s, 1H), 4.55 (q,  $J$  = 7.1 Hz, 2H), 4.35 (q,  $J$  = 7.1 Hz, 2H), 1.39 (dt,  $J$  = 17.0, 7.1 Hz, 6H).  $^{13}\text{C}$  NMR ( $\text{CDCl}_3$ ),  $\delta$ : 174.0, 161.3, 141.3,

120.1, 68.5, 61.3, 14.5, 14.4. HRMS (ESI) m/z: calcd for C<sub>8</sub>H<sub>11</sub>NO<sub>3</sub>S [M+K]<sup>+</sup> 240.0097, found 240.0091.

**Scale up experiment for synthesis of 2-ethoxy-4-phenylthiazole 3ac**

To a solution of vinyl azide **1a** (10 mmol, 1.45 g) and xanthates **2c** (15 mmol, 2.4 g) in 40 ml of MeCN-DMSO (1:1), Mn(OAc)<sub>3</sub>·2H<sub>2</sub>O (15 mmol, 4.02 g) was added, and the mixture was stirred at 20°C for 30 min. The reaction mixture was transferred to a separation funnel and diluted with water (250 ml). The aqueous layer was extracted with ethyl acetate (5×50 ml). The combined organic layer was washed with brine (50 ml), dried over Na<sub>2</sub>SO<sub>4</sub>, filtered, and concentrated under reduced pressure. Product **3aa** was isolated by chromatography on SiO<sub>2</sub> (PE:EA = from 60:1 to 20:1). Yield 65% (1.33 g).

## Experimental details for control experiments

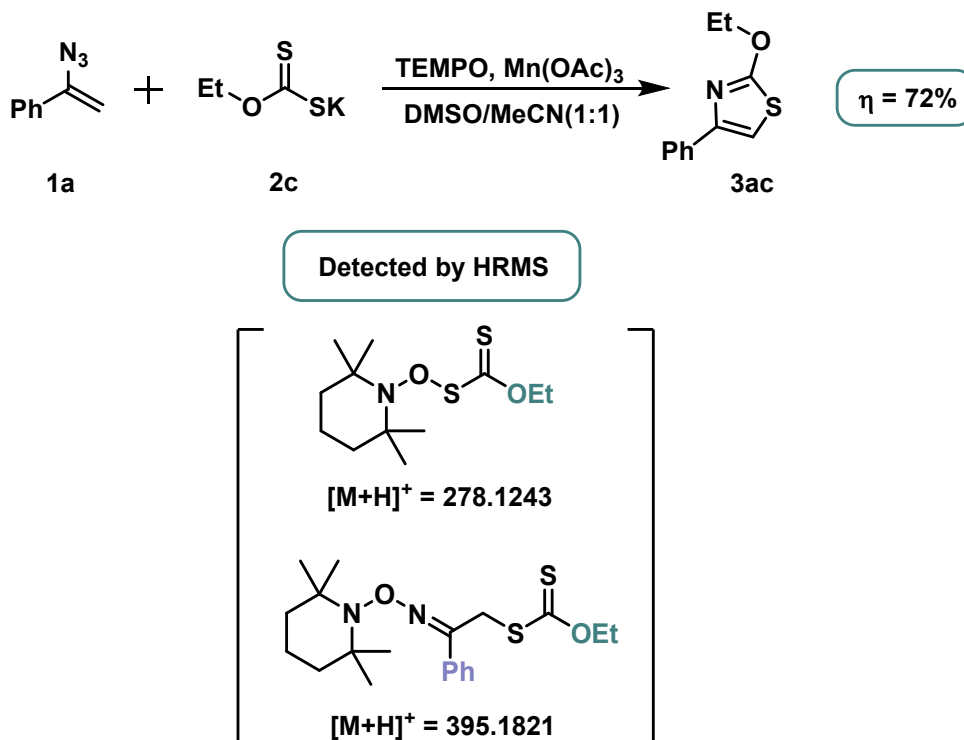

To a solution of vinyl azide **1a** (1 mmol, 145 mg), xanthates **2c** (1.5 mmol, 240 mg) and (2,2,6,6-tetramethylpiperidin-1-yl)oxyl (3 mmol, 469 mg) in 10 ml of MeCN-DMSO (1:1), Mn(OAc)<sub>3</sub>·2H<sub>2</sub>O (1.5 mmol, 402 mg) was added, and the mixture was stirred at 20°C for 30 min. The reaction mixture was transferred to a separation funnel and diluted with water (50 ml). The aqueous layer was extracted with ethyl acetate (5×10 ml). The combined organic layer was washed with brine (10 ml), dried over Na<sub>2</sub>SO<sub>4</sub>, filtered, and concentrated under reduced pressure. The yield of **3ac** was determined by <sup>1</sup>H NMR using 1,4-dinitrobenzene as an internal standard. Additionally, reaction mixture was analyzed as is with HRMS to detect key intermediates.

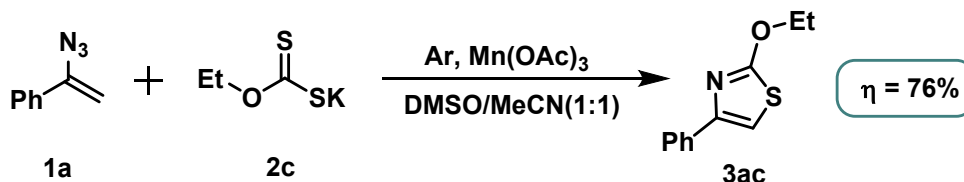

Argon was bubbled through the solution of vinyl azide **1a** (1 mmol, 145 mg) and xanthates **2c** (1.5 mmol, 240 mg) in 10 ml of MeCN-DMSO (1:1), Mn(OAc)<sub>3</sub>·2H<sub>2</sub>O (1.5 mmol, 402 mg) was added, and the mixture was stirred at 20°C for 30 min with argon bubbling. The reaction mixture was transferred to a separation funnel and diluted with water (50 ml). The aqueous layer was extracted with ethyl acetate (5×10 ml). The combined organic layer was washed with brine (10 ml), dried over Na<sub>2</sub>SO<sub>4</sub>, filtered, and

concentrated under reduced pressure. The yield of **3ac** was determined by  $^1\text{H}$  NMR using 1,4-dinitrobenzene as an internal standard.

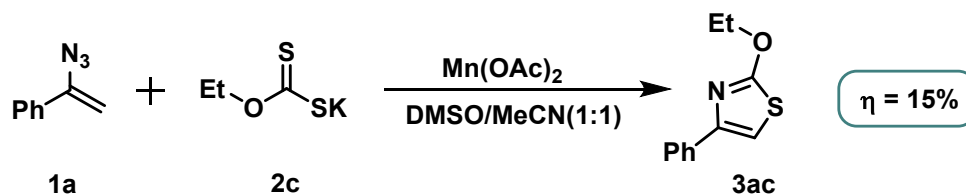

To a solution of vinyl azide **1a** (1 mmol, 145 mg) and xanthates **2c** (1.5 mmol, 240 mg) in 10 ml of MeCN-DMSO (1:1),  $\text{Mn(OAc)}_2 \cdot 4\text{H}_2\text{O}$  (1.5 mmol, 368 mg) was added, and the mixture was stirred at  $20^\circ\text{C}$  for 30 min. The reaction mixture was transferred to a separation funnel and diluted with water (50 ml). The aqueous layer was extracted with ethyl acetate ( $5 \times 10$  ml). The combined organic layer was washed with brine (10 ml), dried over  $\text{Na}_2\text{SO}_4$ , filtered, and concentrated under reduced pressure. The yield of **3ac** was determined by  $^1\text{H}$  NMR using 1,4-dinitrobenzene as an internal standard.

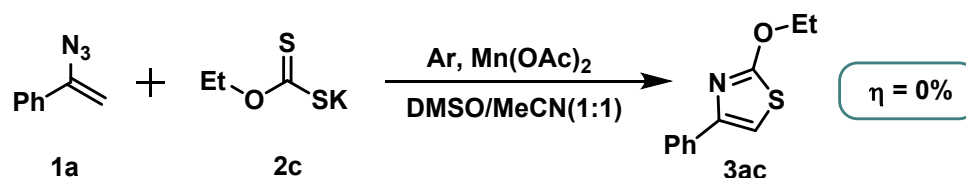

Argon was bubbled through the solution of vinyl azide **1a** (1 mmol, 145 mg) and xanthates **2c** (1.5 mmol, 240 mg) in 10 ml of MeCN-DMSO (1:1),  $\text{Mn(OAc)}_2 \cdot 4\text{H}_2\text{O}$  (1.5 mmol, 368 mg) was added, and the mixture was stirred at  $20^\circ\text{C}$  for 30 min with argon bubbling. The reaction mixture was transferred to a separation funnel and diluted with water (50 ml). The aqueous layer was extracted with ethyl acetate ( $5 \times 10$  ml). The combined organic layer was washed with brine (10 ml), dried over  $\text{Na}_2\text{SO}_4$ , filtered, and concentrated under reduced pressure. The yield of **3ac** was determined by  $^1\text{H}$  NMR using 1,4-dinitrobenzene as an internal standard.

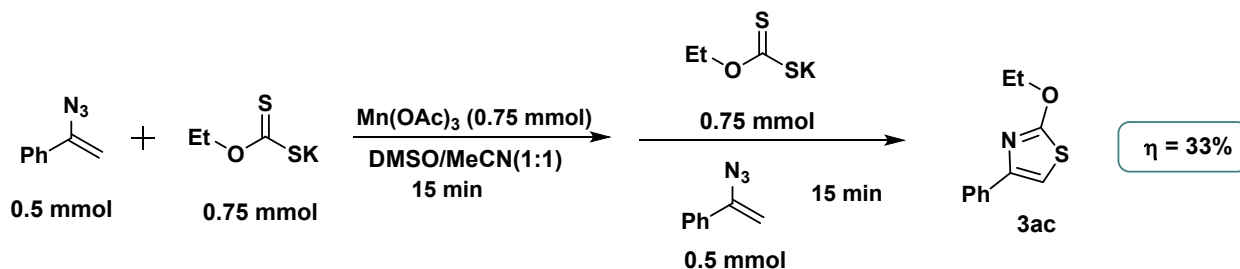

To a solution of vinyl azide **1a** (0.5 mmol, 72.5 mg) and xanthates **2c** (0.75 mmol, 120 mg) in 10 ml of MeCN-DMSO (1:1),  $\text{Mn(OAc)}_3 \cdot 2\text{H}_2\text{O}$  (0.75 mmol, 201 mg) was added, and the mixture was stirred at  $20^\circ\text{C}$  for 15 min. After that, vinyl azide **1a** (0.5 mmol,

72.5 mg) and xanthate **2c** (0.75 mmol, 120 mg) were added to the reaction mixture and it was stirred at 20°C for 15 min. The reaction mixture was transferred to a separation funnel and diluted with water (50 ml). The aqueous layer was extracted with ethyl acetate (5×10 ml). The combined organic layer was washed with brine (10 ml), dried over Na<sub>2</sub>SO<sub>4</sub>, filtered, and concentrated under reduced pressure. The yield of **3ac** was determined by <sup>1</sup>H NMR using 1,4-dinitrobenzene as an internal standard. Additionally, reaction mixture was analyzed as is with HRMS to detect key intermediates.

**Growth inhibition of the mycelium of the pathogenic fungi  
by thiazoles 3**

| №   | Compound                                                                            | <i>Mycelium growth inhibition at 30 mol/L concentration, %</i> |              |              |              |              |              |
|-----|-------------------------------------------------------------------------------------|----------------------------------------------------------------|--------------|--------------|--------------|--------------|--------------|
|     |                                                                                     | <i>V. i.</i>                                                   | <i>R. s.</i> | <i>F. o.</i> | <i>F. m.</i> | <i>B. s.</i> | <i>S. s.</i> |
| *   | <b>Triadimefon</b>                                                                  | <b>70</b>                                                      | <b>59</b>    | <b>64</b>    | <b>86</b>    | <b>71</b>    | <b>71</b>    |
| 3aa | 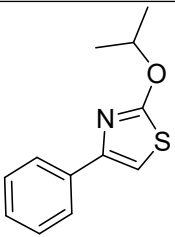   | 69                                                             | 93           | 48           | 78           | 79           | 48           |
| 3ab |    | 15                                                             | 41           | 16           | 45           | 39           | 16           |
| 3ac |   | 79                                                             | 100          | 55           | 90           | 78           | 53           |
| 3ad |  | 61                                                             | 68           | 32           | 66           | 67           | 28           |
| 3ae |  | 75                                                             | 100          | 36           | 59           | 74           | 19           |
| 3af |  | 13                                                             | 30           | 11           | 34           | 45           | 9            |
| 3ag |  | 38                                                             | 65           | 18           | 57           | 45           | 12           |

|     |                                                                                     |     |     |    |    |    |    |
|-----|-------------------------------------------------------------------------------------|-----|-----|----|----|----|----|
| 3ah | 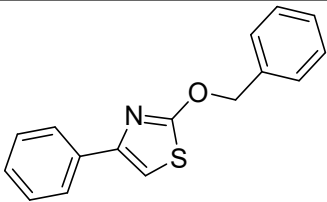   | 28  | 40  | 25 | 61 | 53 | 11 |
| 3aj |    | 28  | 45  | 23 | 53 | 46 | 14 |
| 3bc |    | 75  | 100 | 35 | 71 | 66 | 40 |
| 3cc |    | 28  | 41  | 25 | 66 | 47 | 18 |
| 3dc |  | 80  | 100 | 42 | 86 | 68 | 52 |
| 3ec |  | 74  | 95  | 44 | 75 | 75 | 48 |
| 3fc |  | 100 | 100 | 61 | 86 | 83 | 64 |
| 3gc |  | 34  | 48  | 21 | 45 | 40 | 16 |

|     |                                                                                     |    |     |    |    |    |    |
|-----|-------------------------------------------------------------------------------------|----|-----|----|----|----|----|
| 3hc | 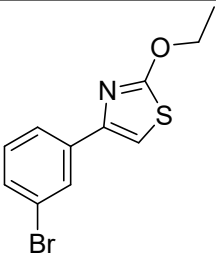   | 44 | 67  | 33 | 70 | 62 | 37 |
| 3ic |    | 56 | 99  | 32 | 58 | 53 | 38 |
| 3jc |    | 30 | 41  | 21 | 53 | 42 | 24 |
| 3kc |    | 79 | 100 | 46 | 73 | 88 | 42 |
| 3lc |  | 28 | 50  | 16 | 35 | 8  | 24 |
| 3mc |  | 24 | 35  | 10 | 34 | 10 | 14 |
| 3nc |  | 56 | 87  | 45 | 72 | 52 | 29 |
| 3oc |  | 30 | 36  | 6  | 26 | 38 | 17 |

## References

1. M. M. Doronin, A. S. Klikushin, O. M. Mulina, M. G. Medvedev, V. A. Vil', L.-N. He and A. O. Terent'ev, *Org. Chem. Front.*, 2025, DOI: 10.1039/D5QO00508F.
2. Z. Zhu, X. Tang, J. Cen, J. Li, W. Wu and H. Jiang, *Chem. Commun.*, 2018, **54**, 3767–3770.

# NMR spectra of the synthesized compounds

## 2-*iso*-Propoxy-4-phenylthiazole (3aa)

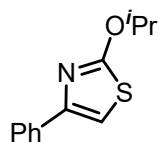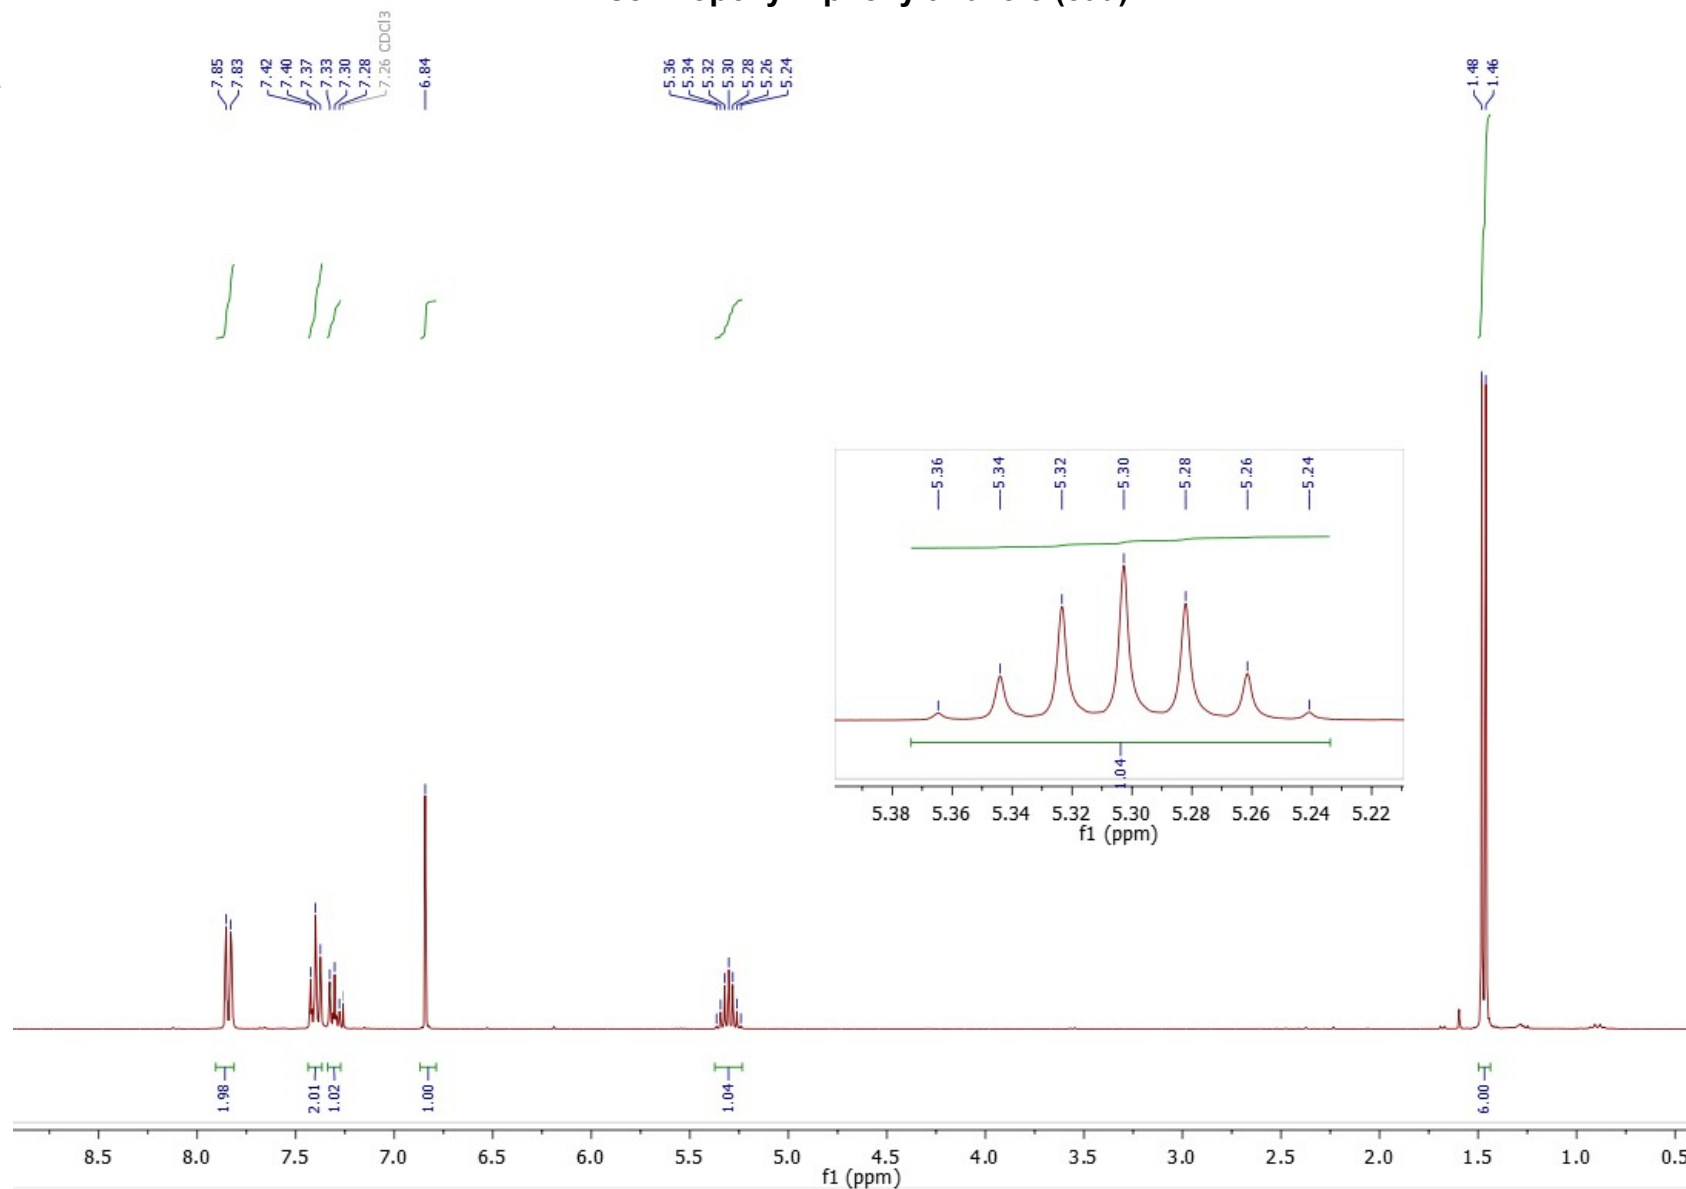

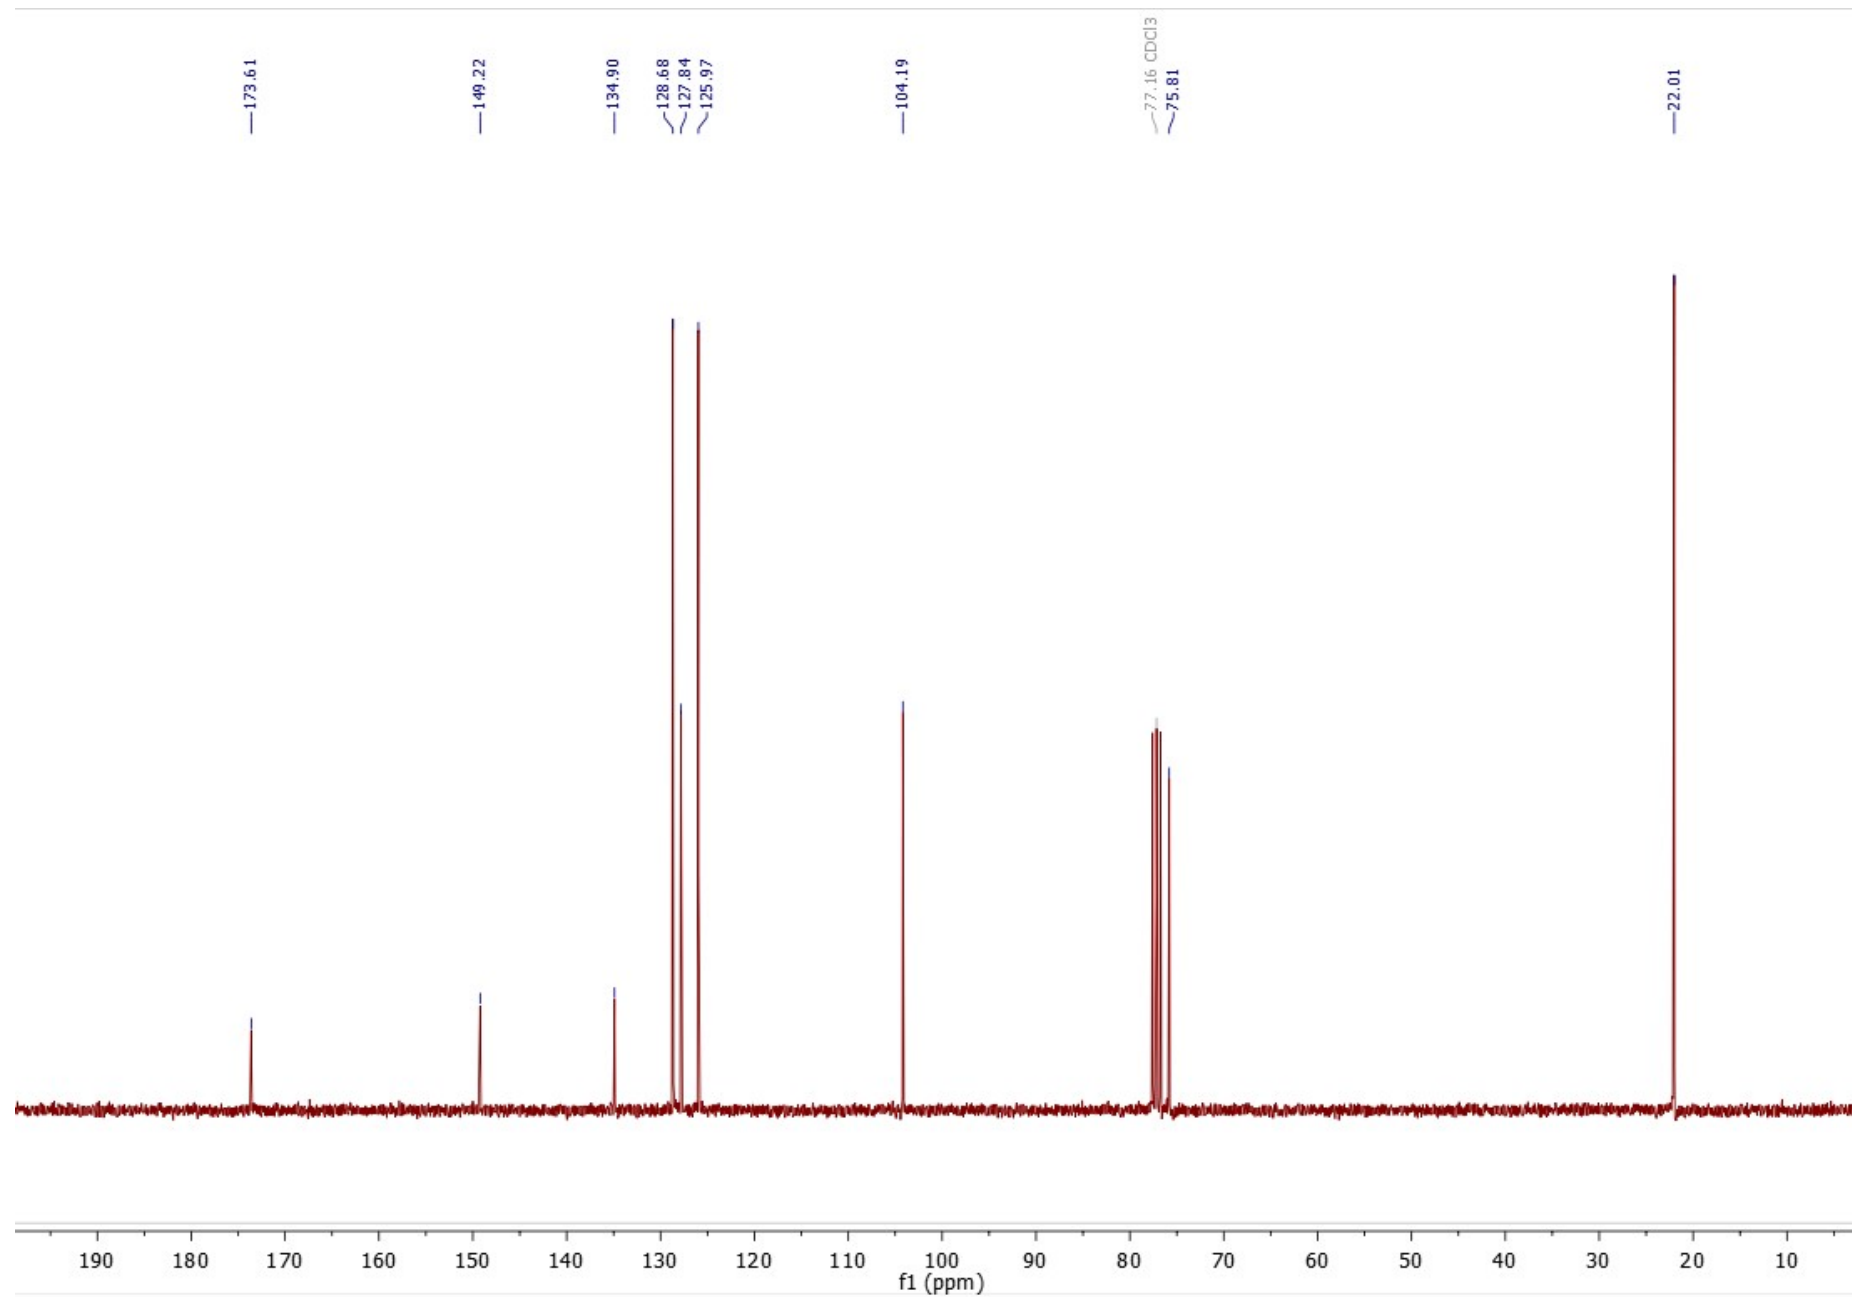

# 2-Propoxy-4-phenylthiazole (3ab)

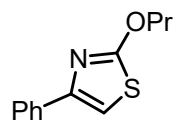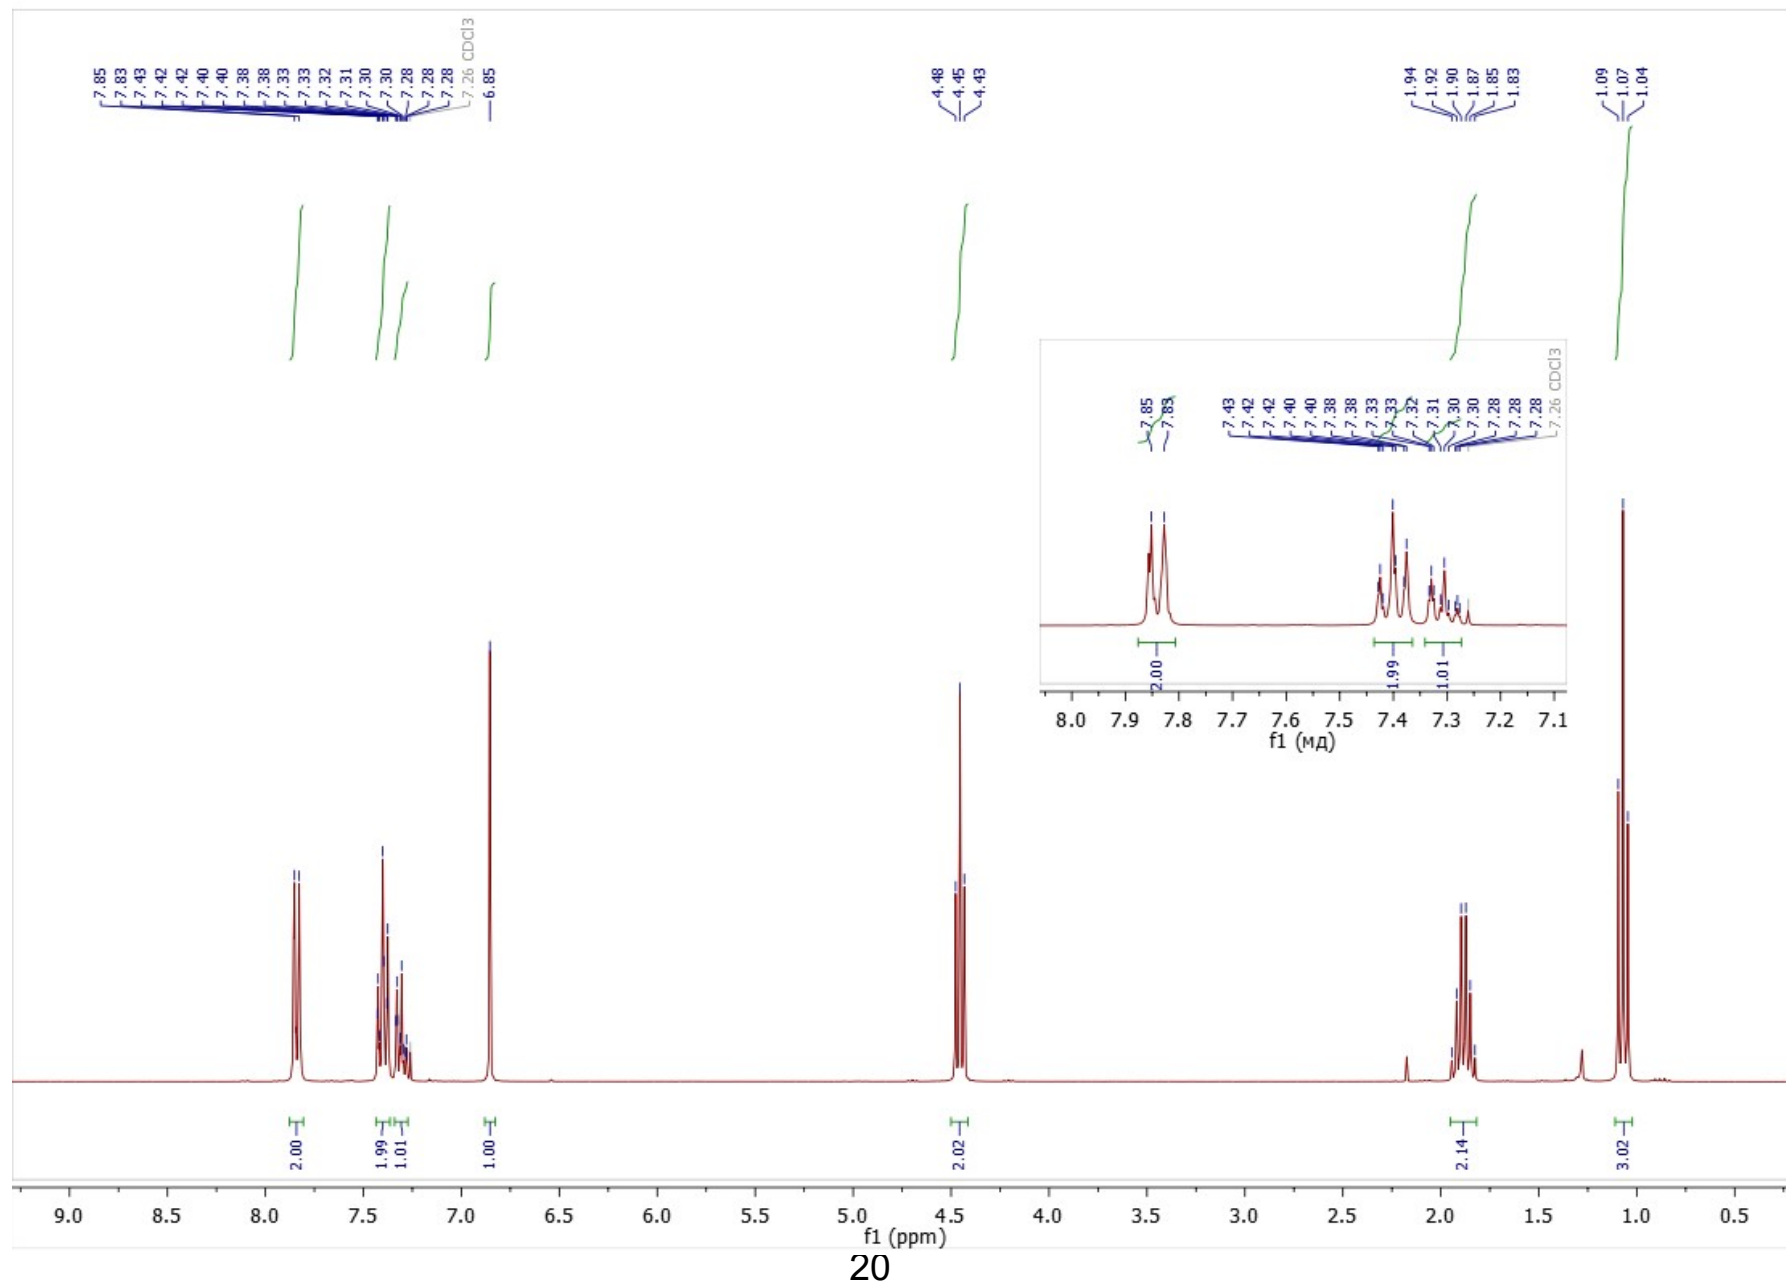

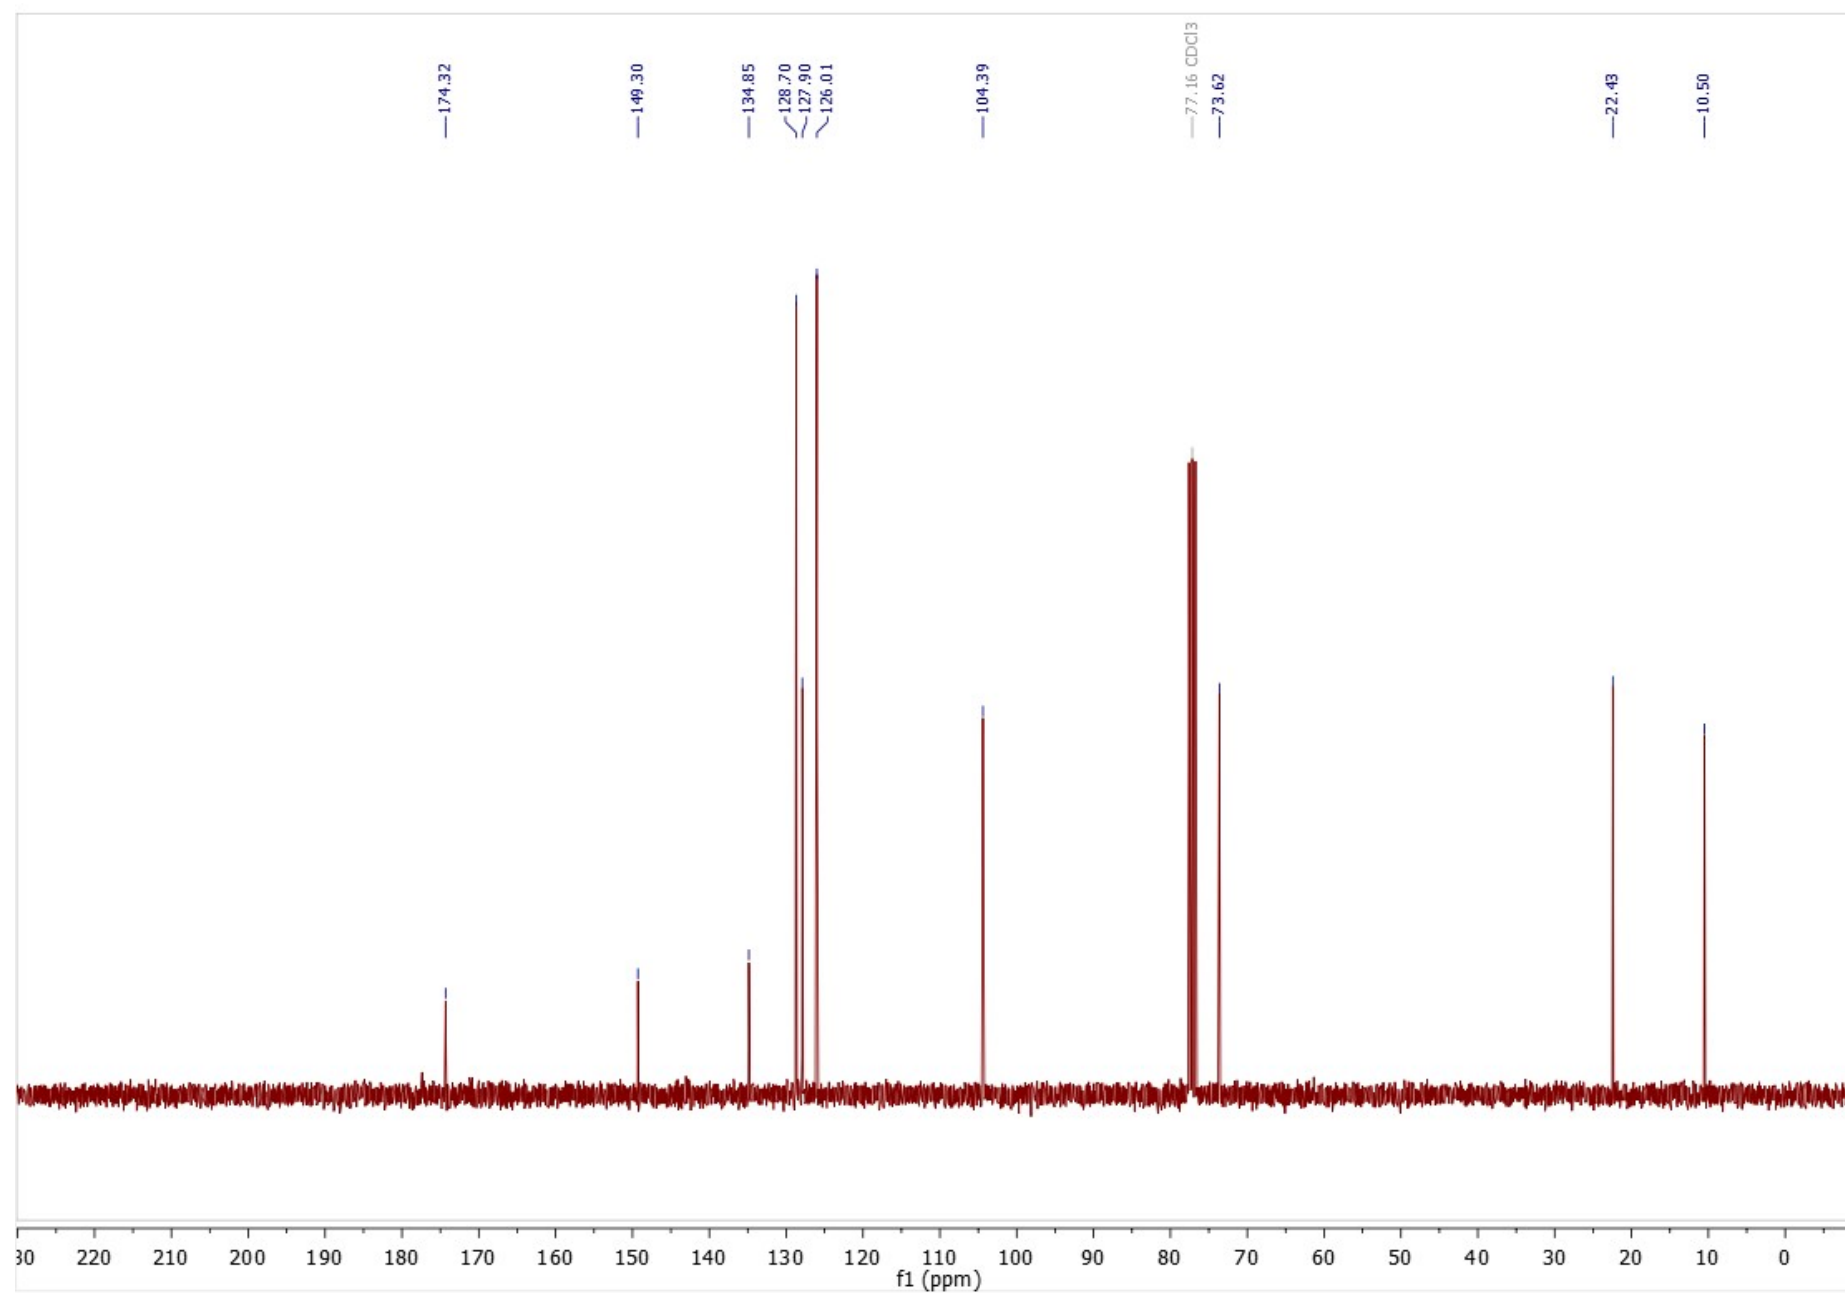

# 2-Ethoxy-4-phenylthiazole (3ac)

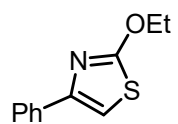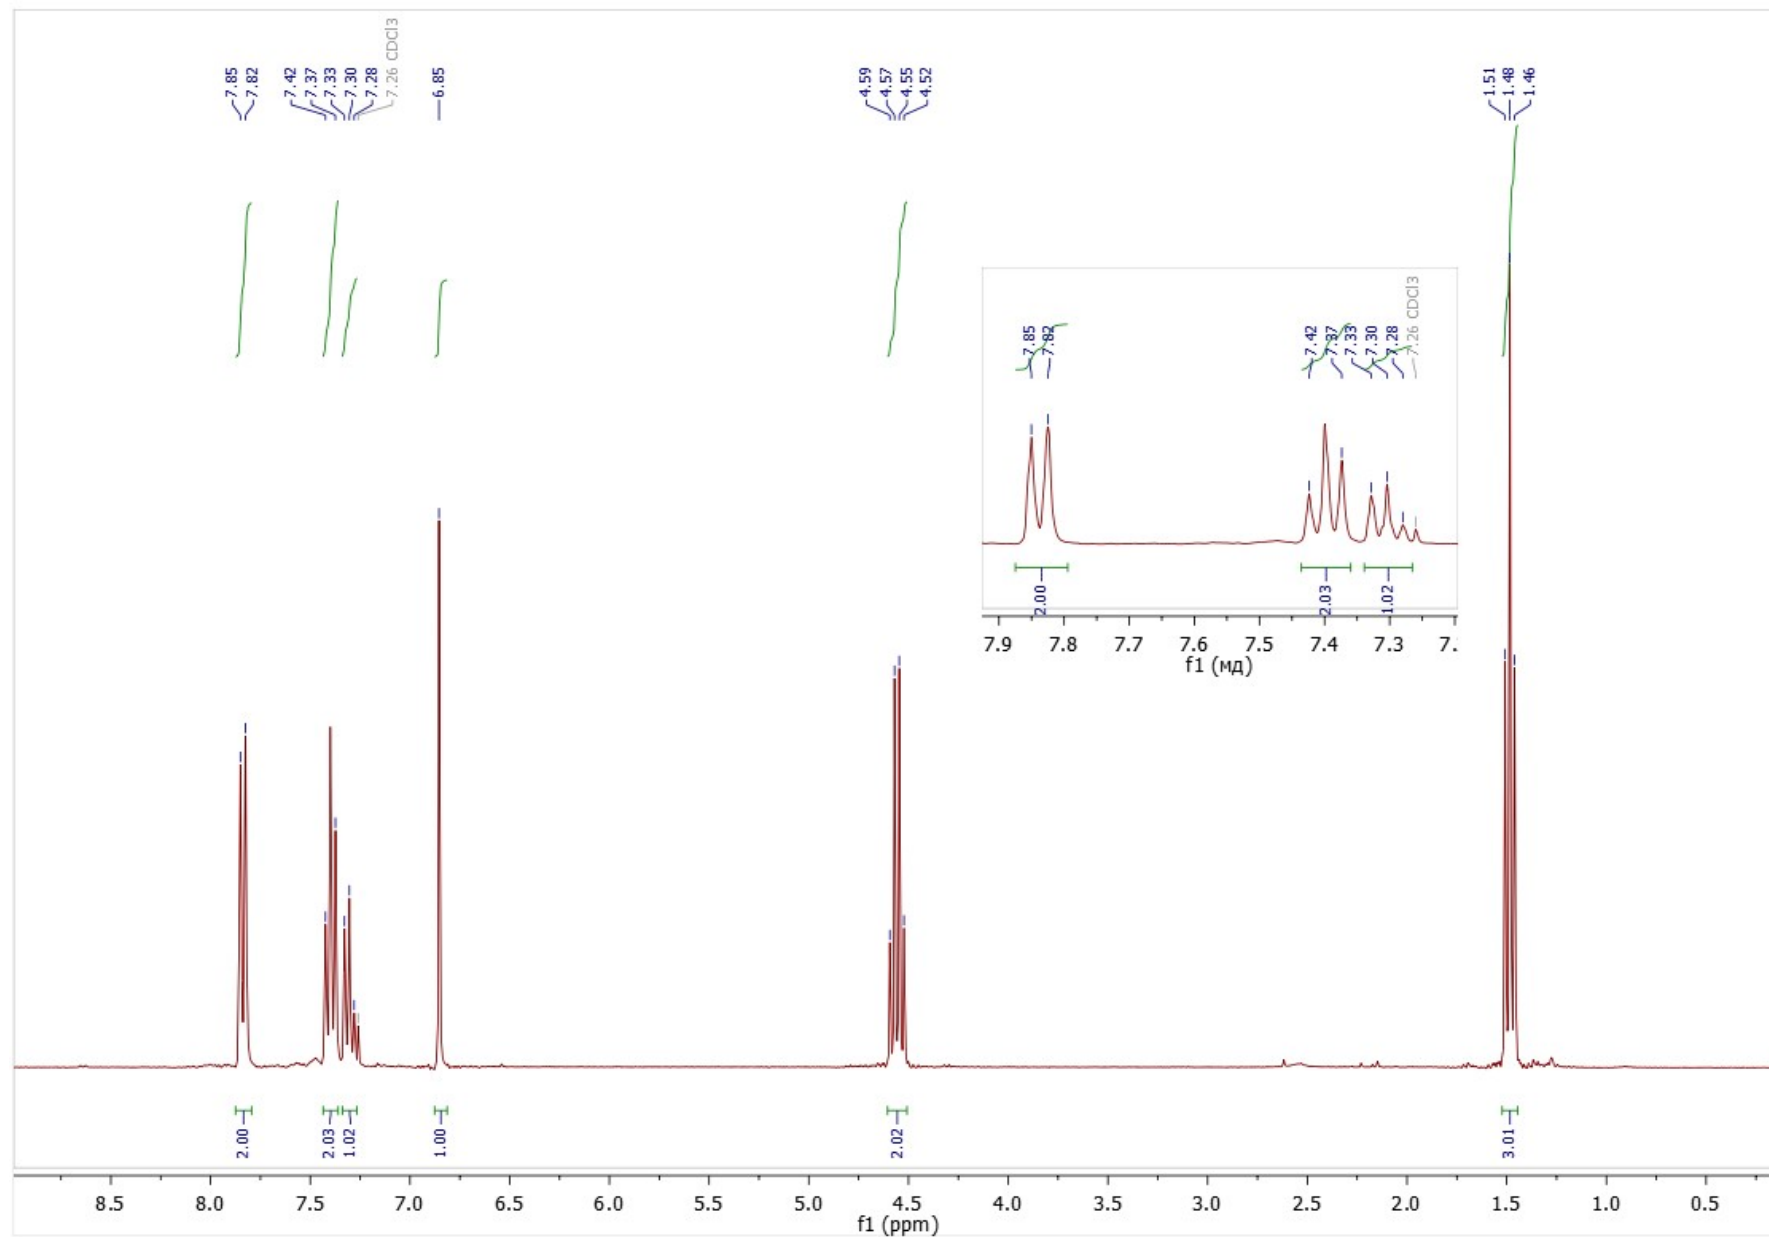

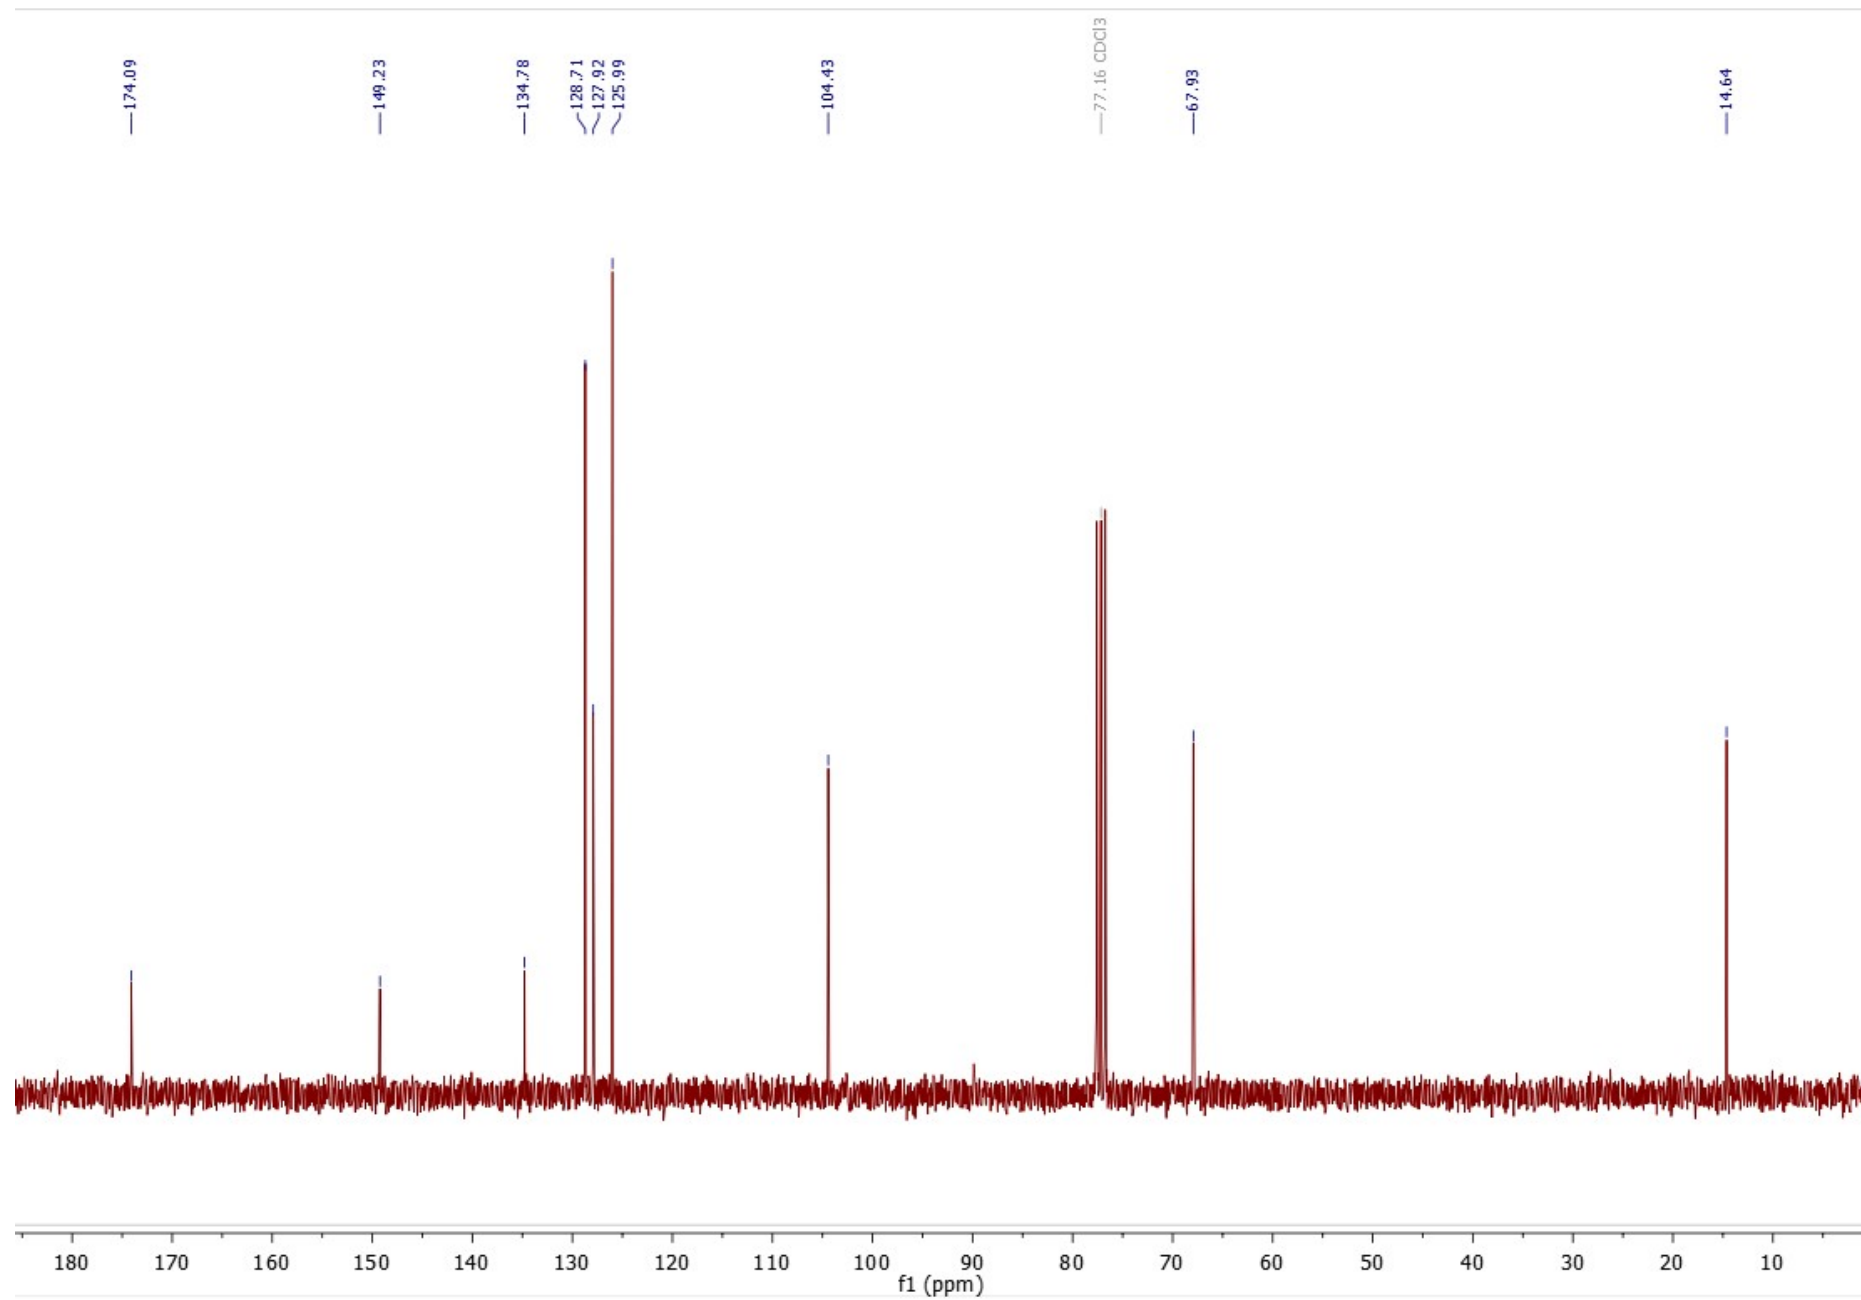

# 2-Butoxy-4-phenylthiazole (3ad)

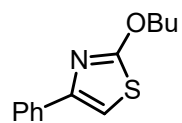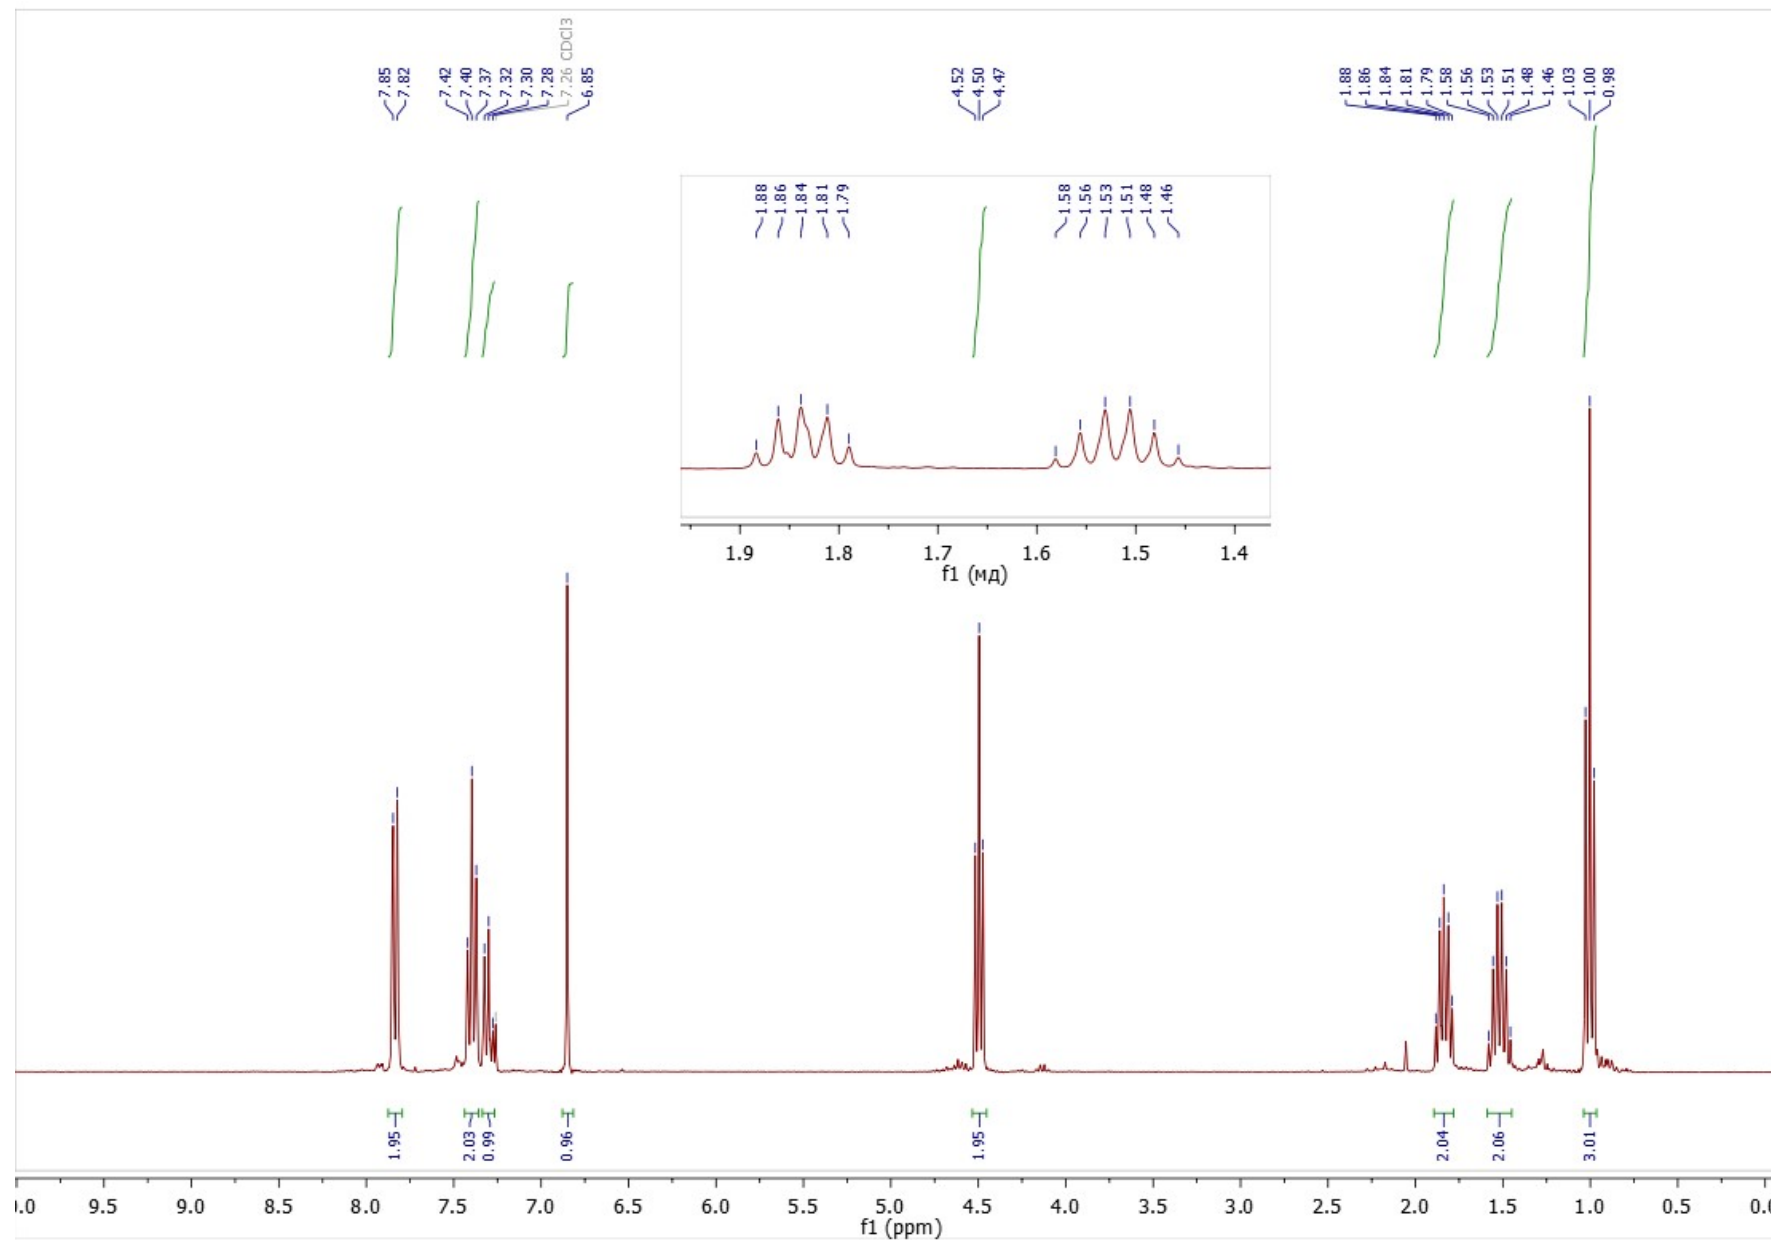

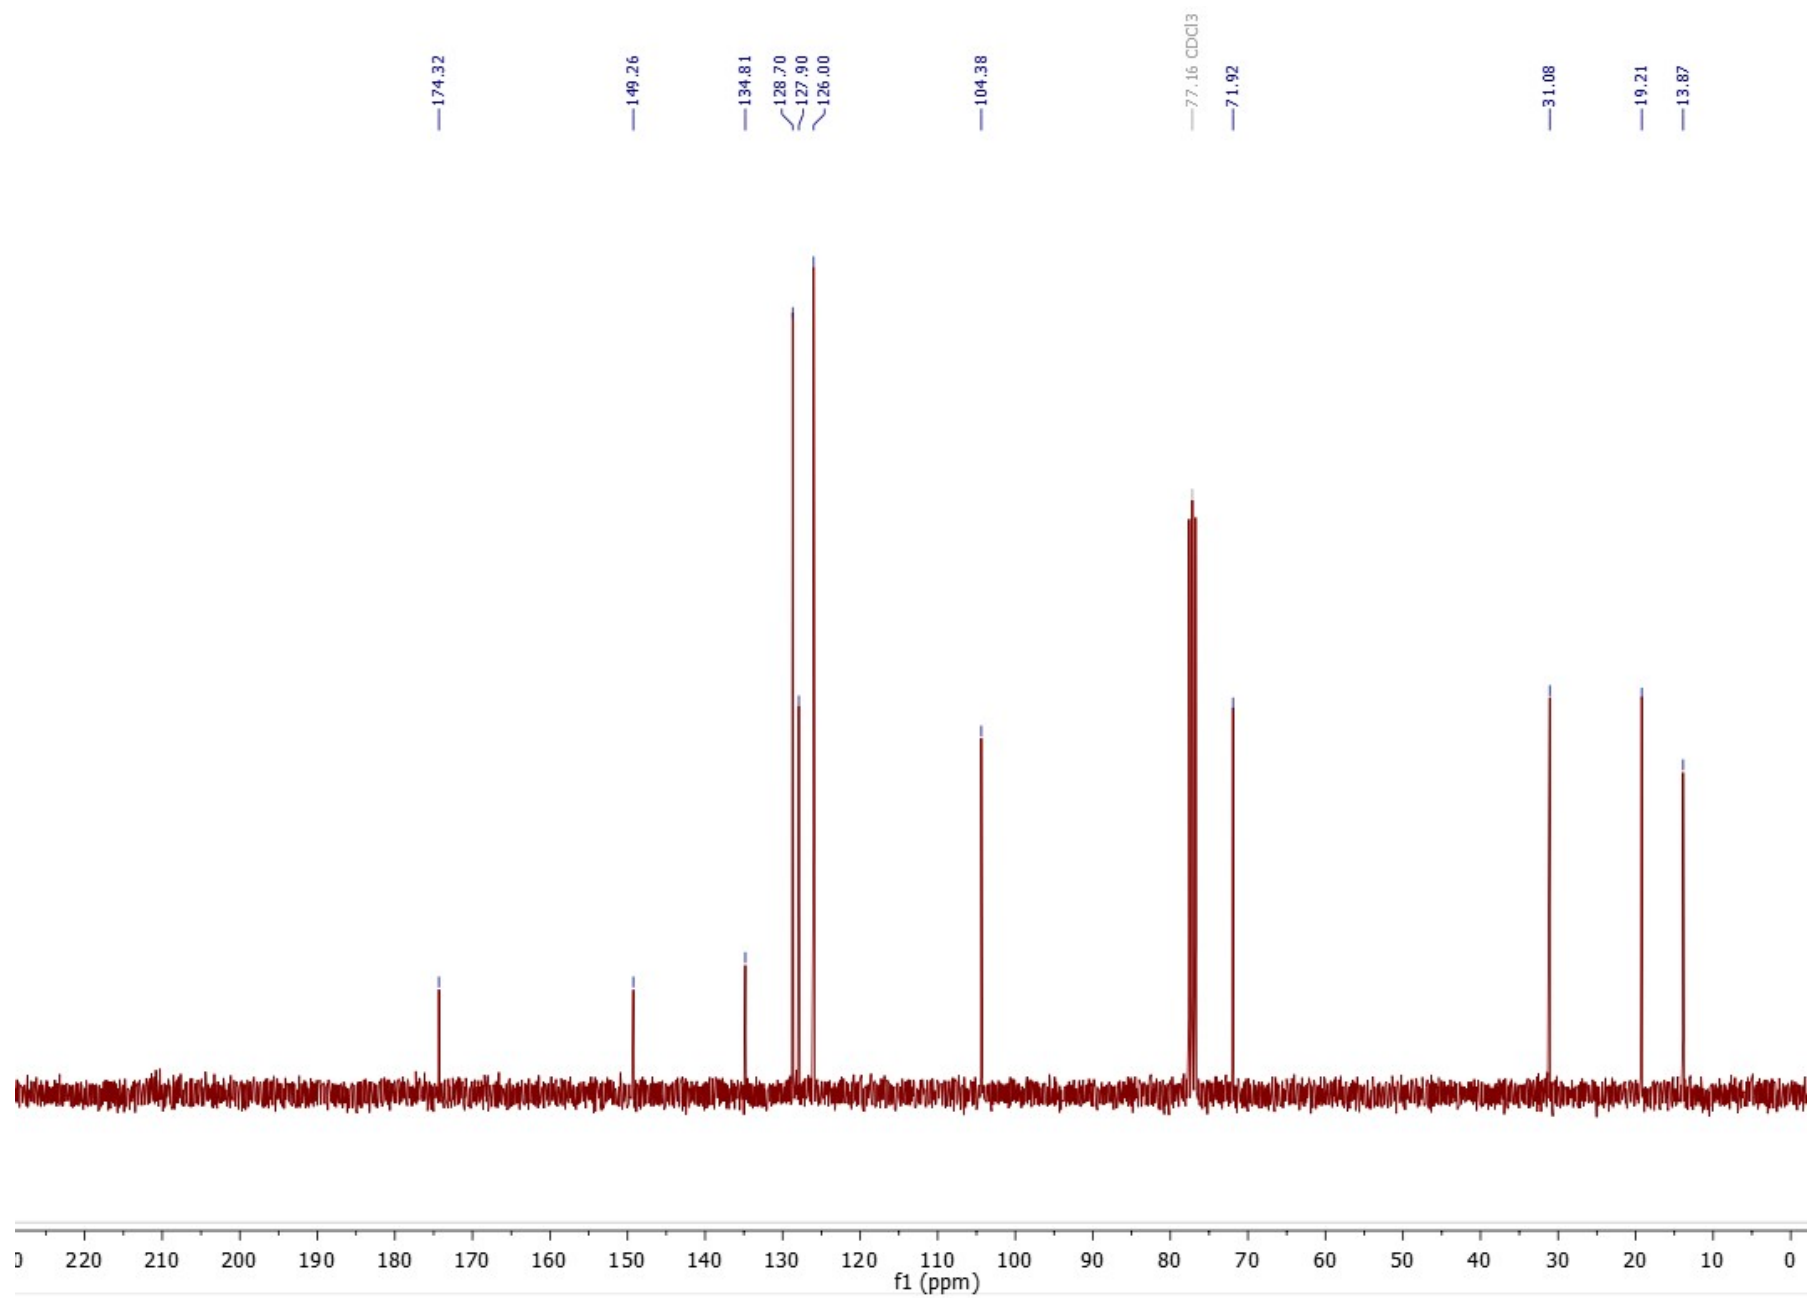

# **2-*iso*-Butoxy-4-phenylthiazole (3ae)**

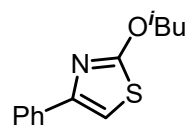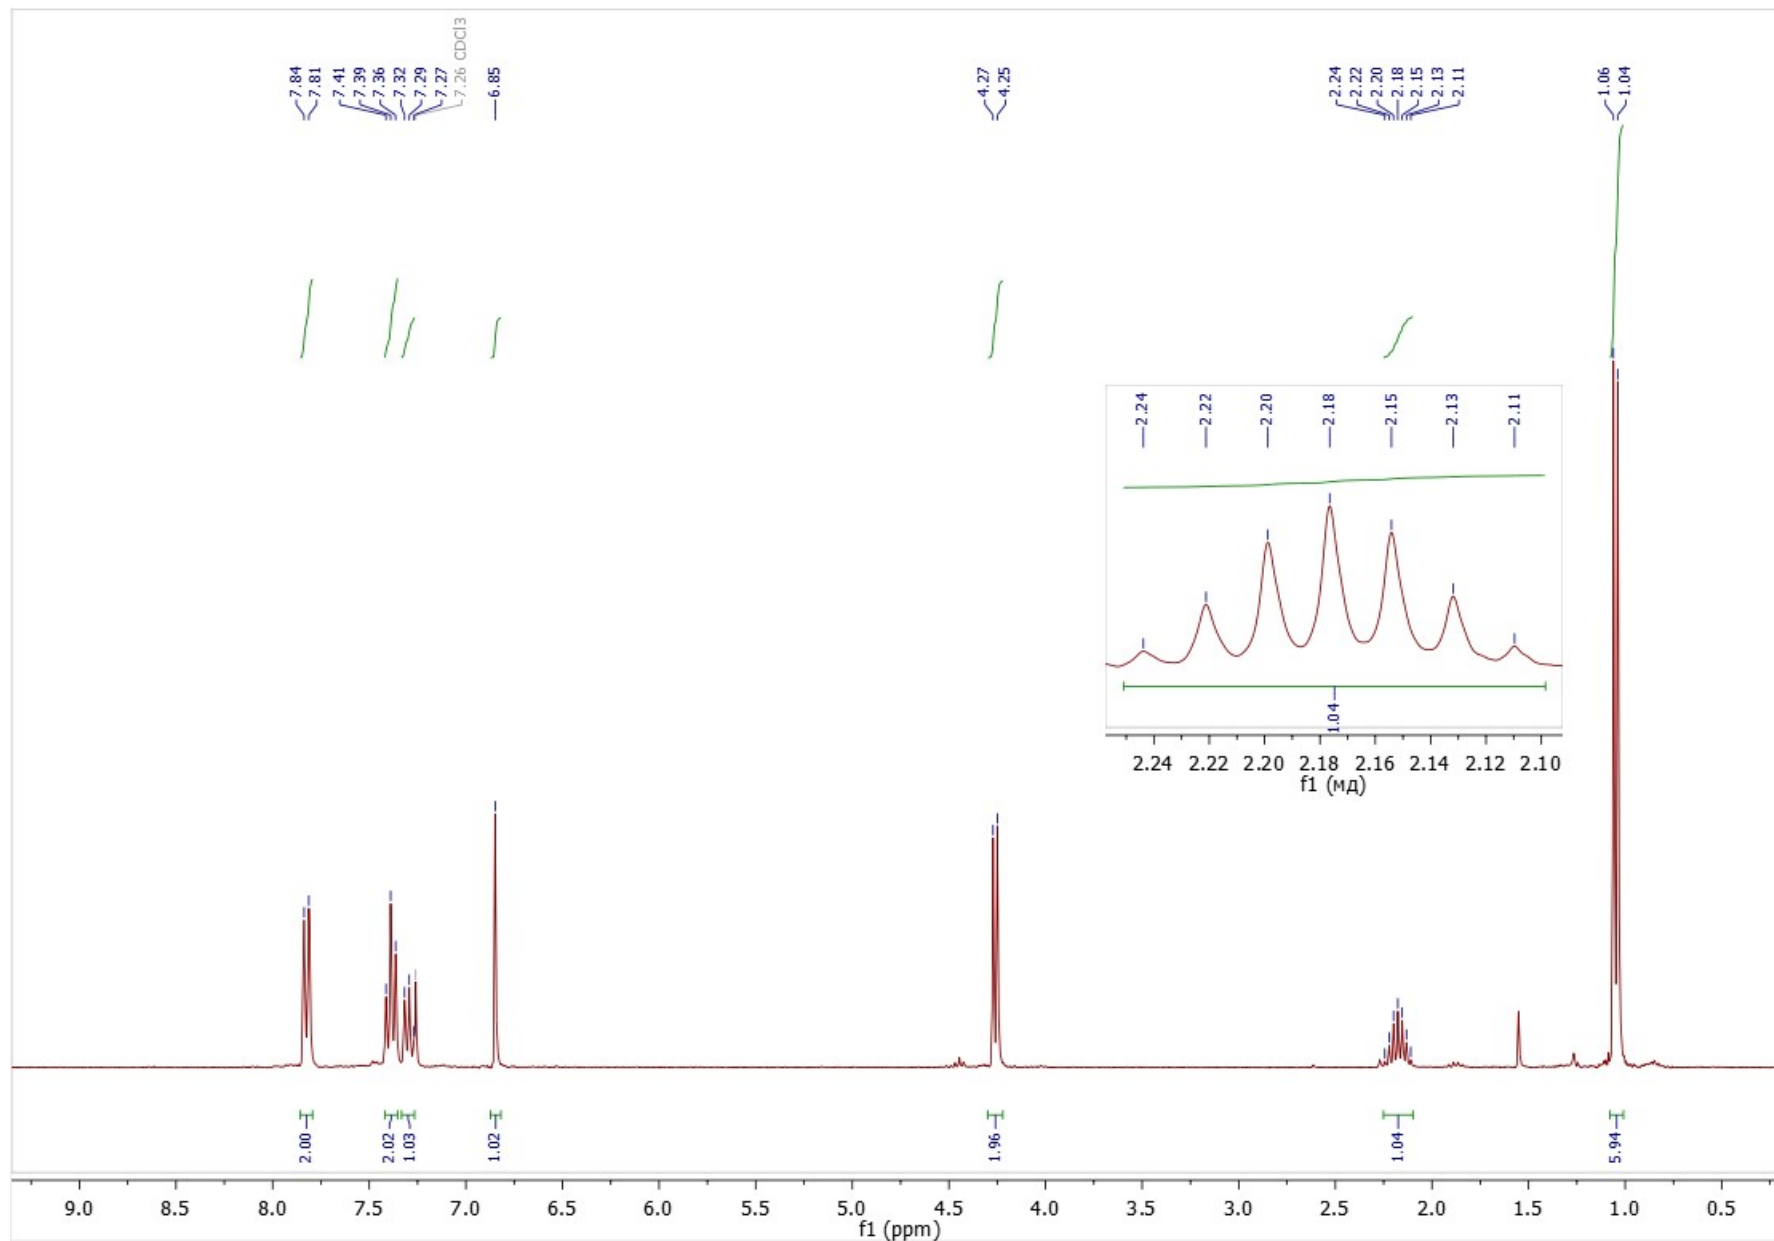

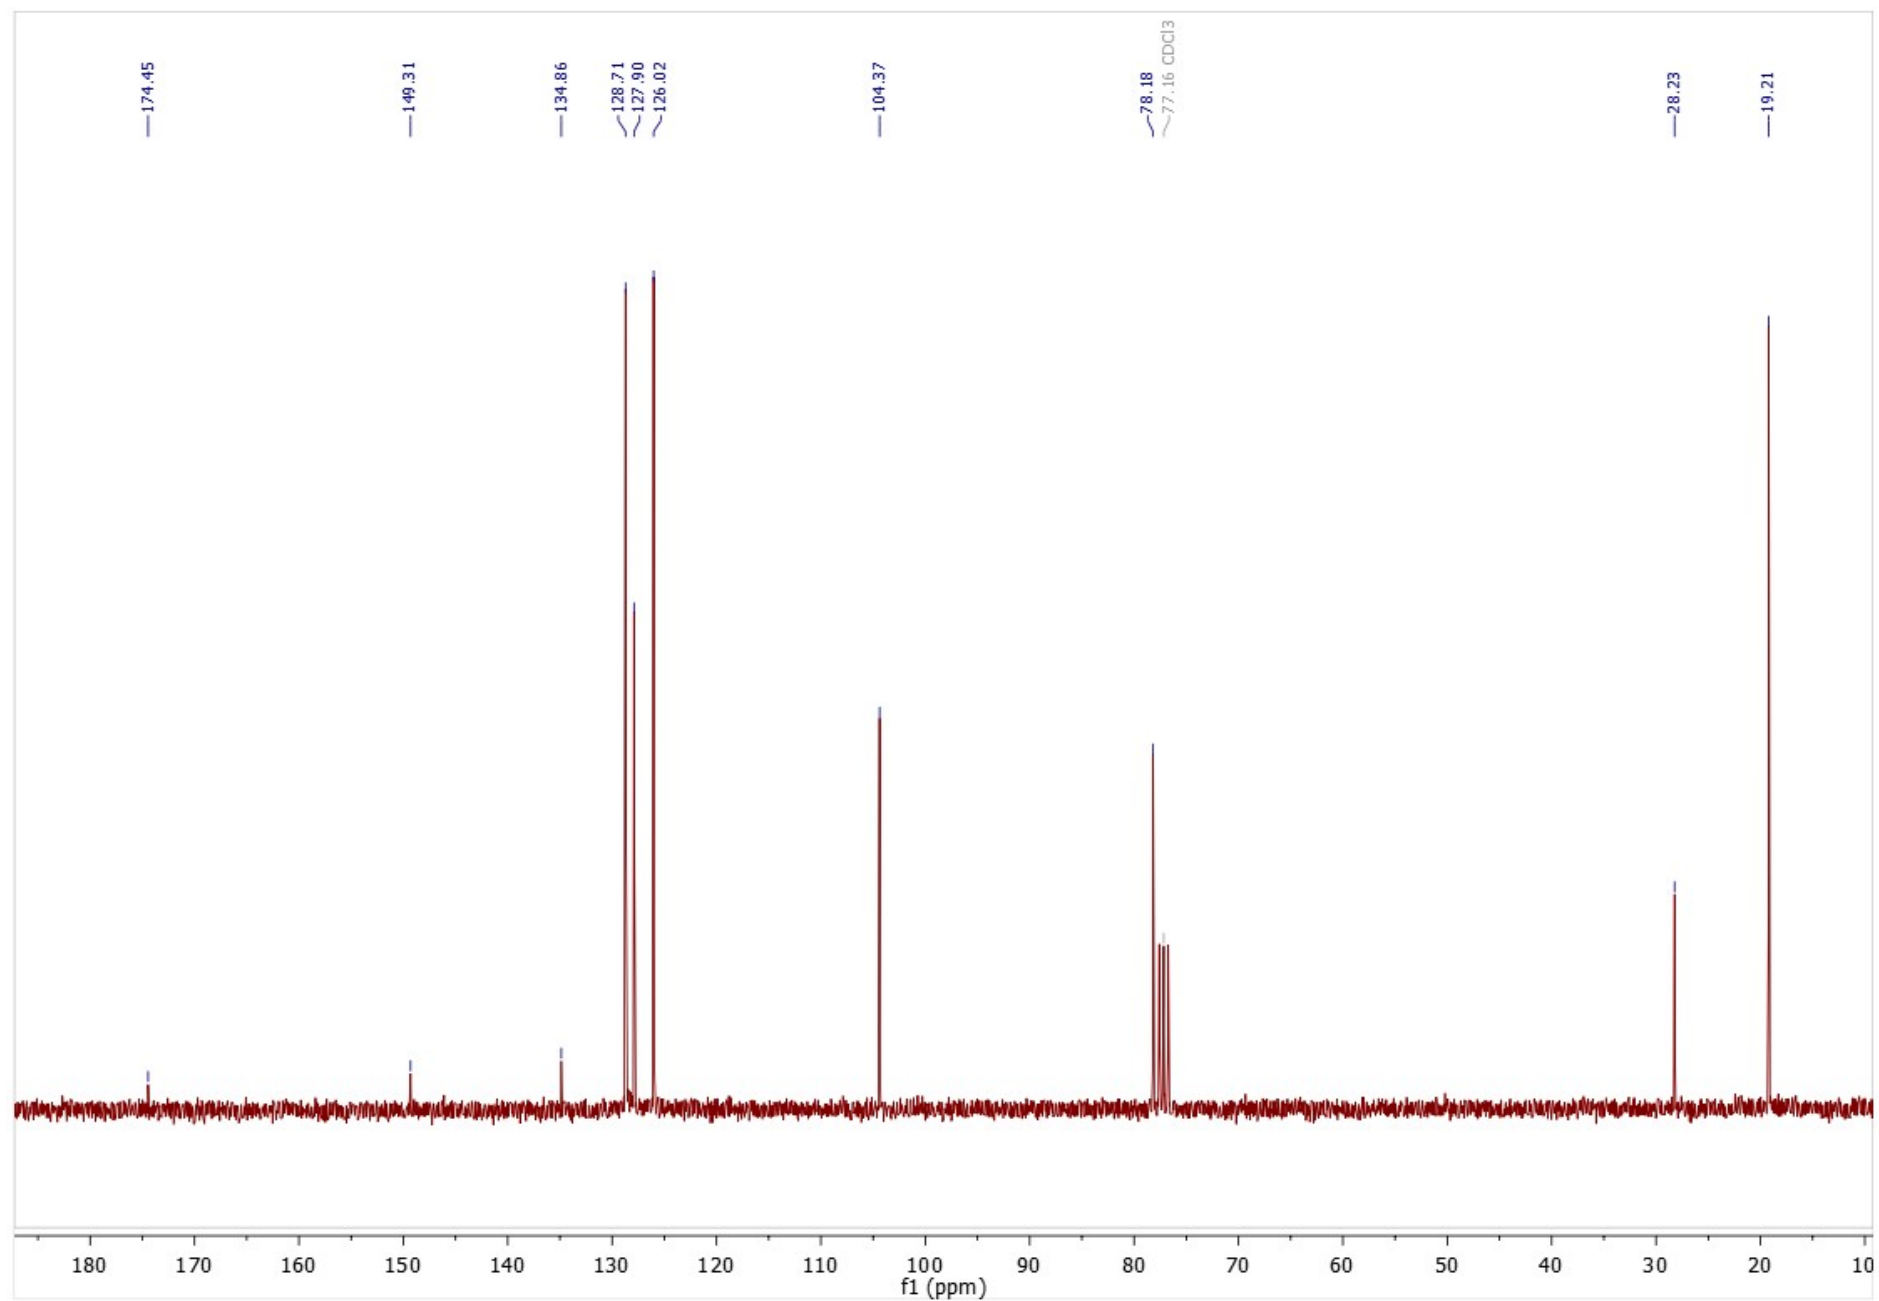

## 2-Nonyloxy-4-phenylthiazole (3af)

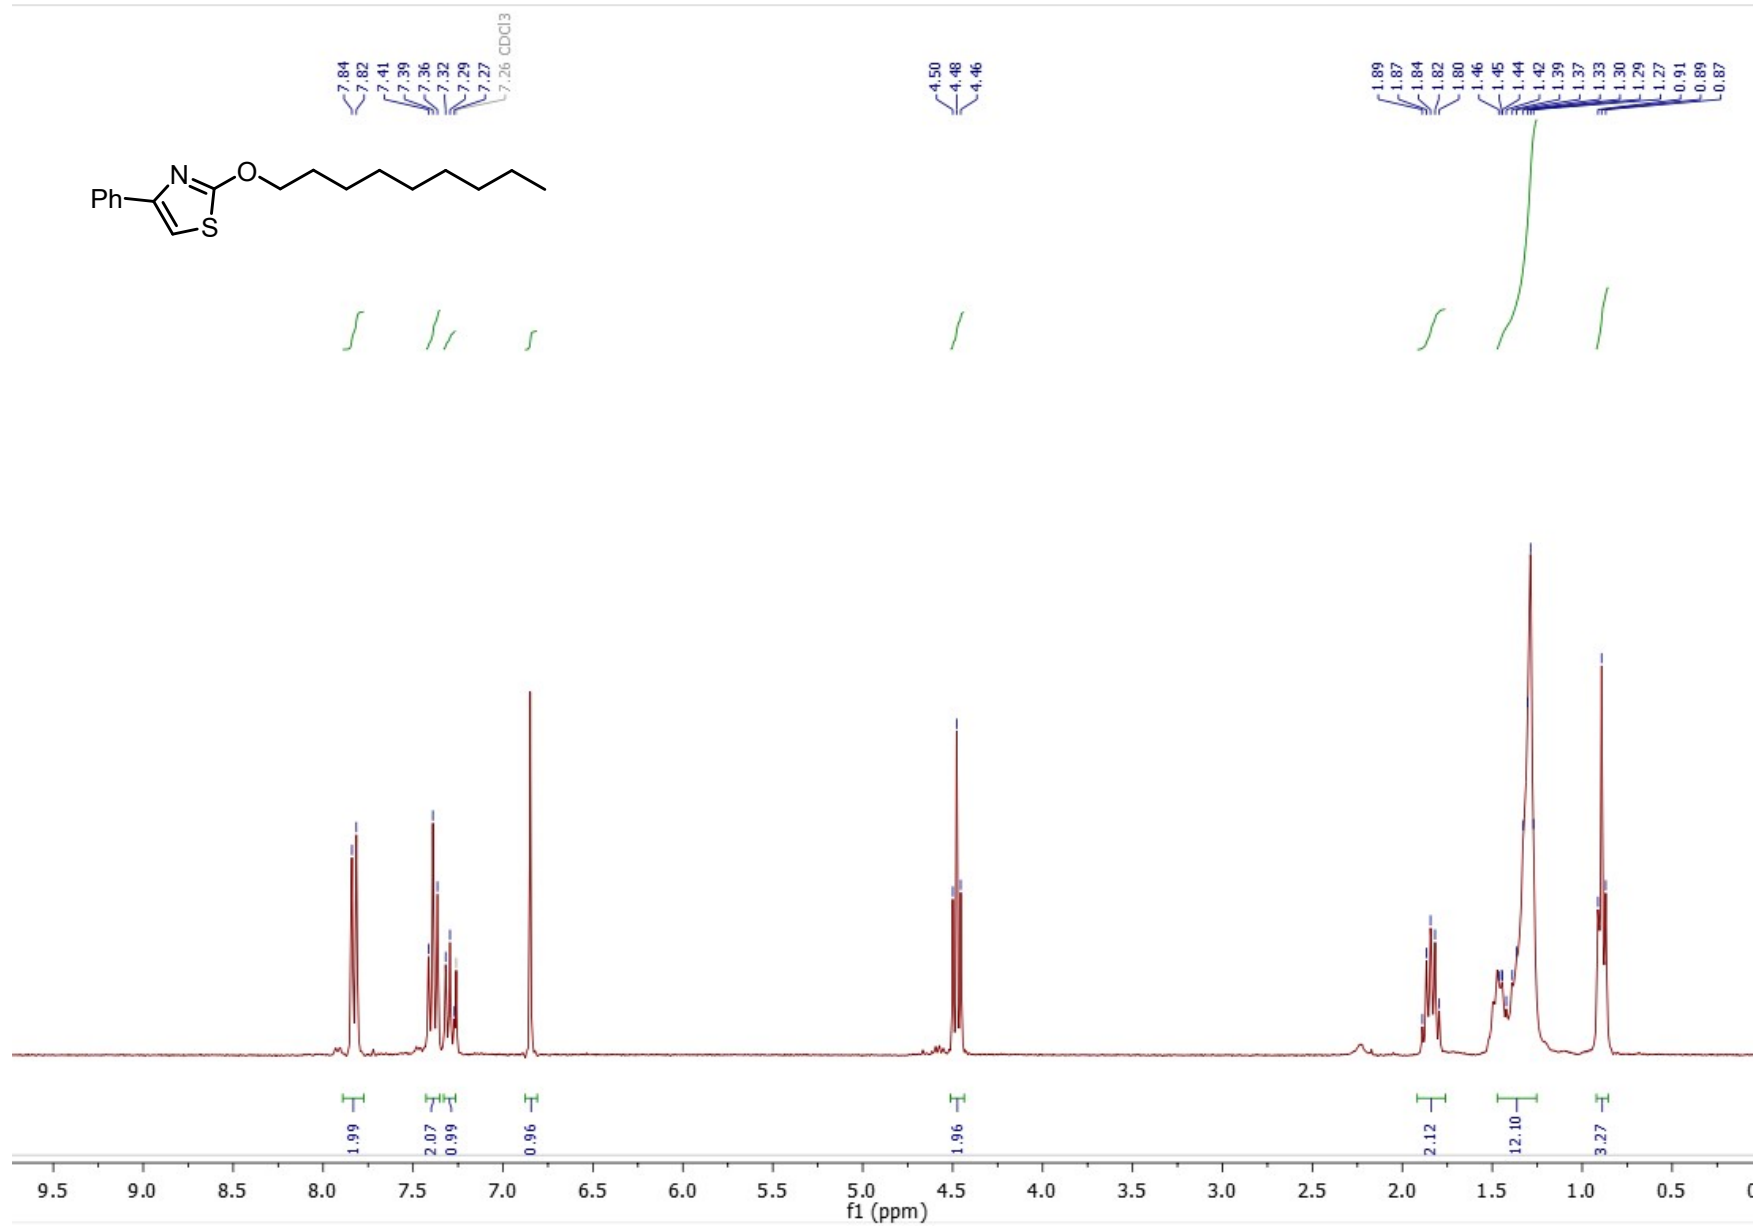

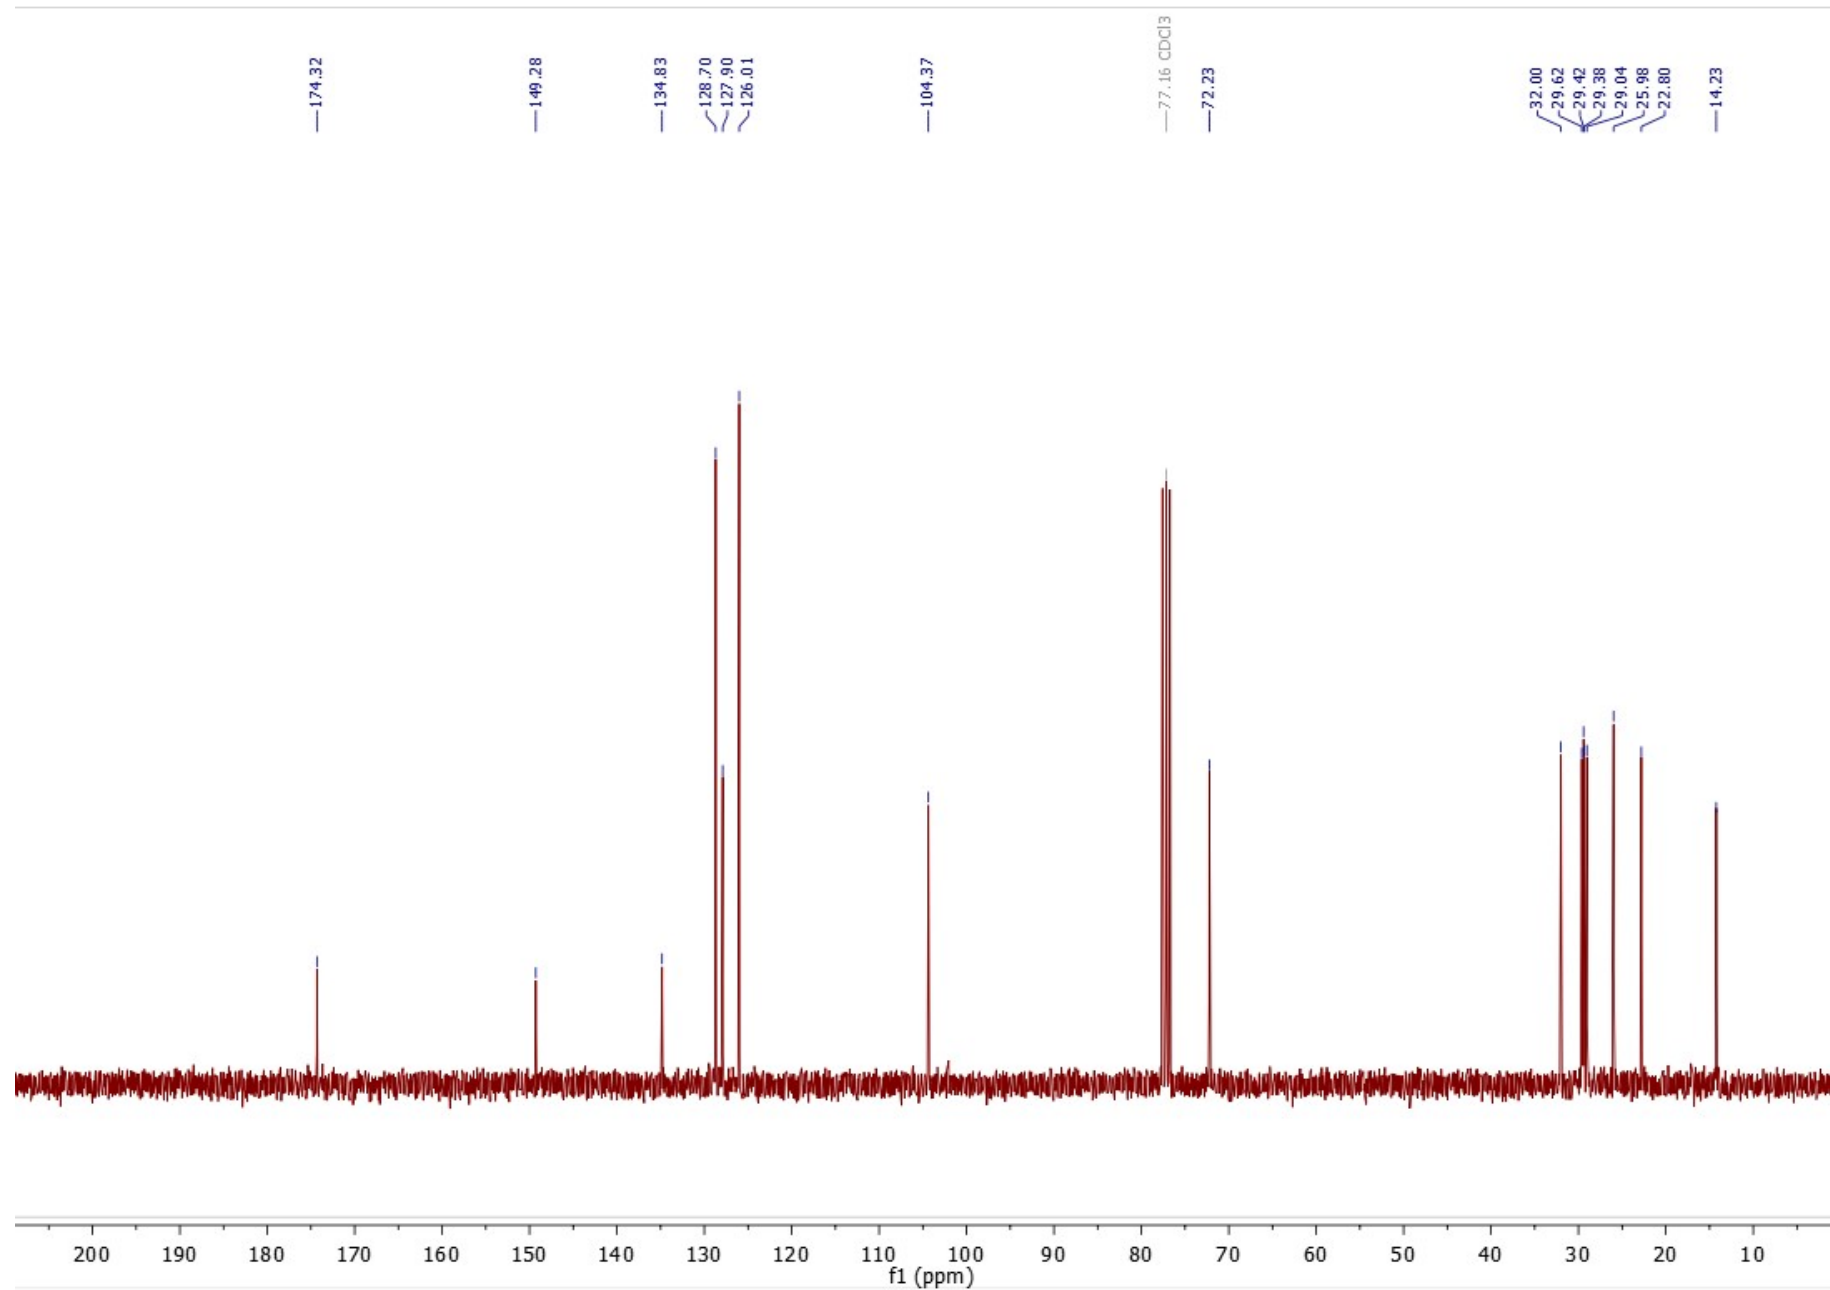

# 2-*tert*-Butoxy-4-phenylthiazole (3ag)

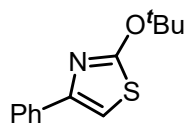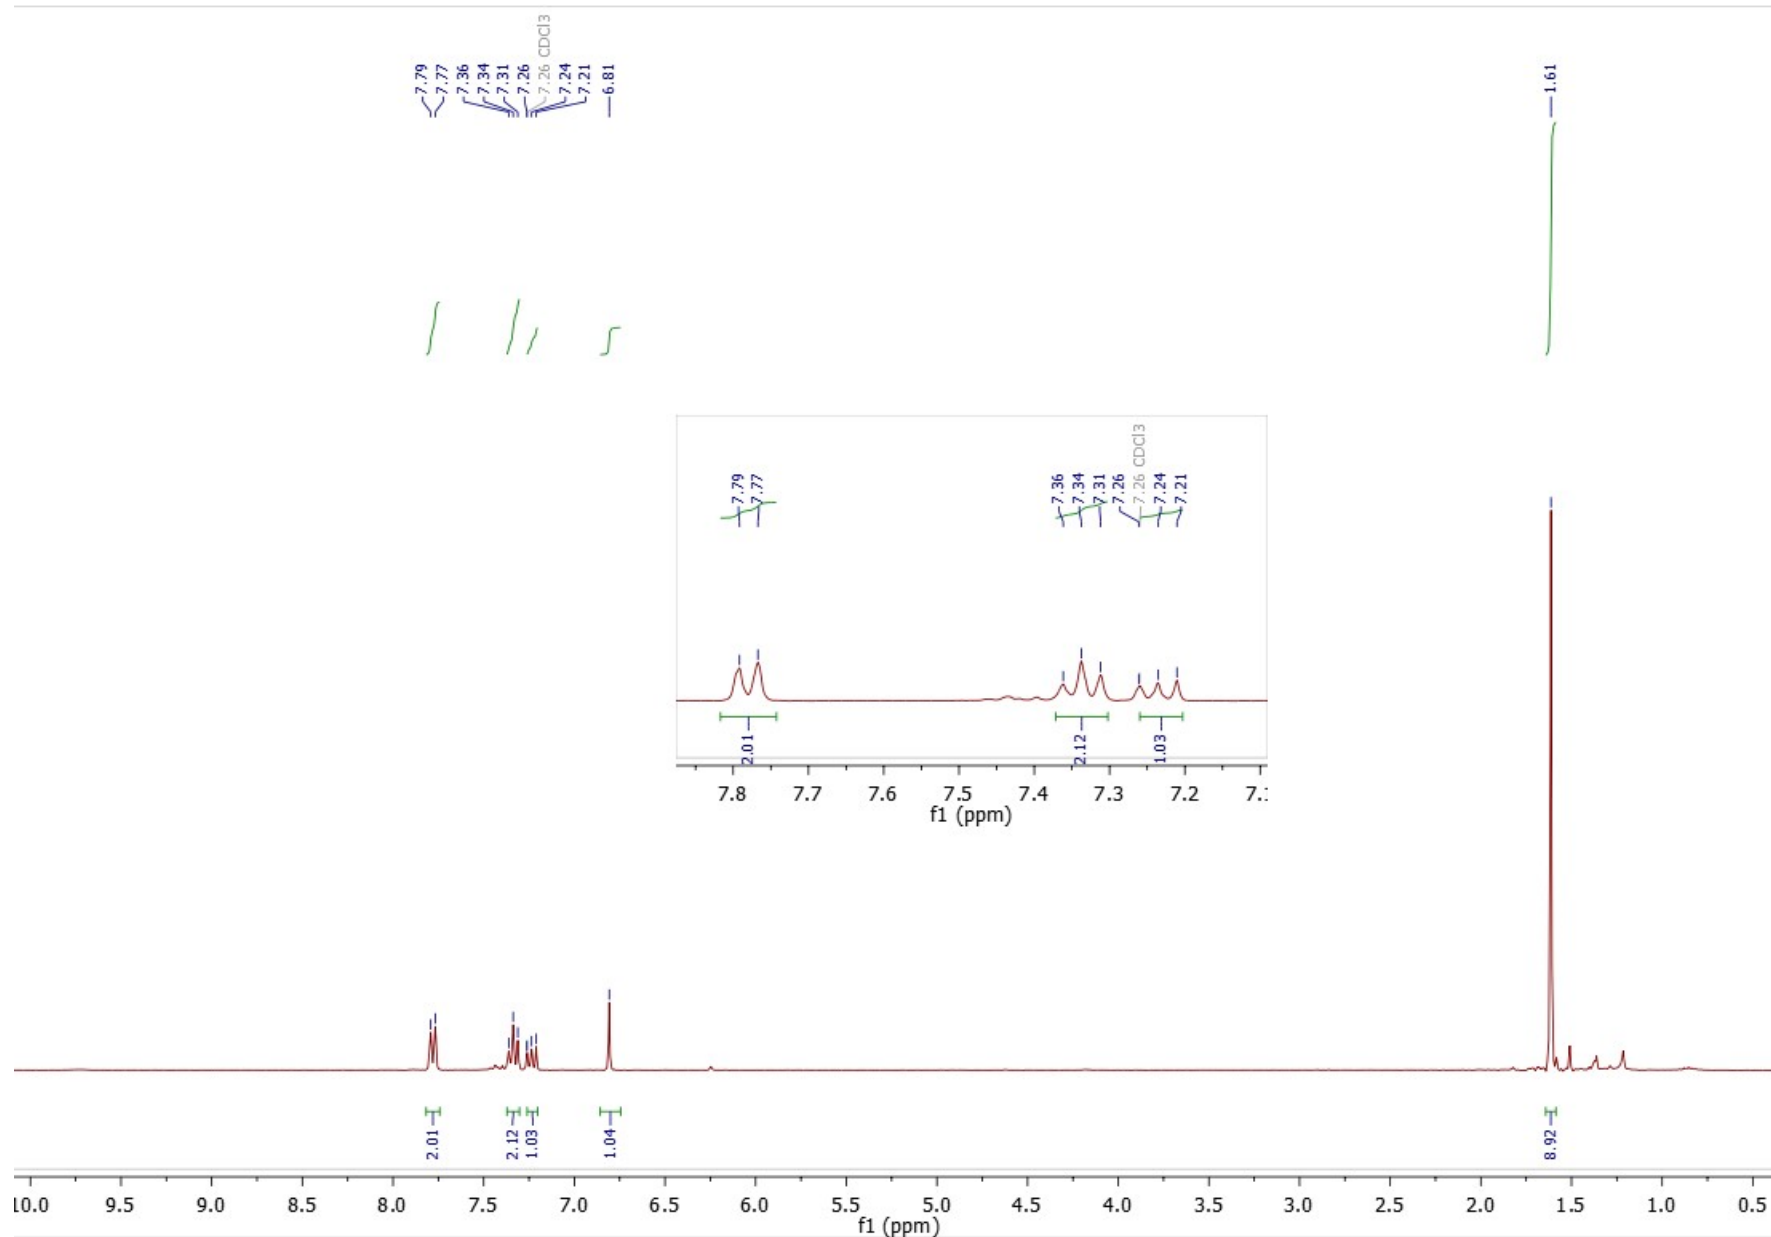

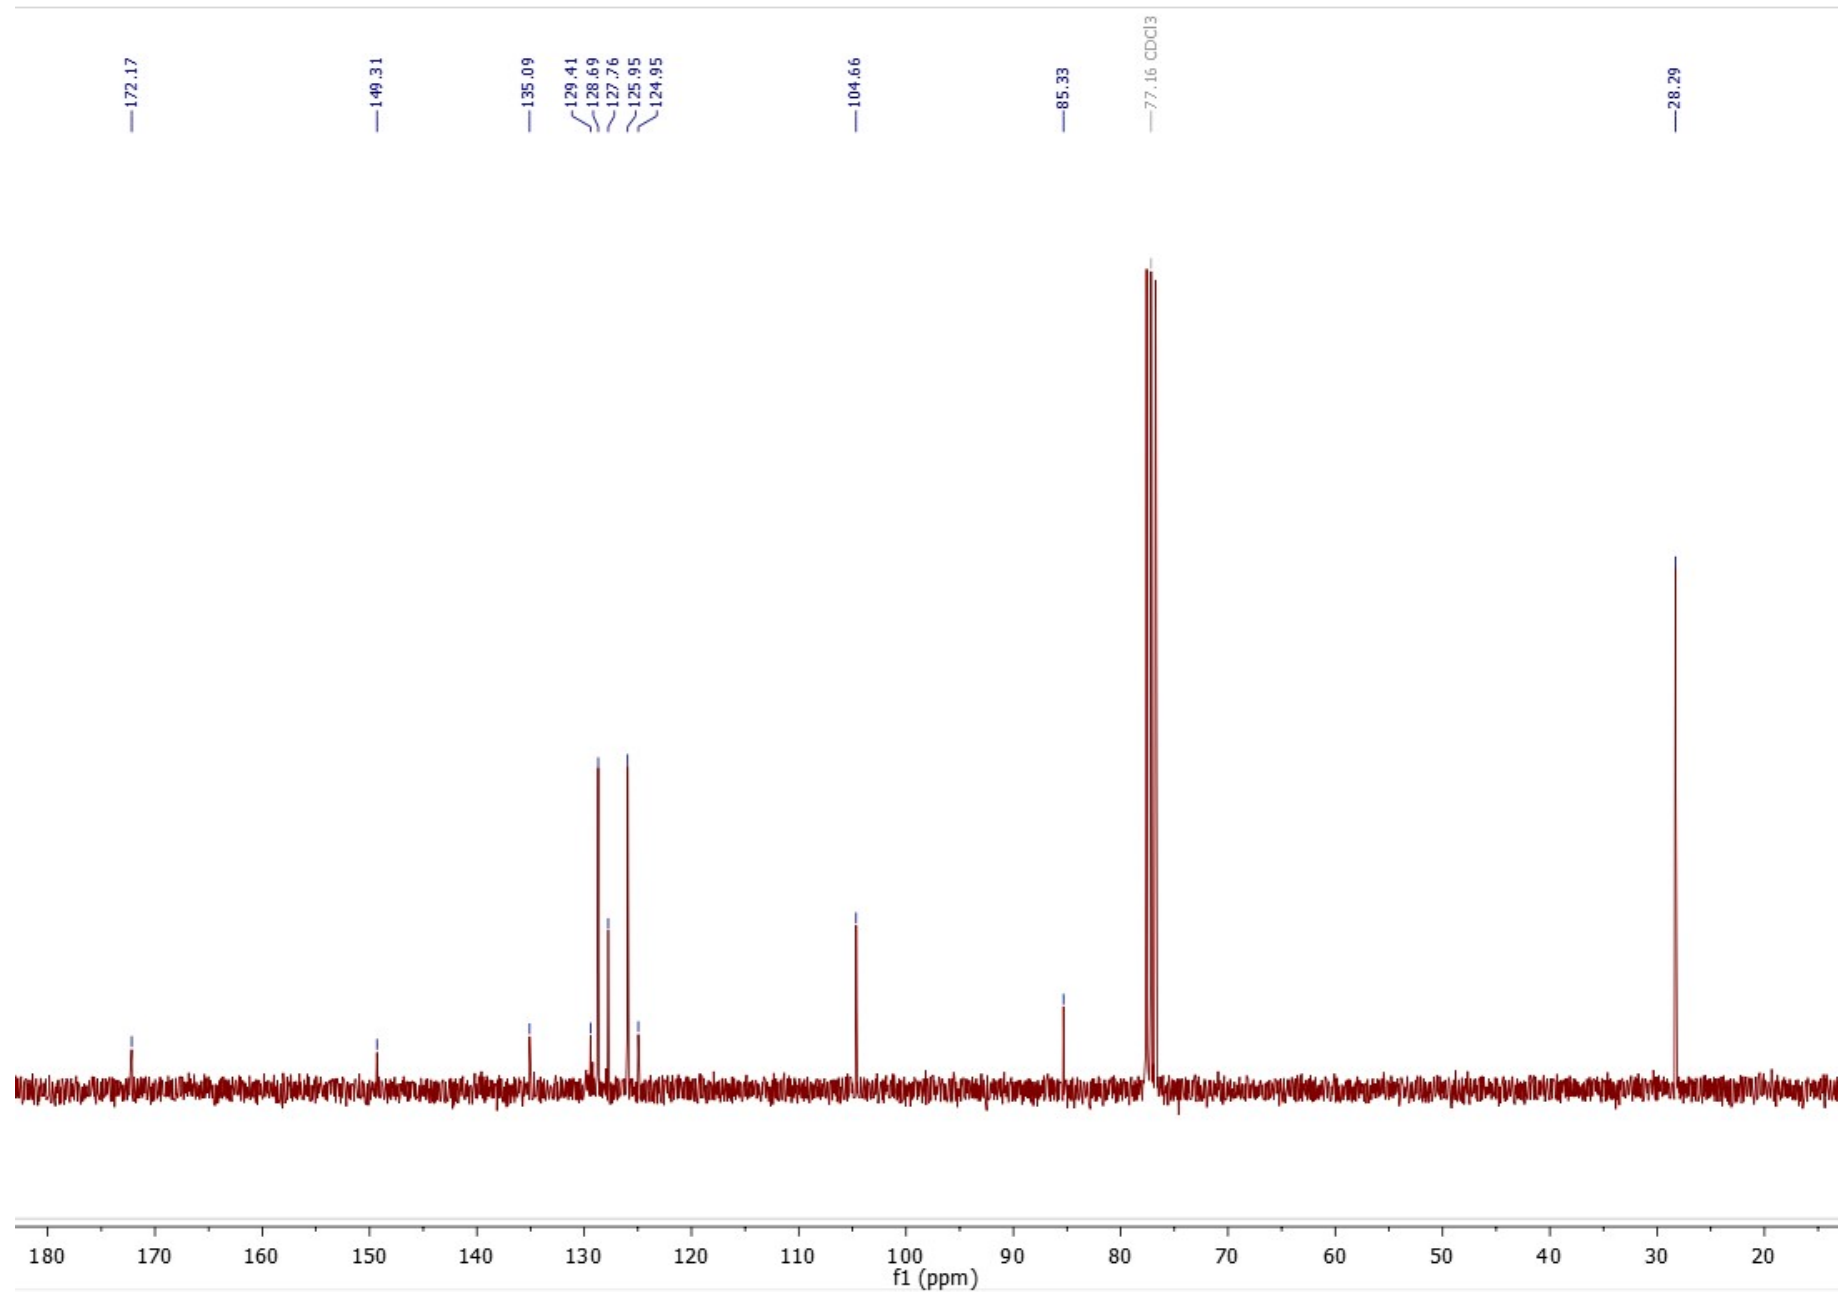

# 2-Benzyloxy-4-phenylthiazole (3ah)

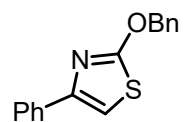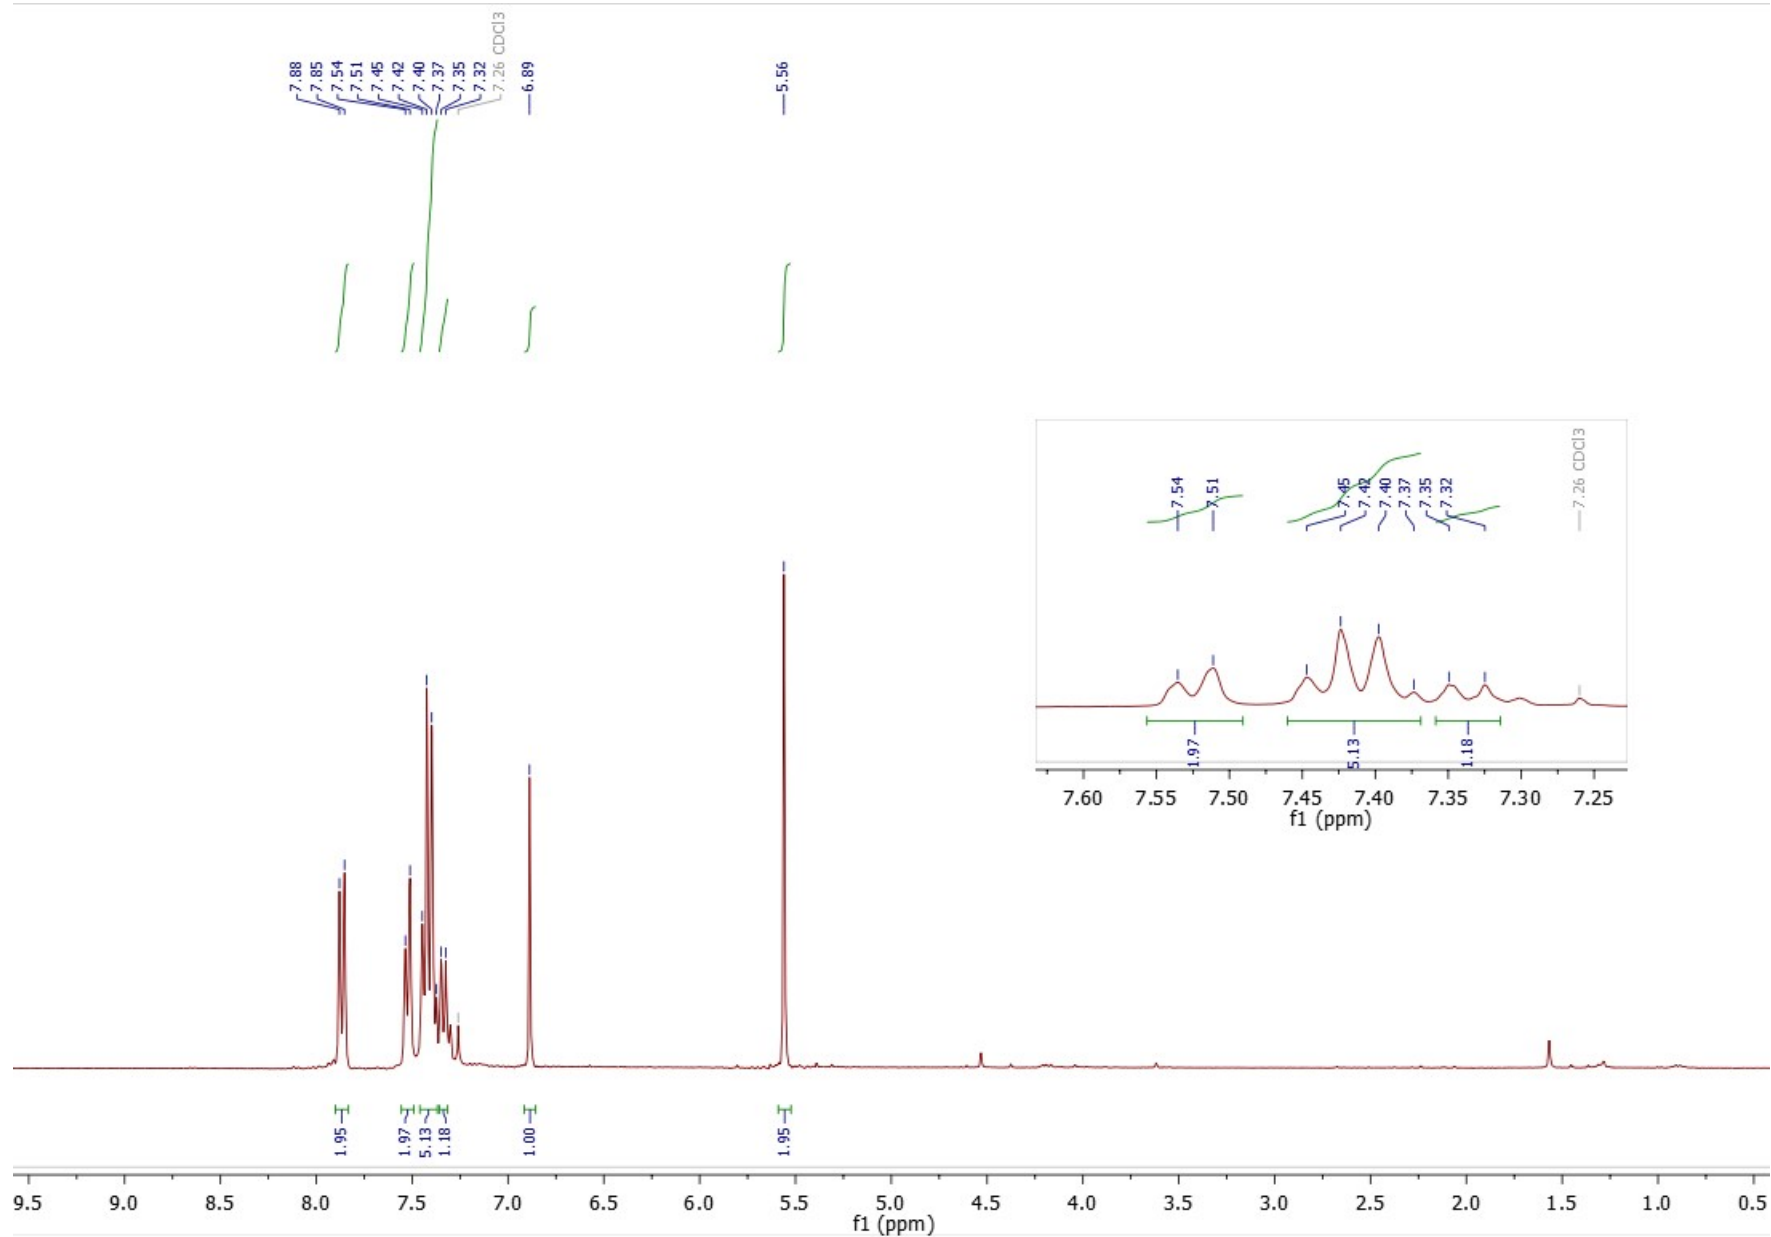

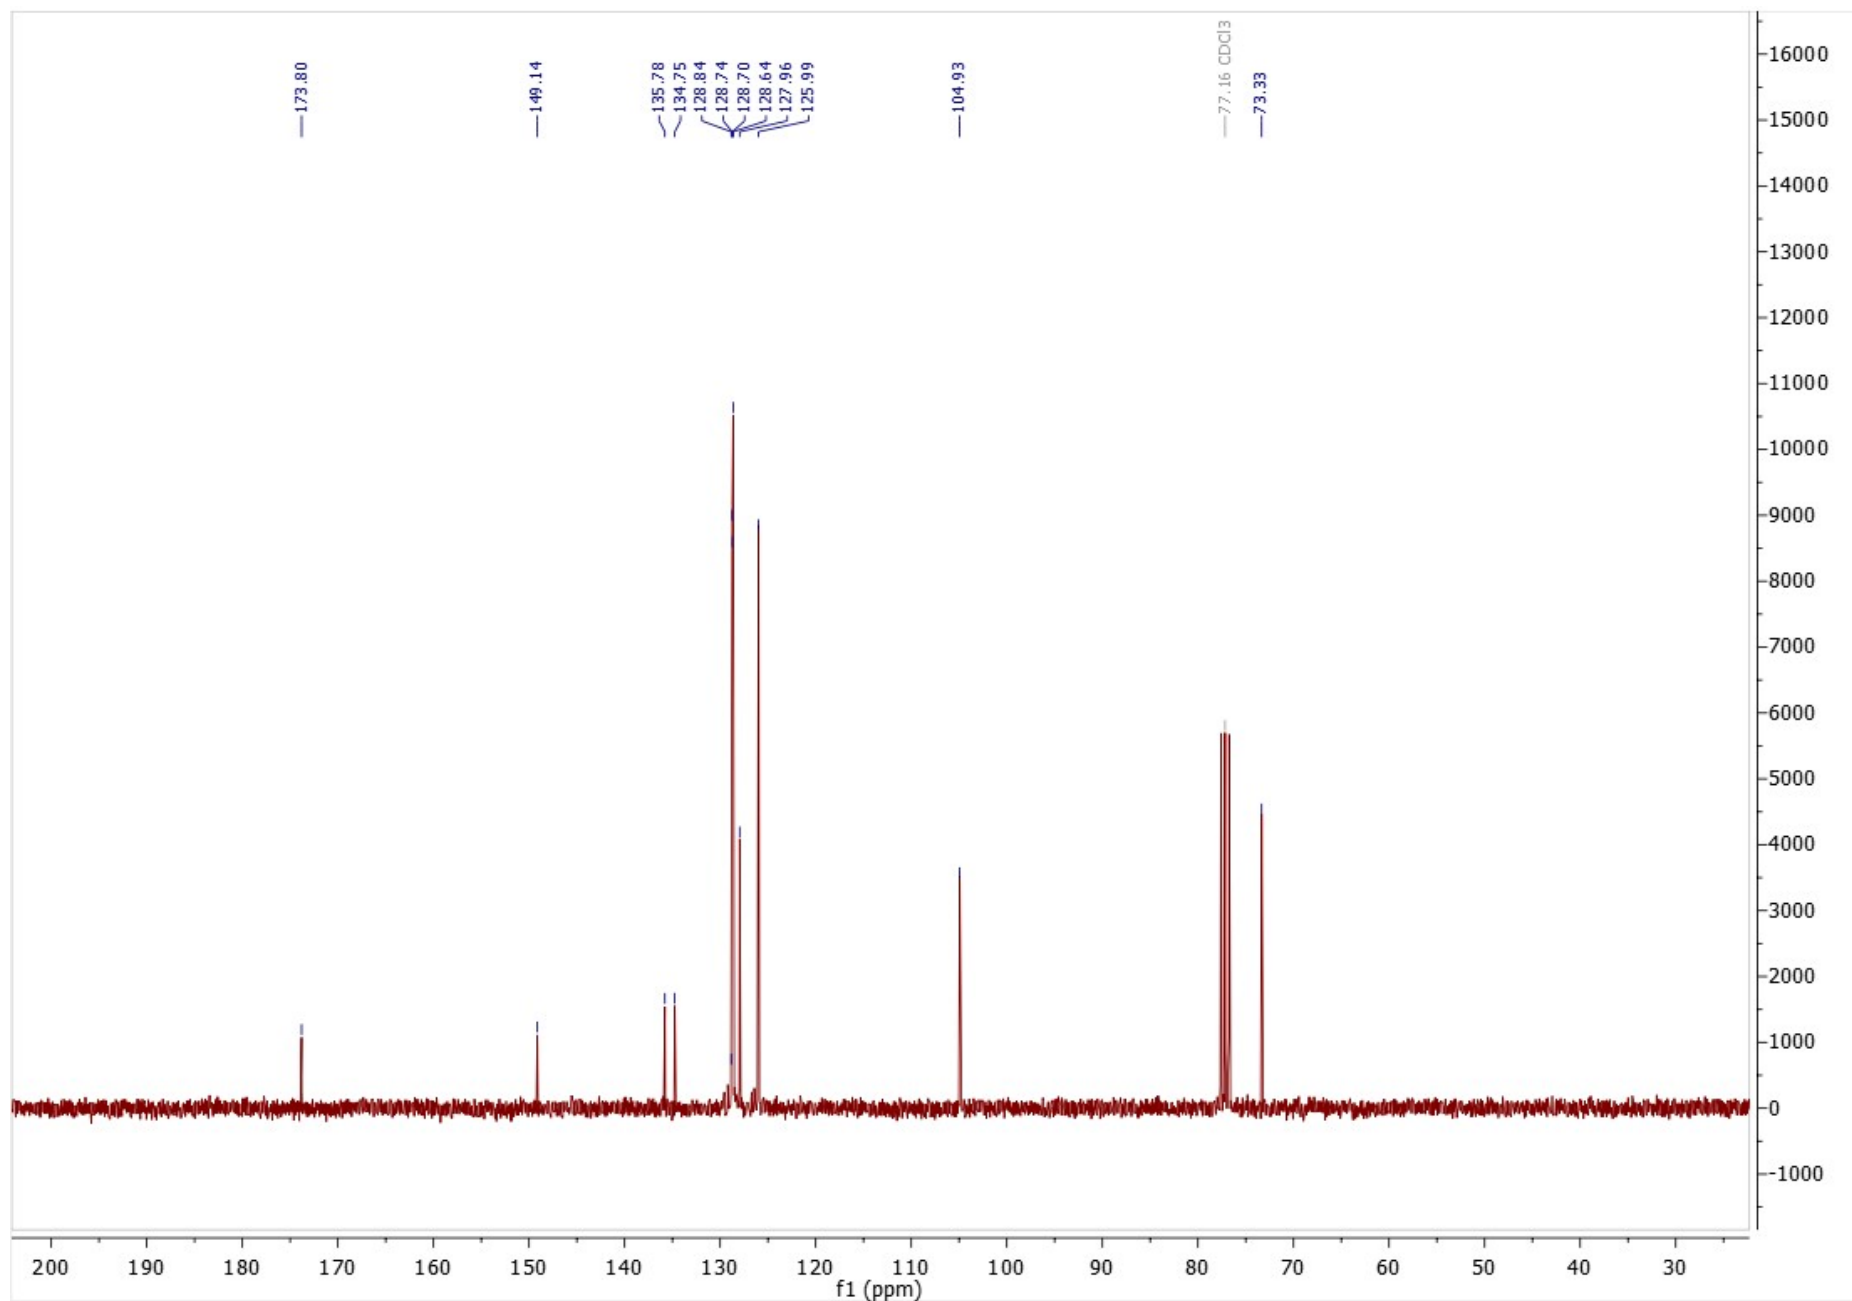

# 2-(Allyloxy)-4-phenylthiazole (3ai)

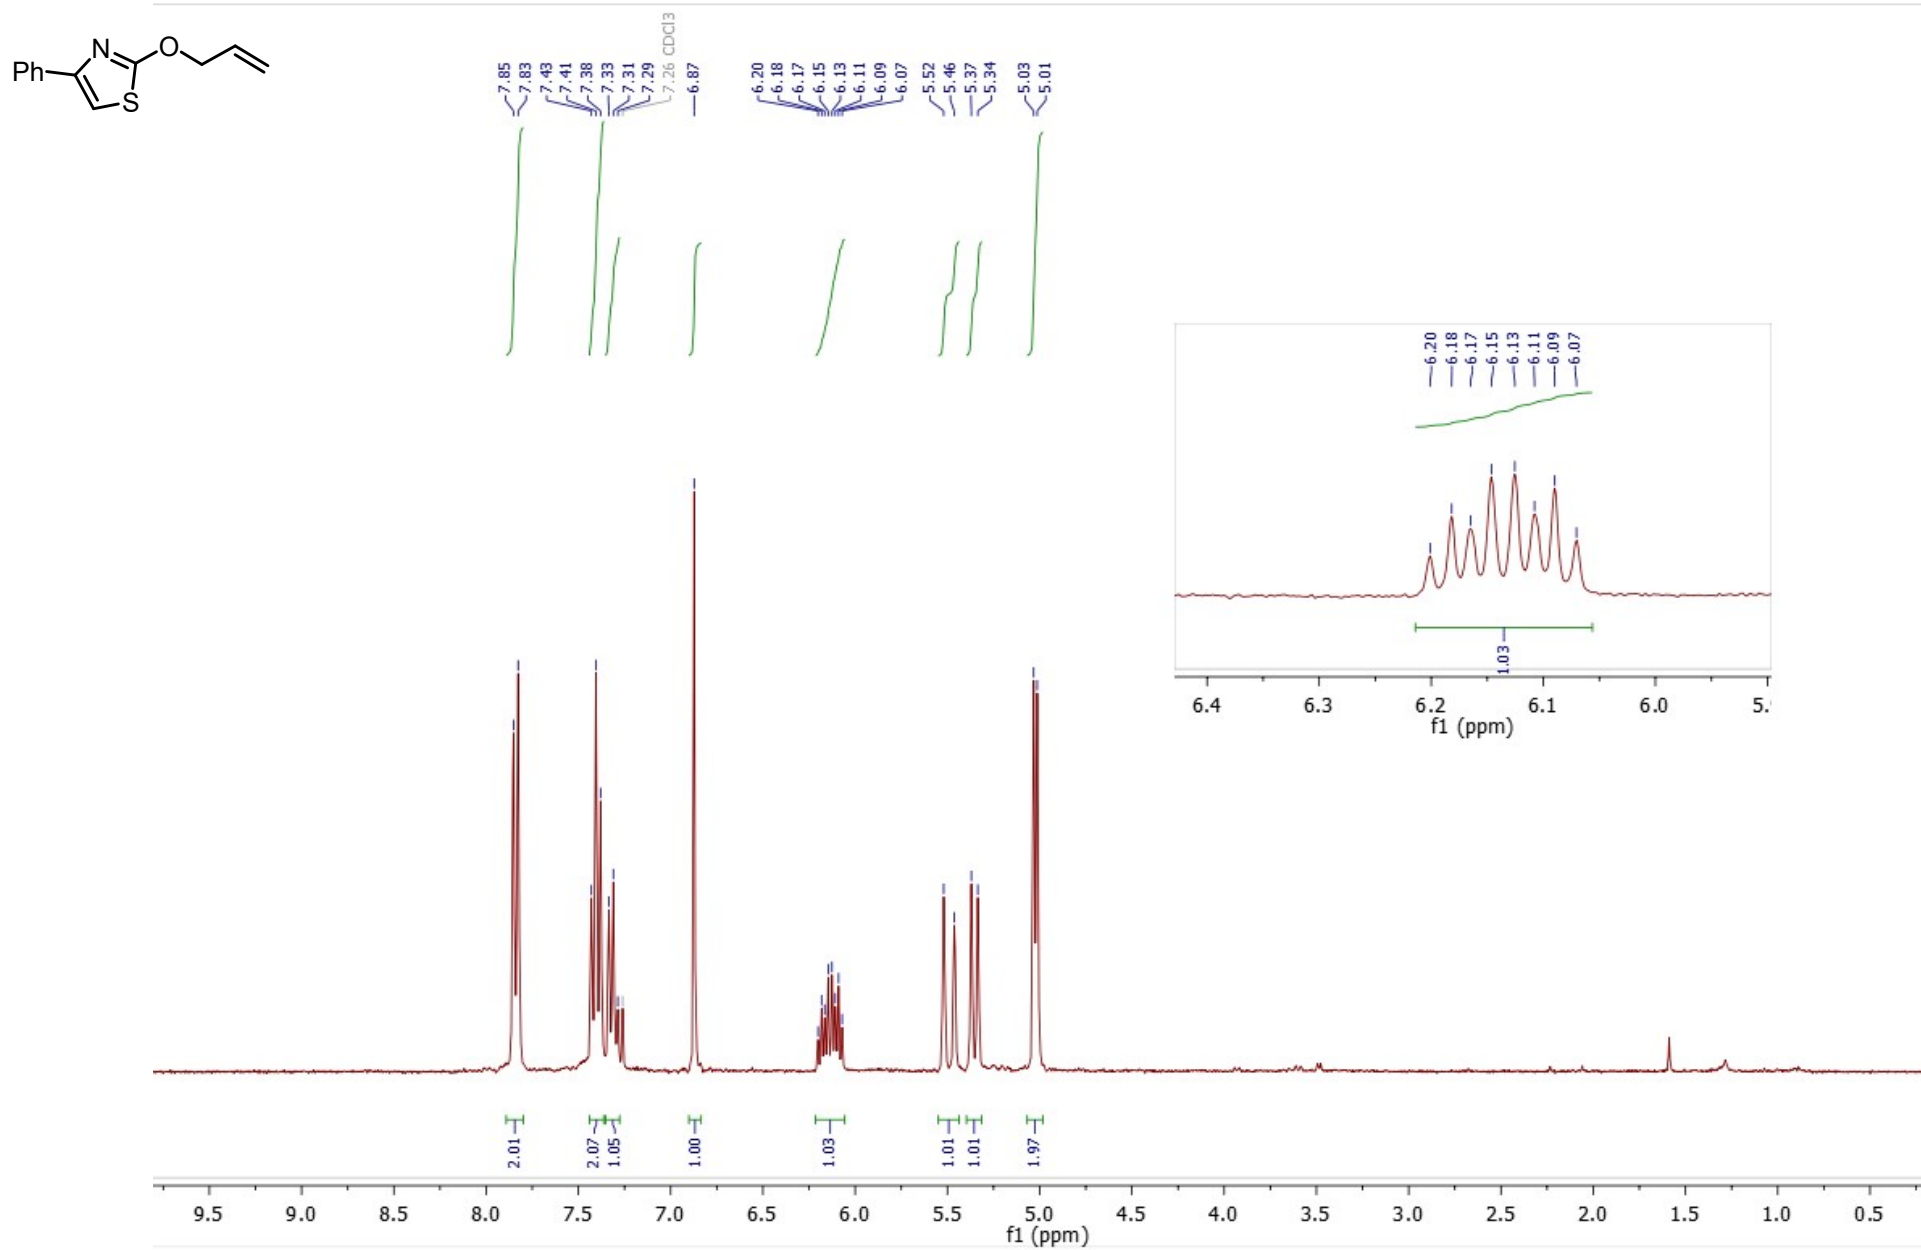

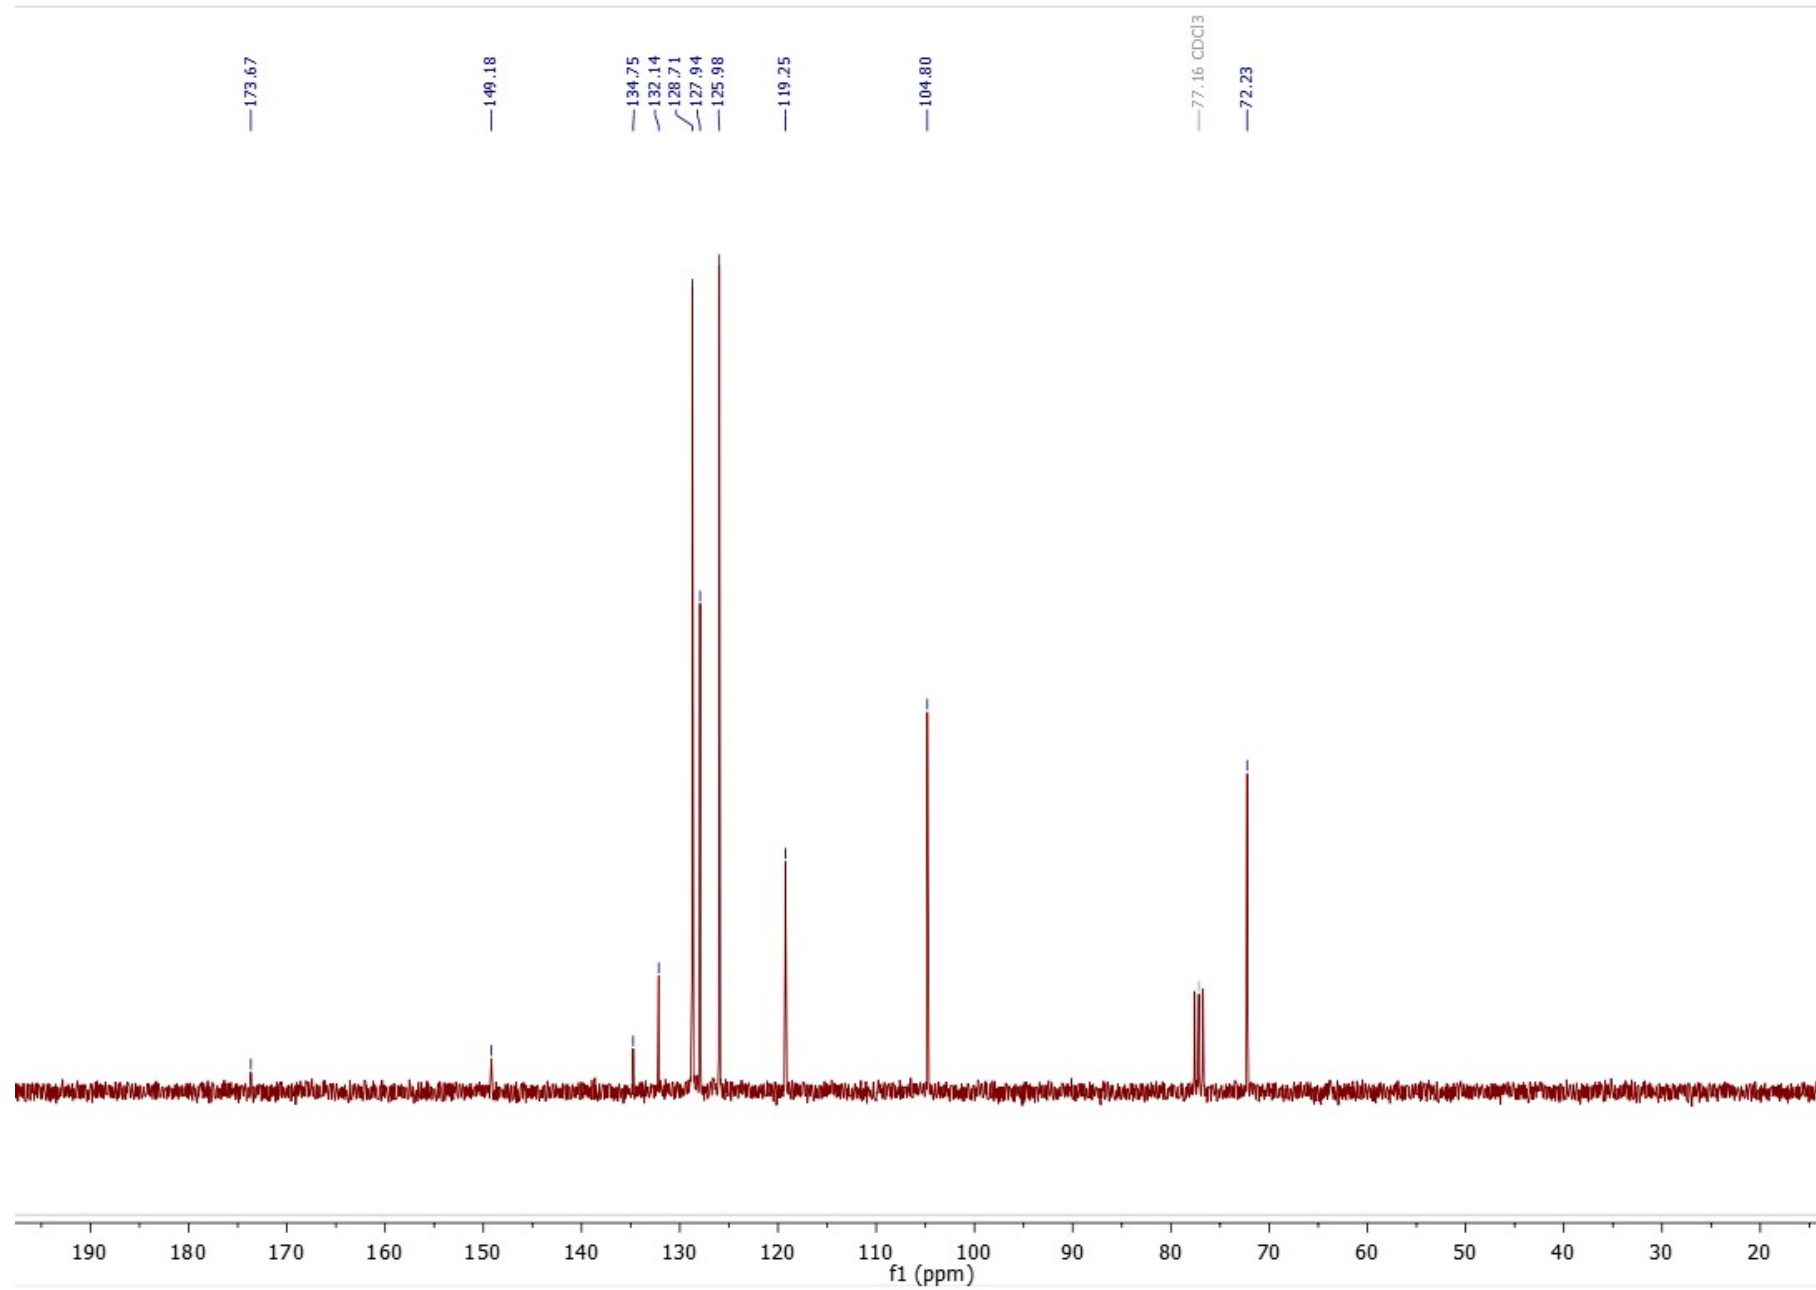

(Z)-2-(Hex-3-en-1-yloxy)-4-phenylthiazole (3aj)

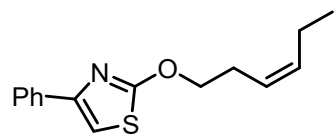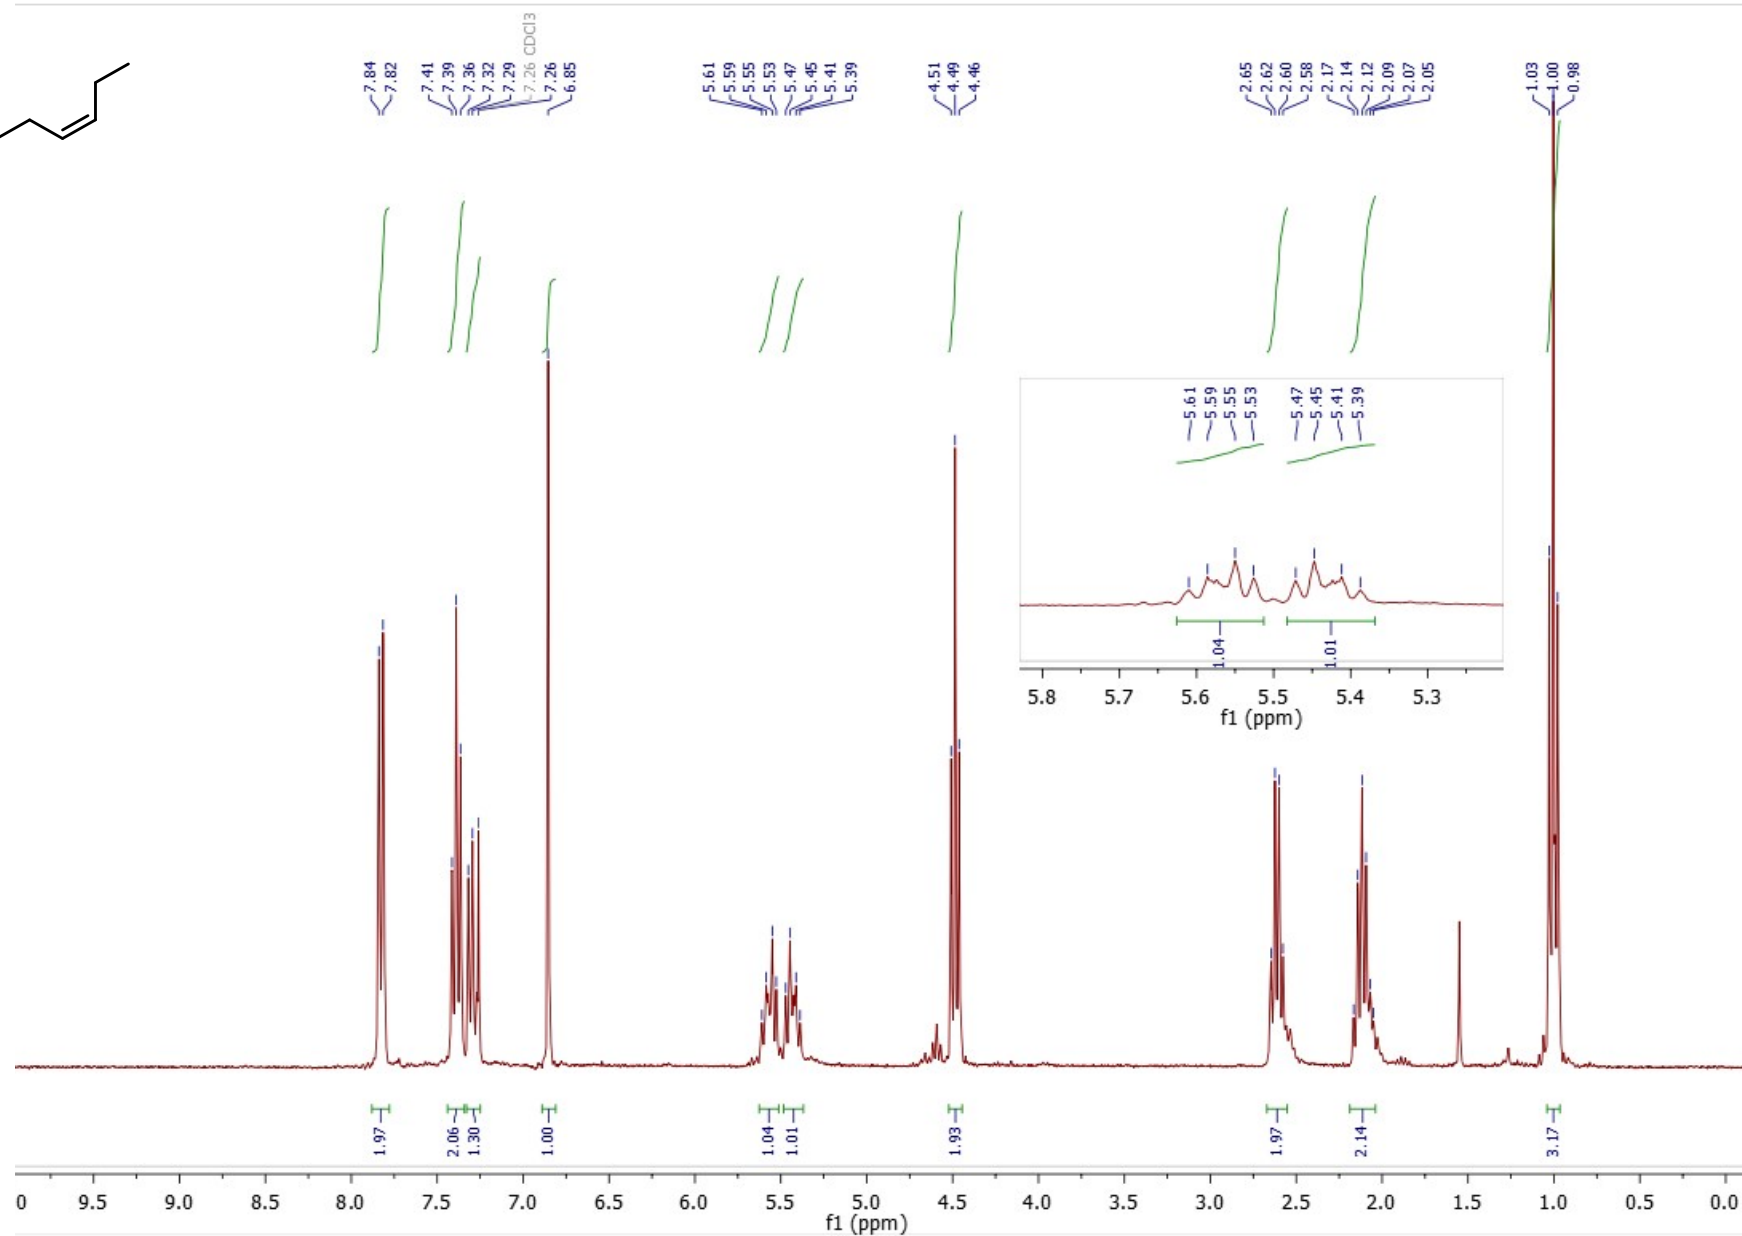

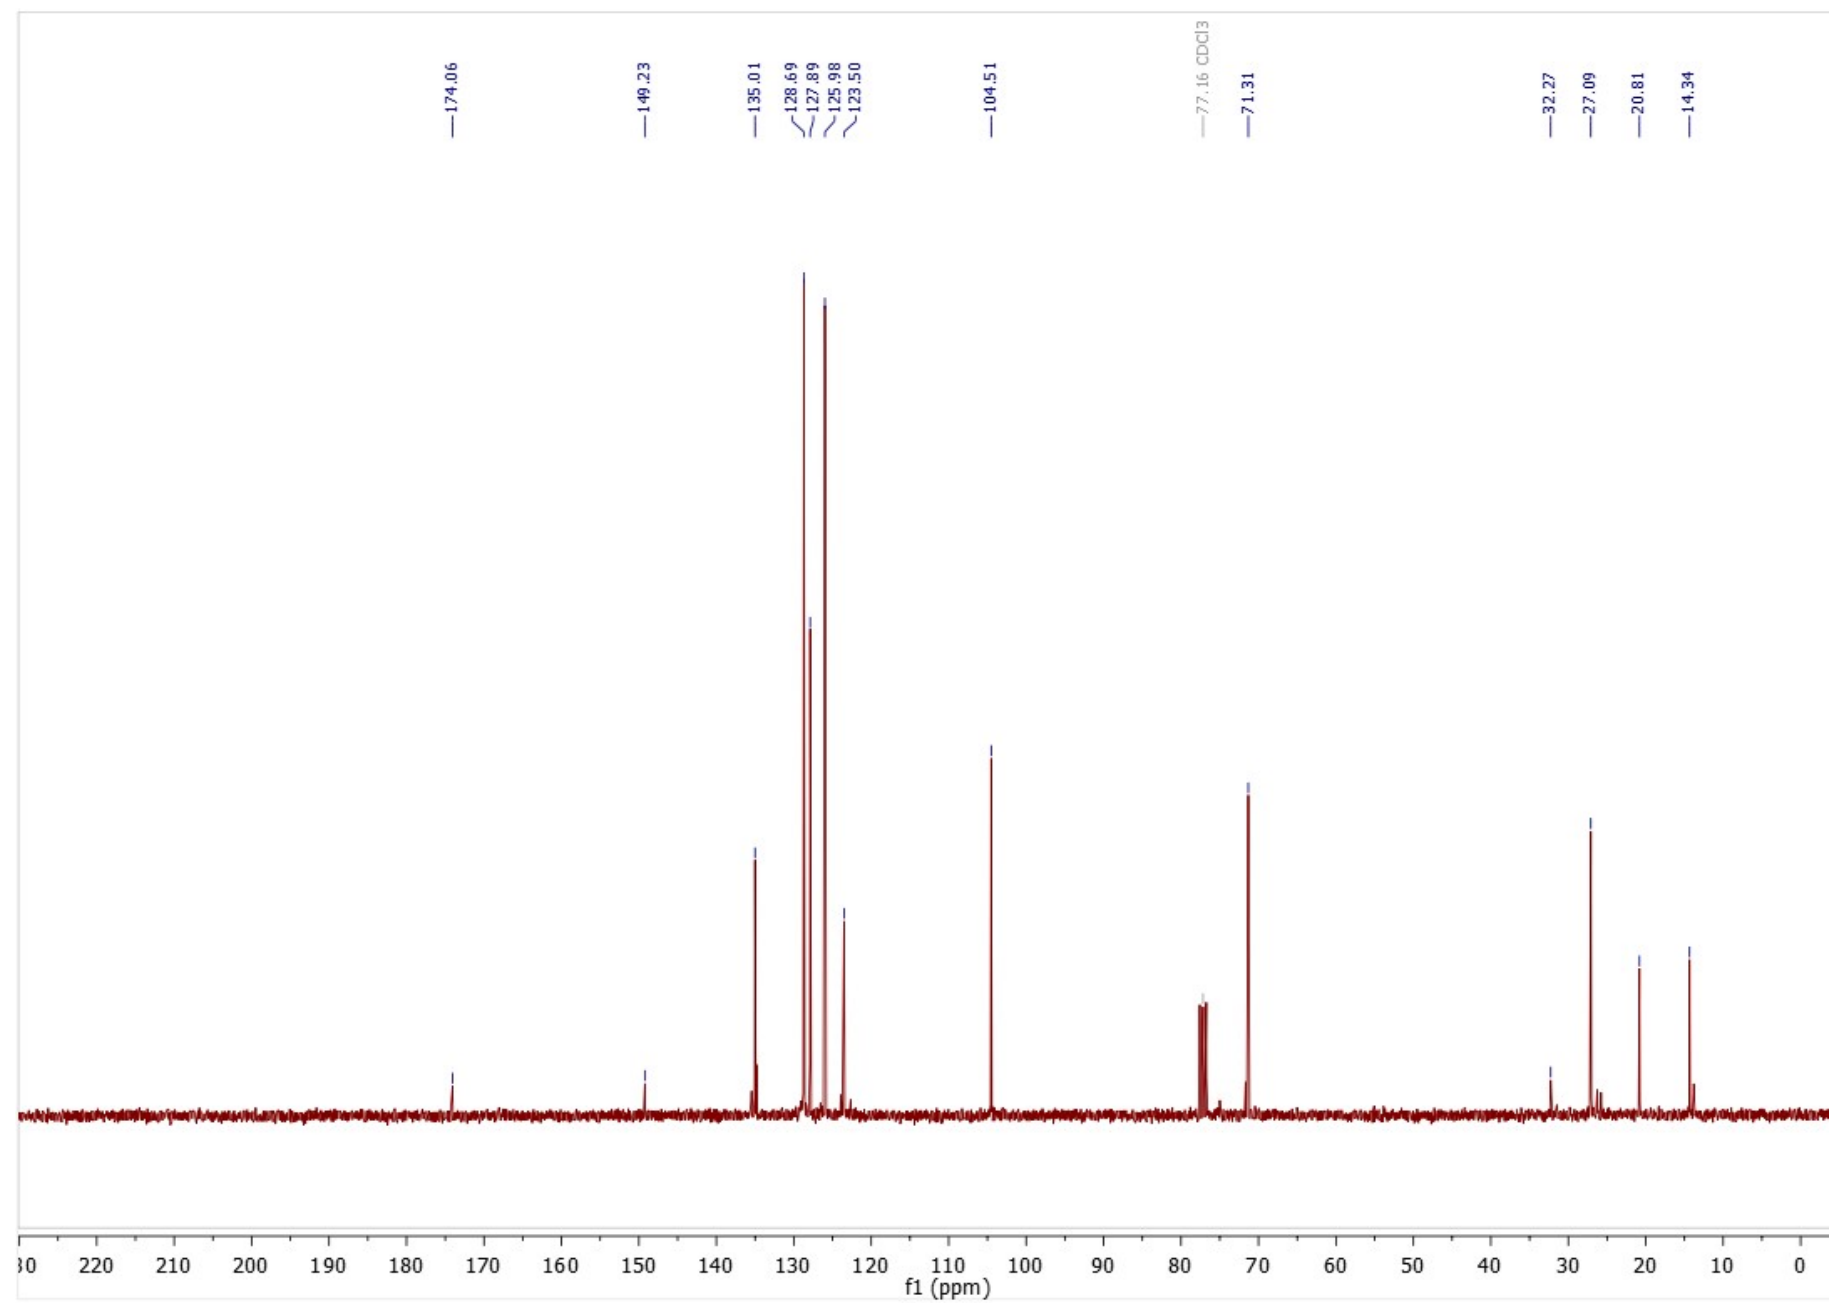

37

# 2-Ethoxy-4-(4-tolyl)thiazole (3bc)

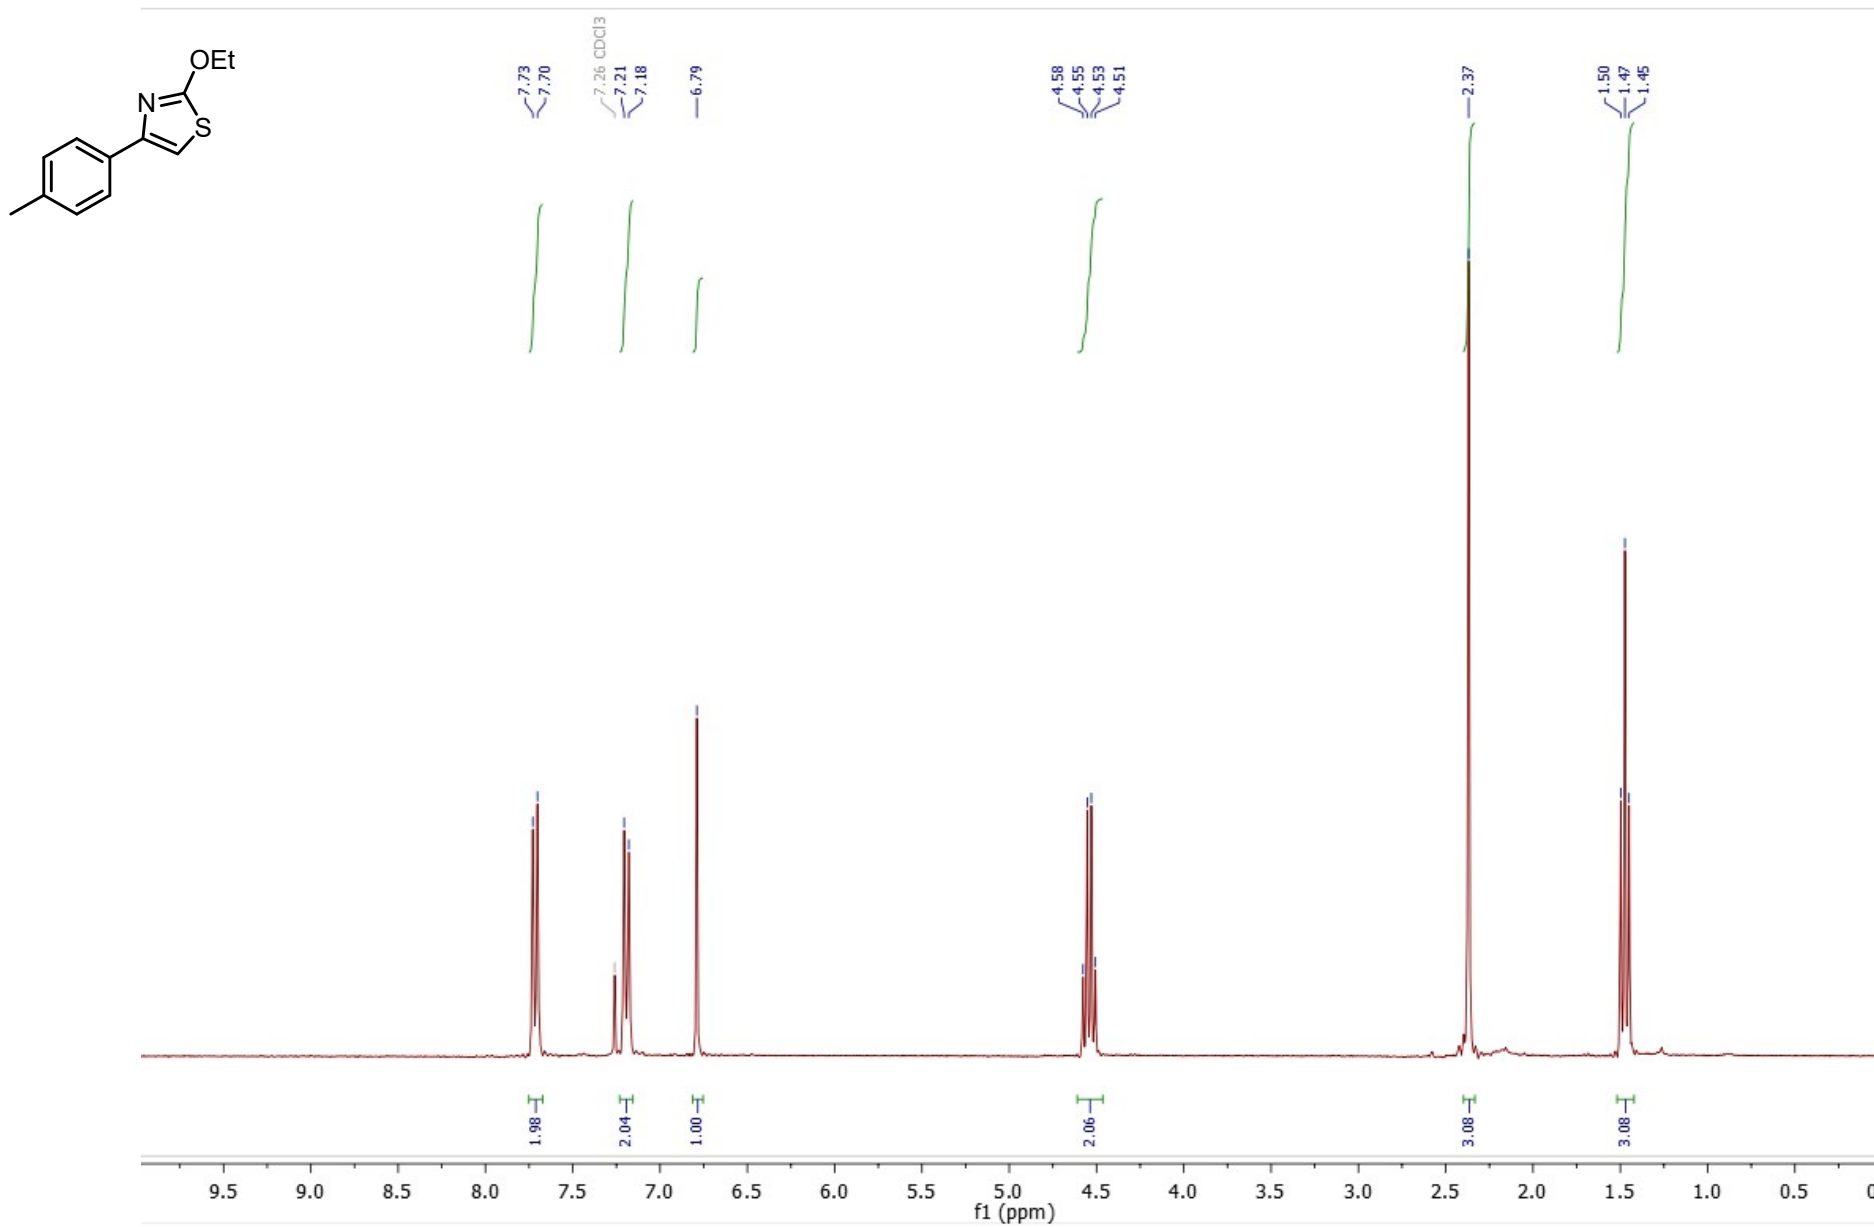

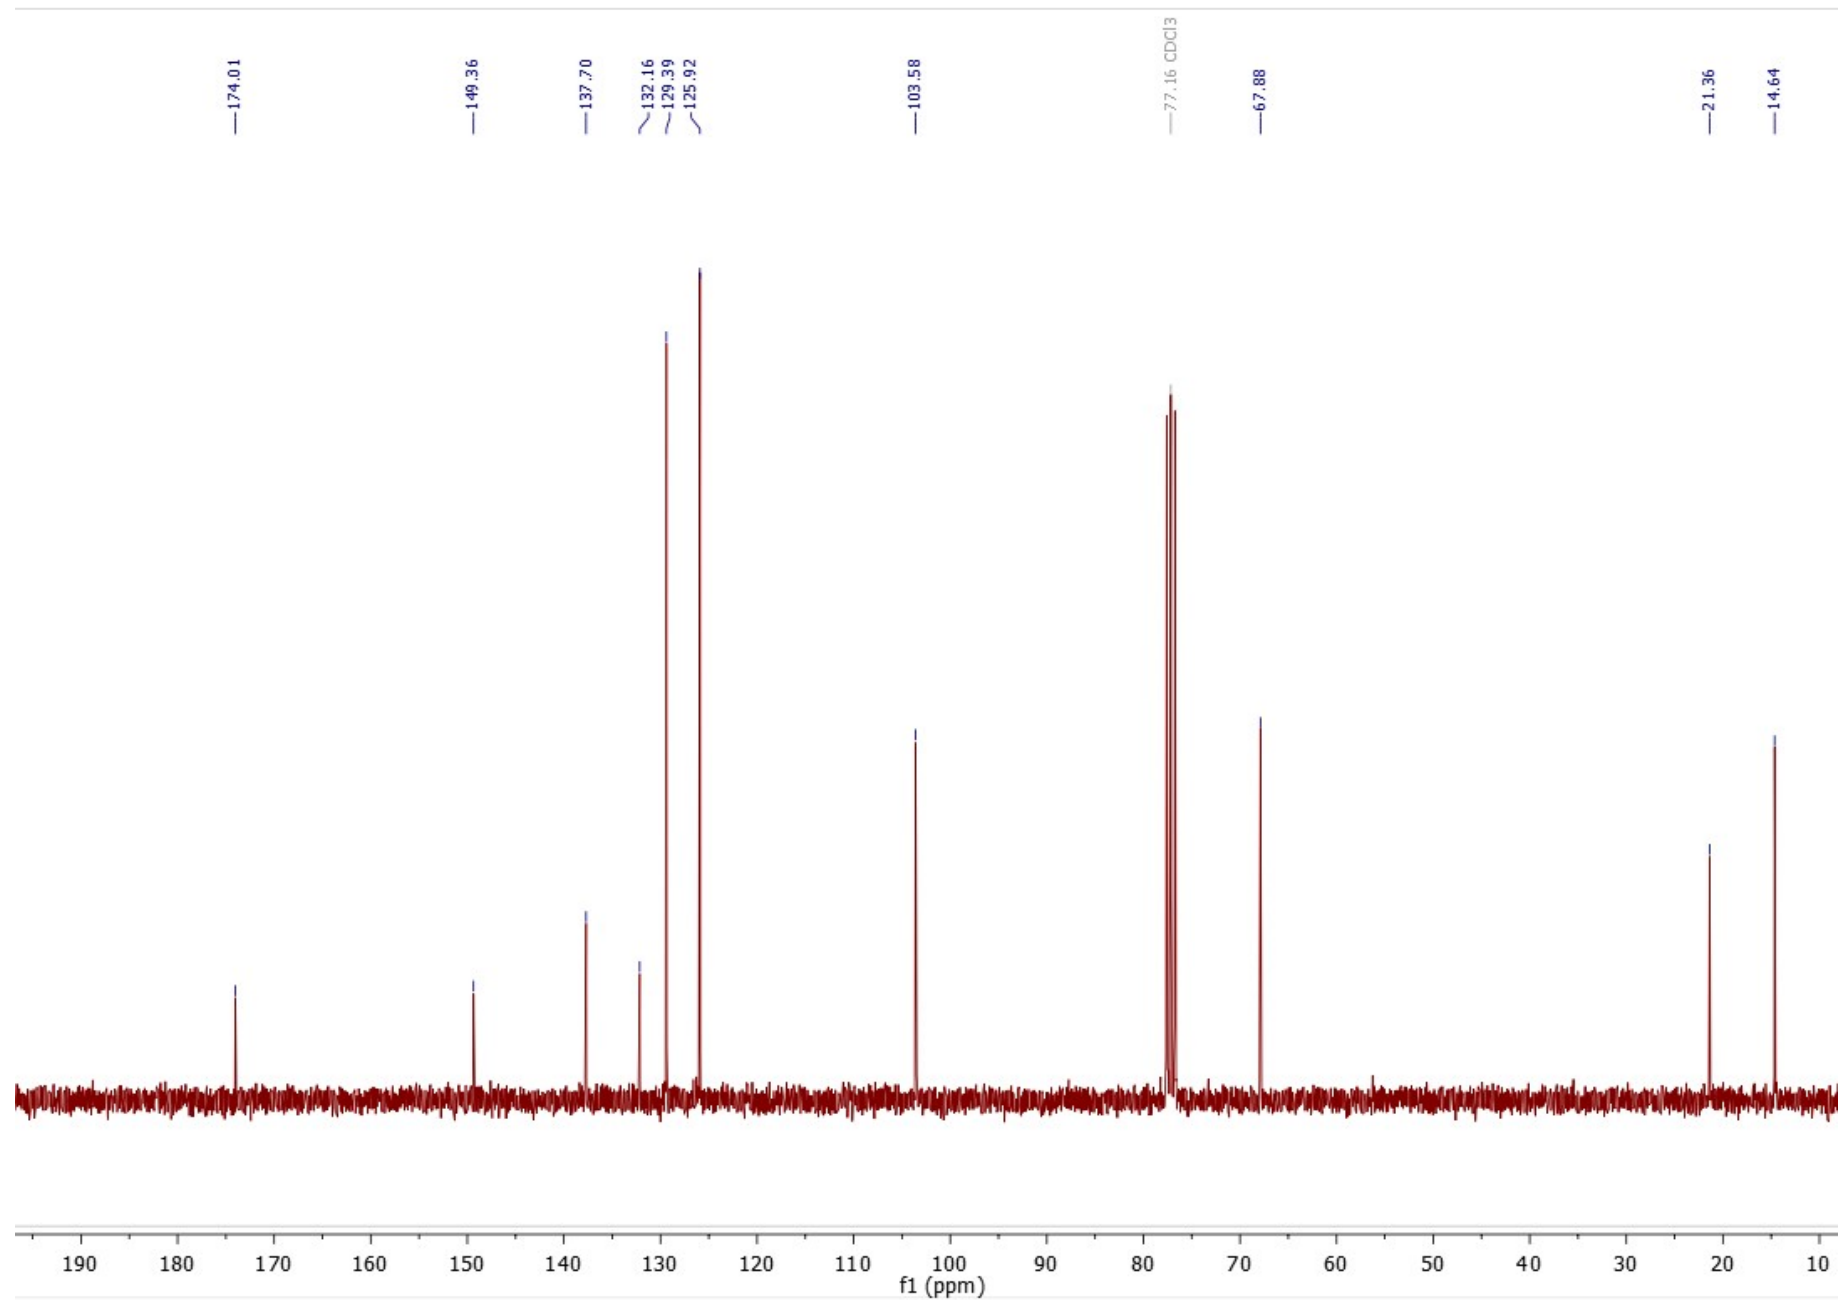

# 2-Ethoxy4-(4-(*tert*-butyl)phenyl)thiazole (3cc)

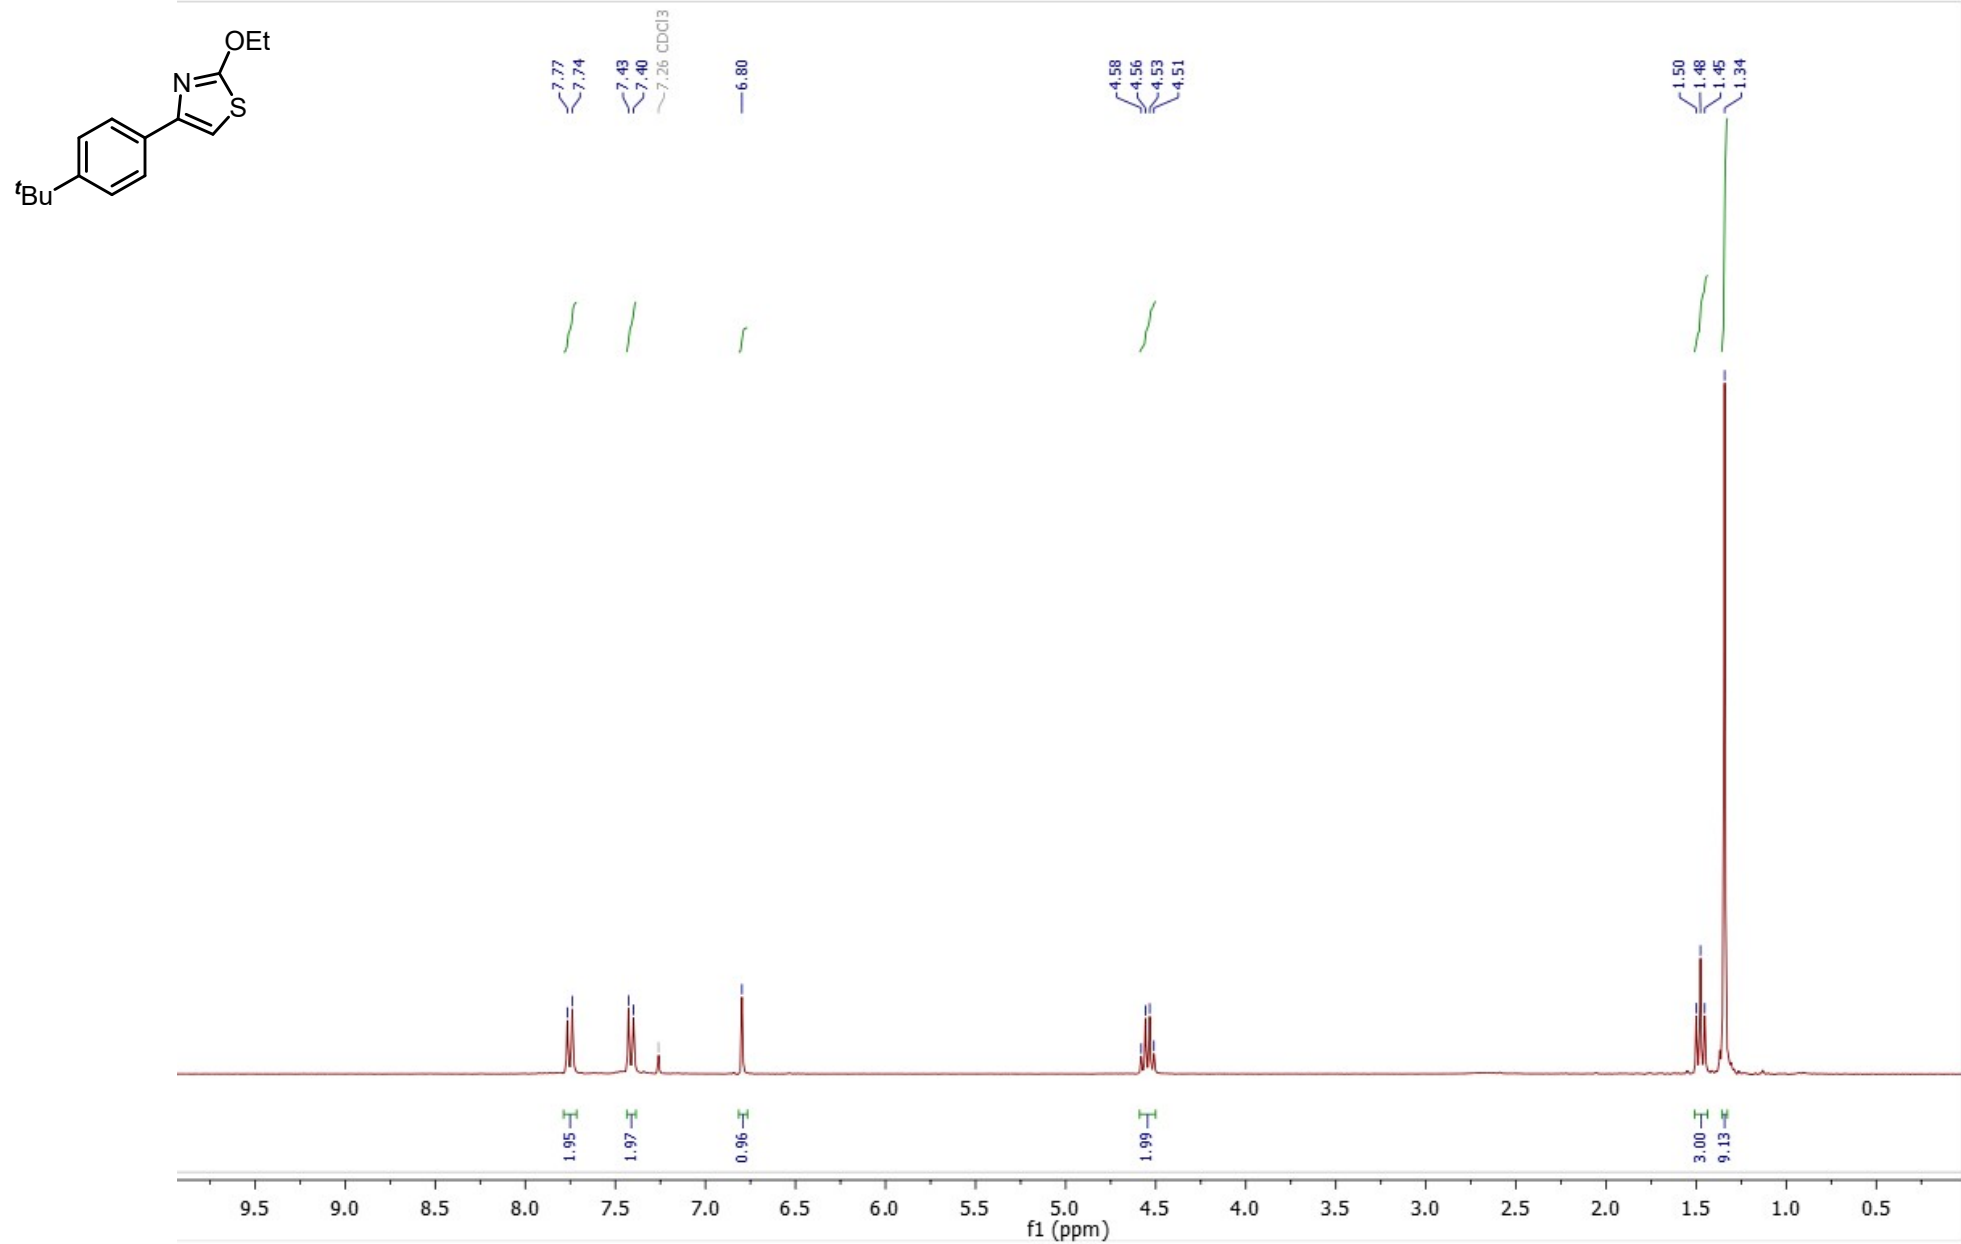

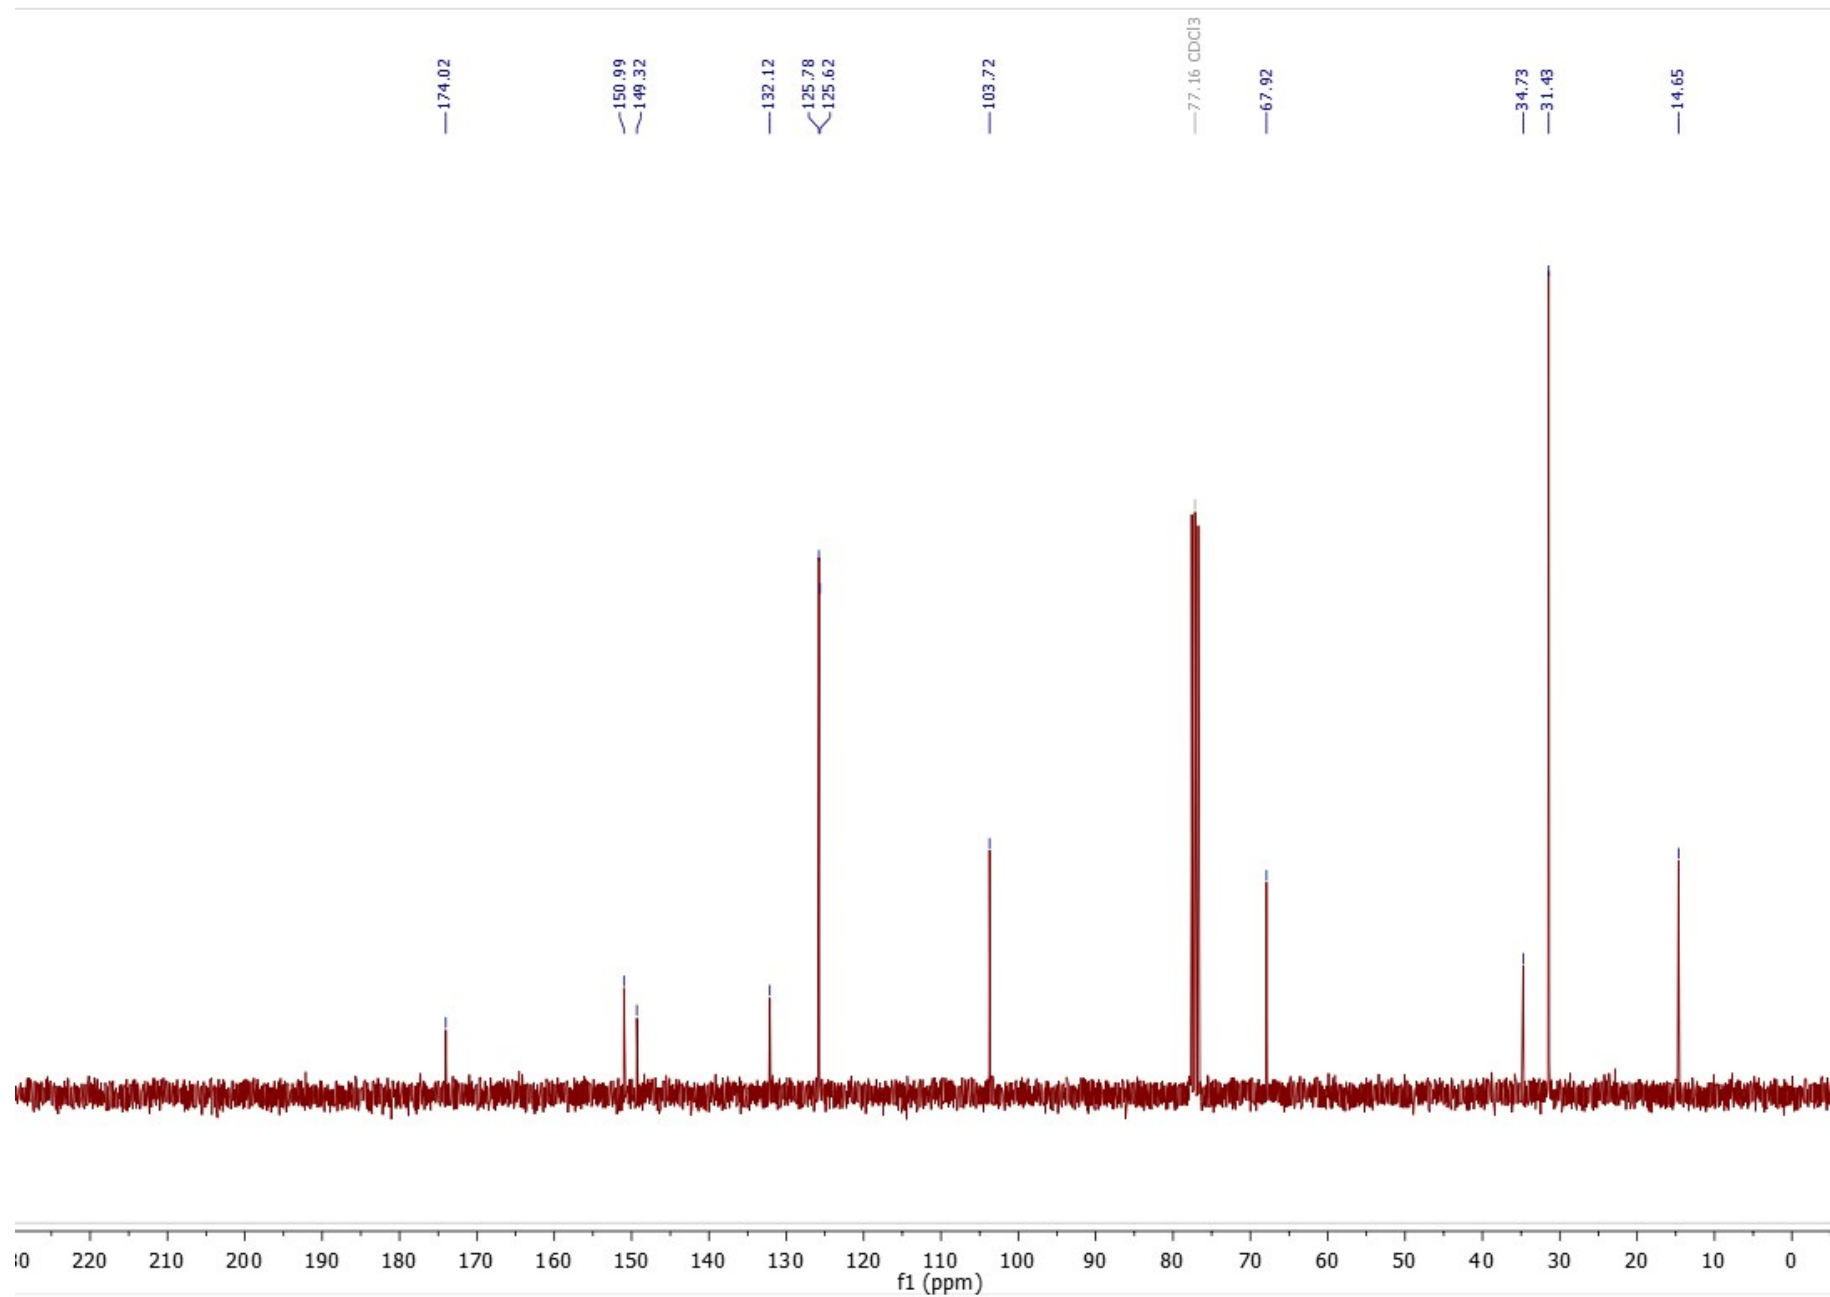

41

# 2-Ethoxy-4-(4-methoxyphenyl)thiazole (3dc)

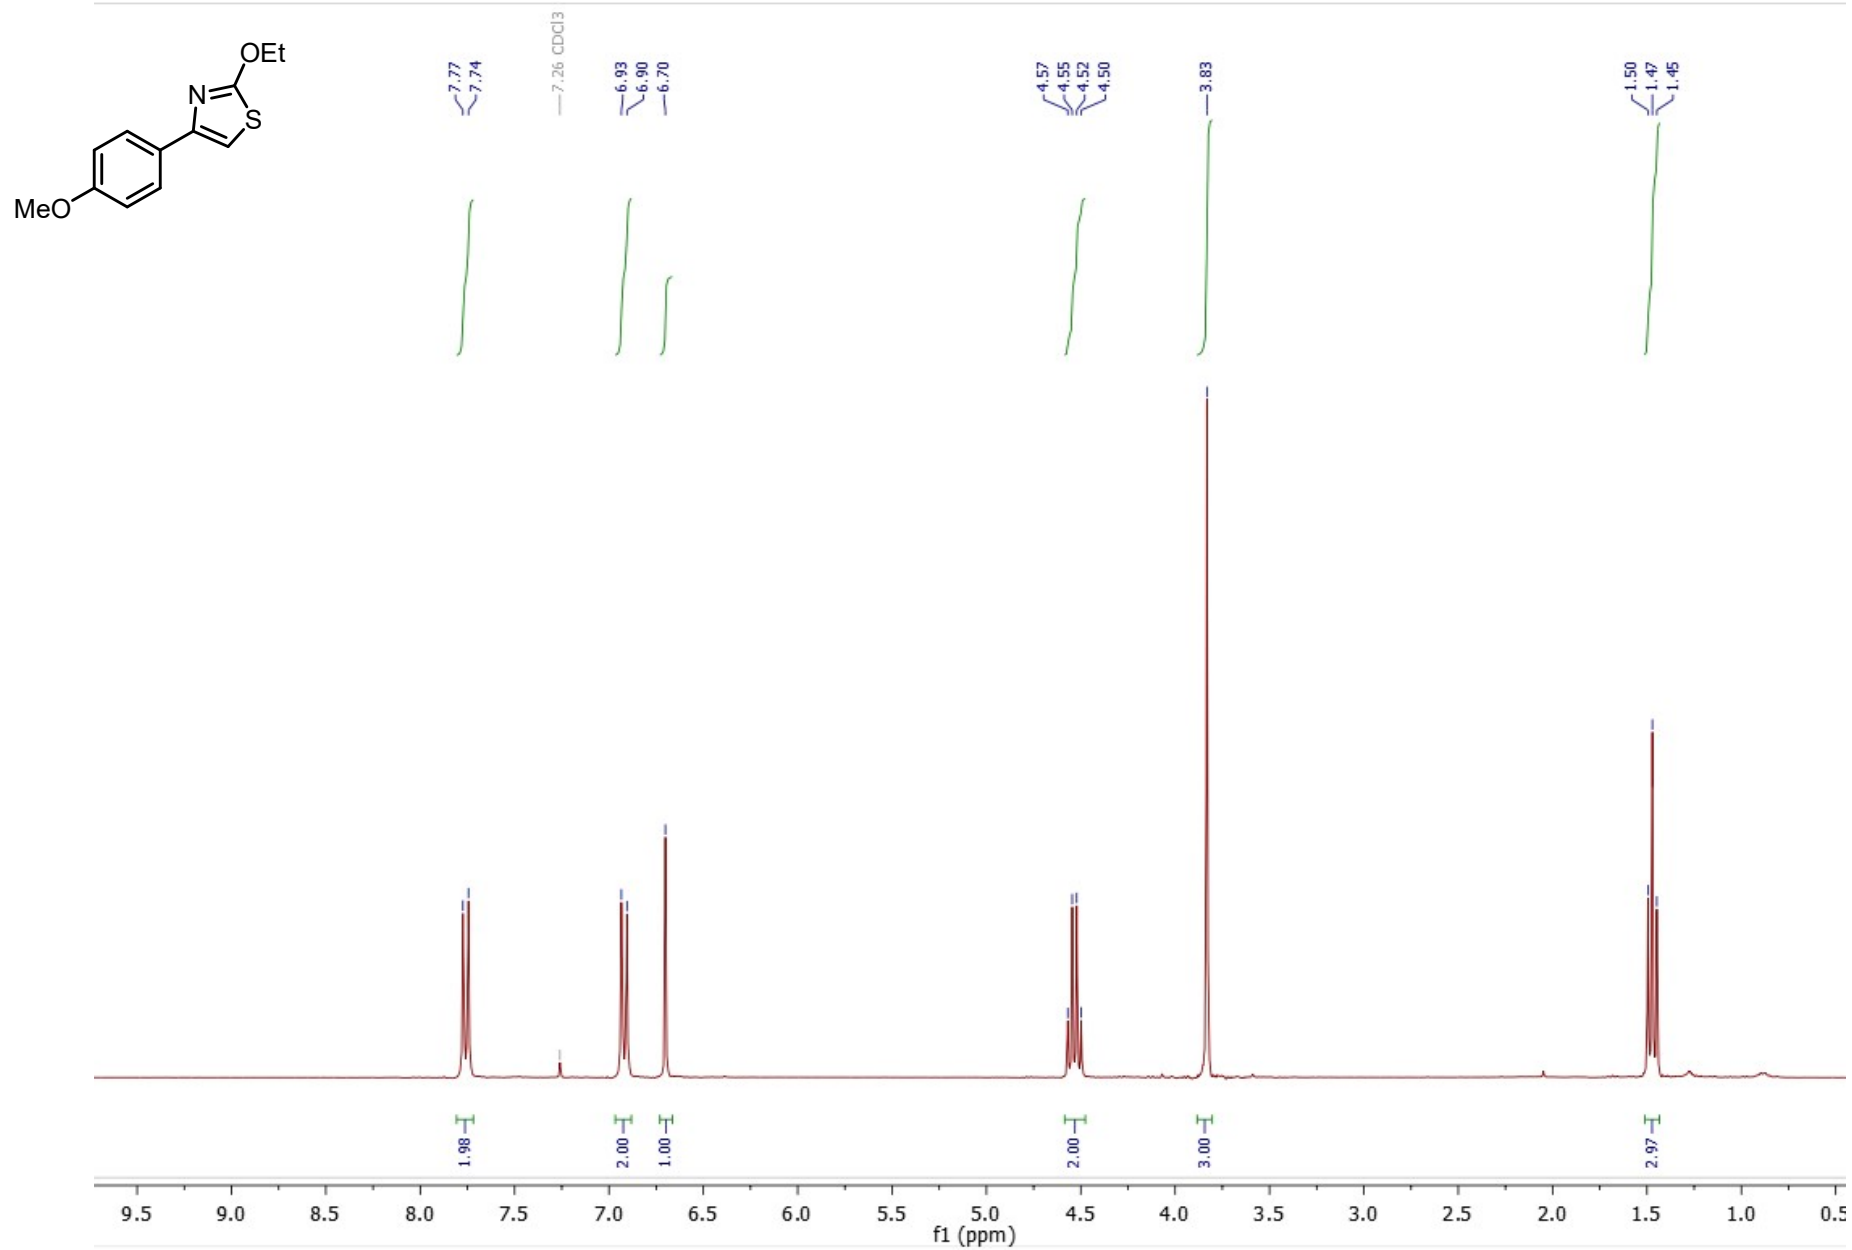

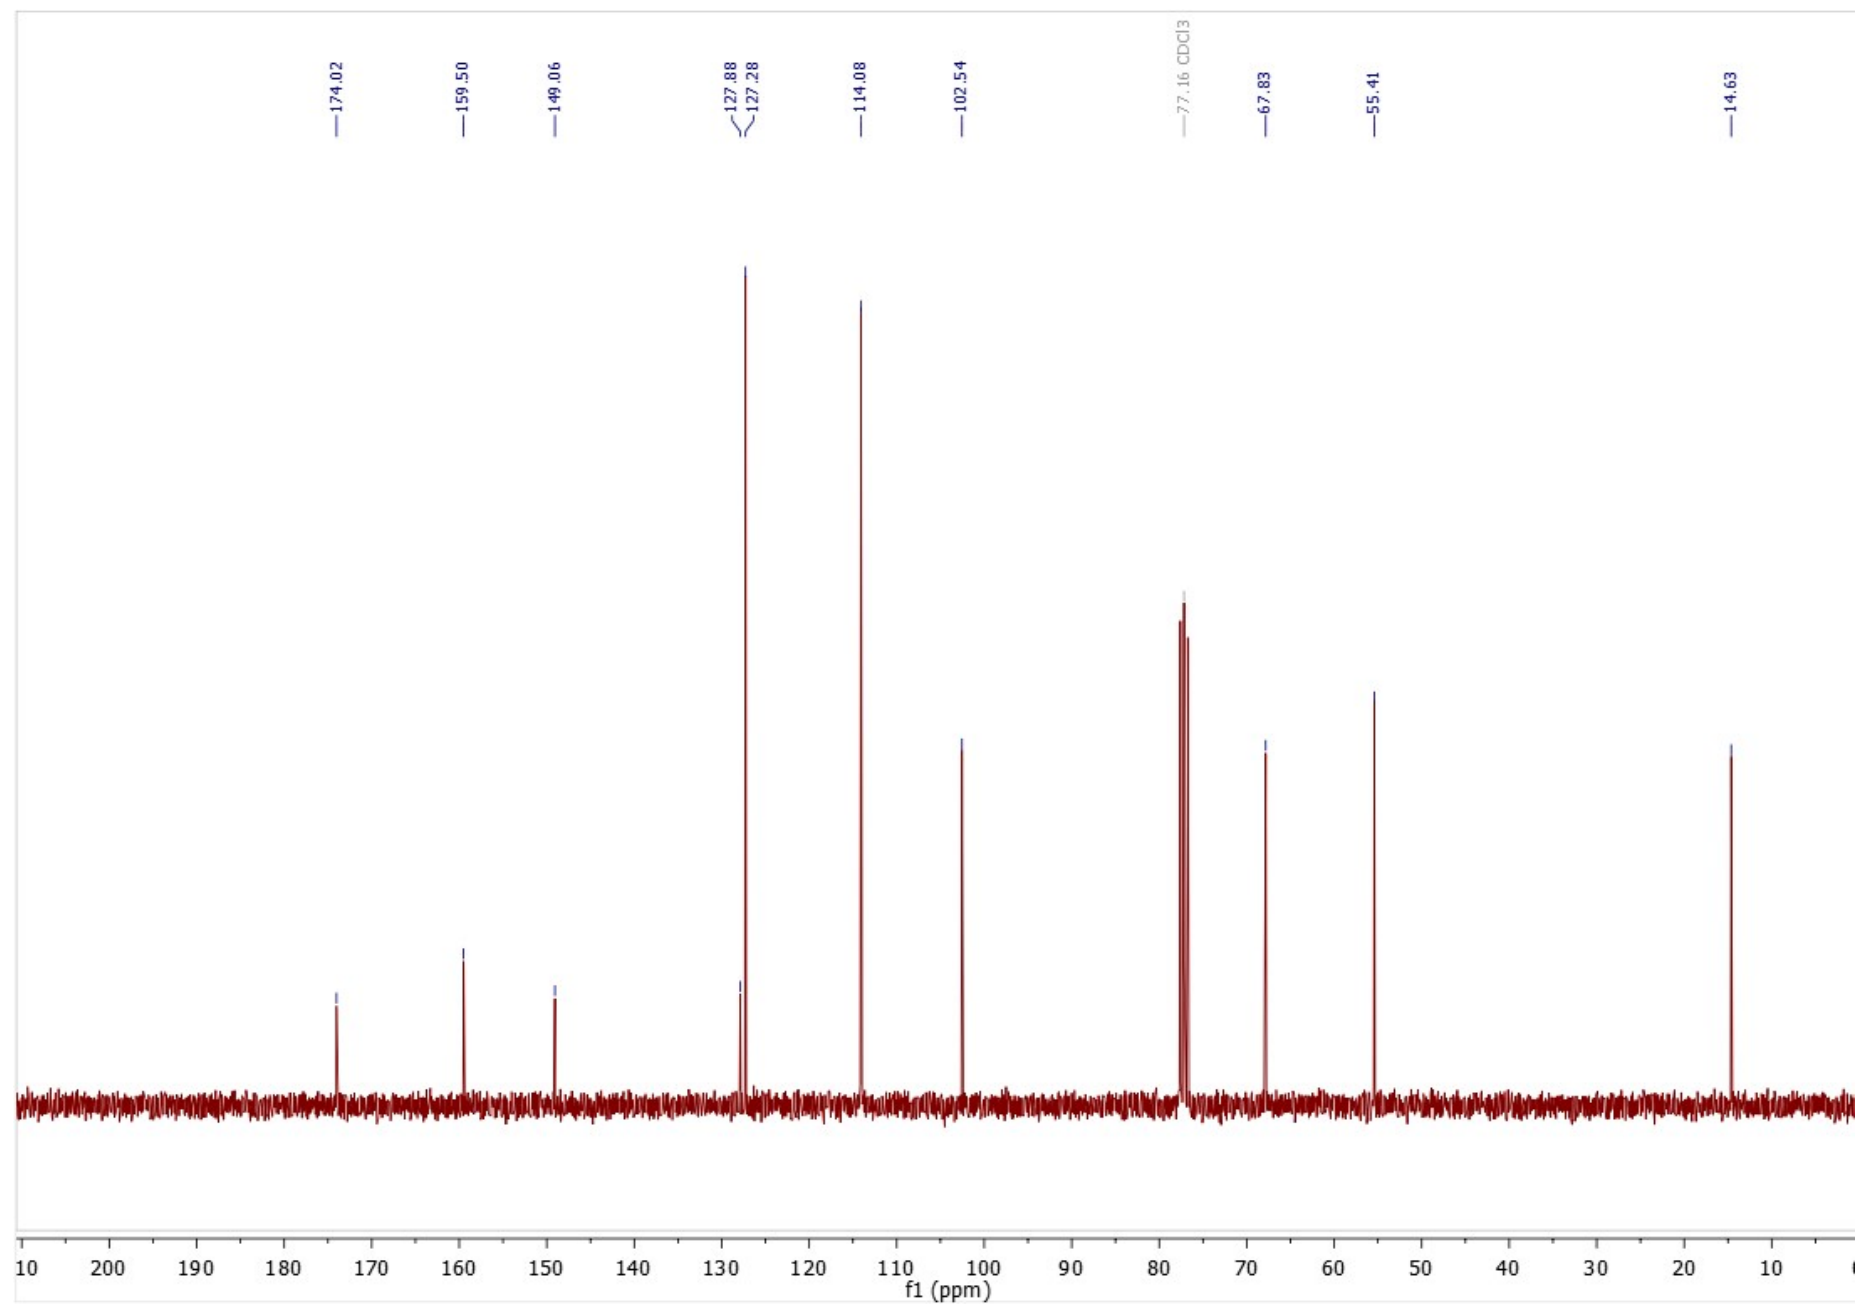

## 2-Ethoxy-4-(2-methoxyphenyl)thiazole (3ec)

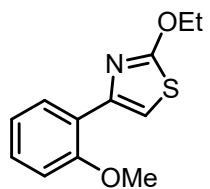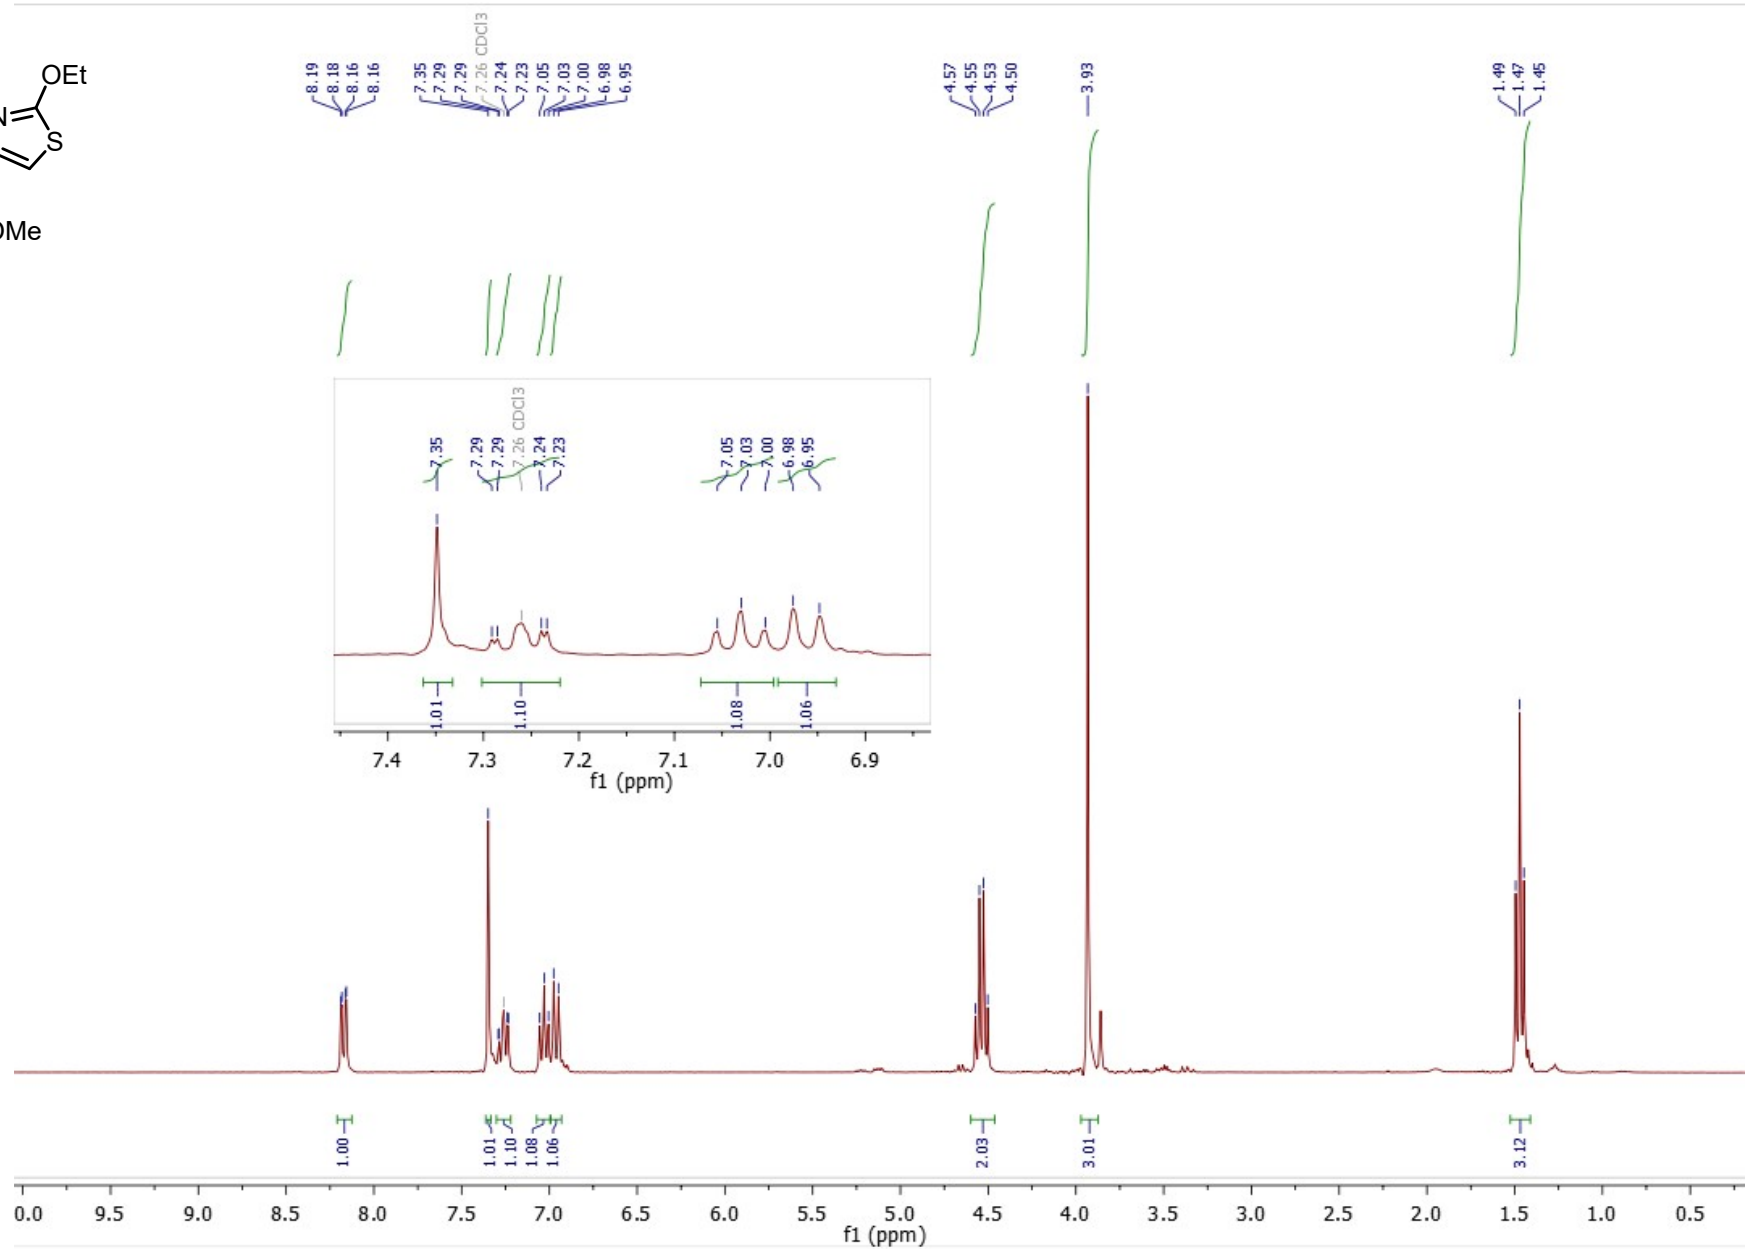

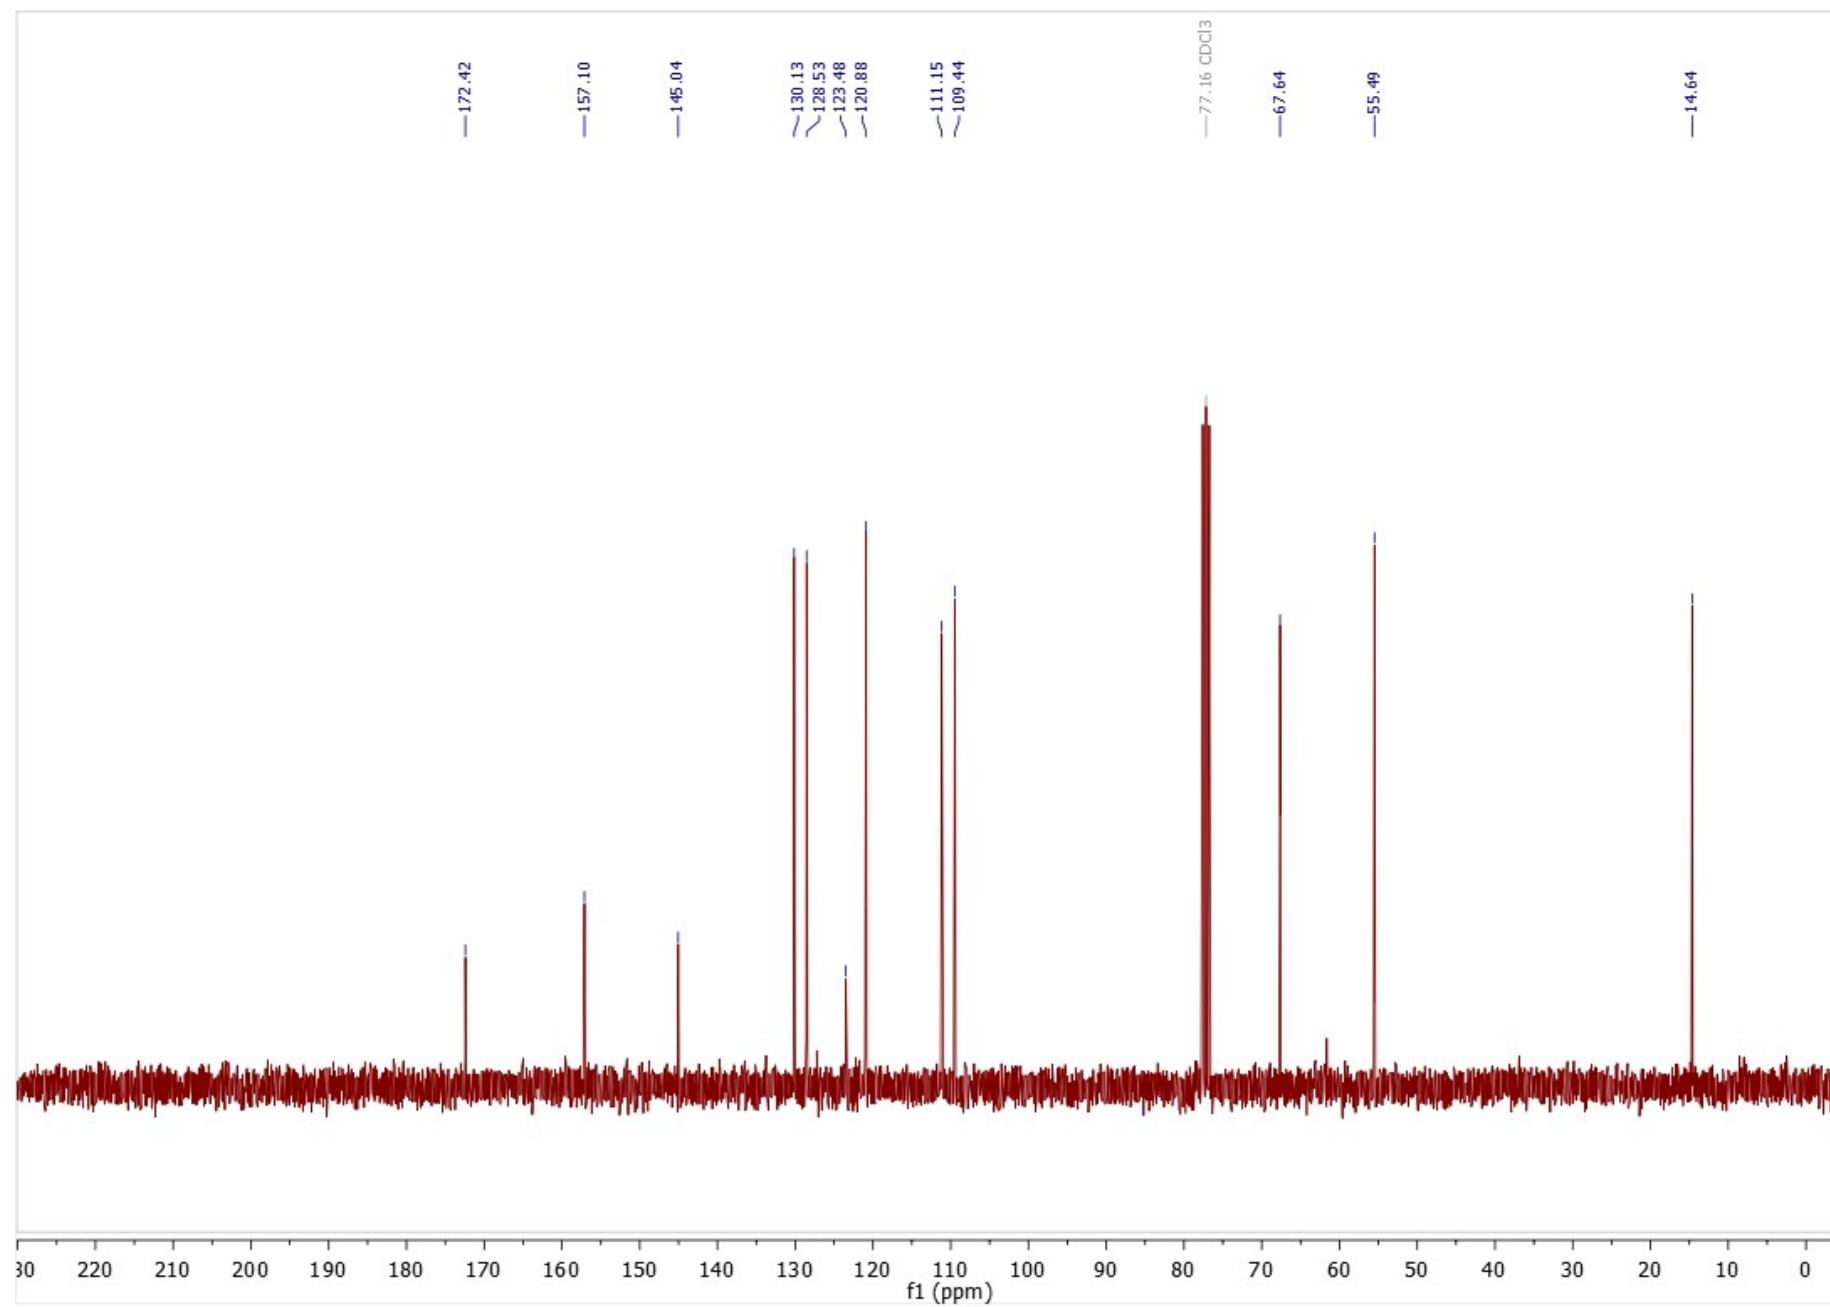

# 2-Ethoxy-4-(4-fluorophenyl)thiazole (3fc)

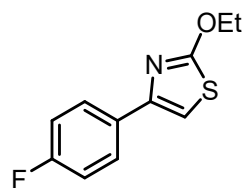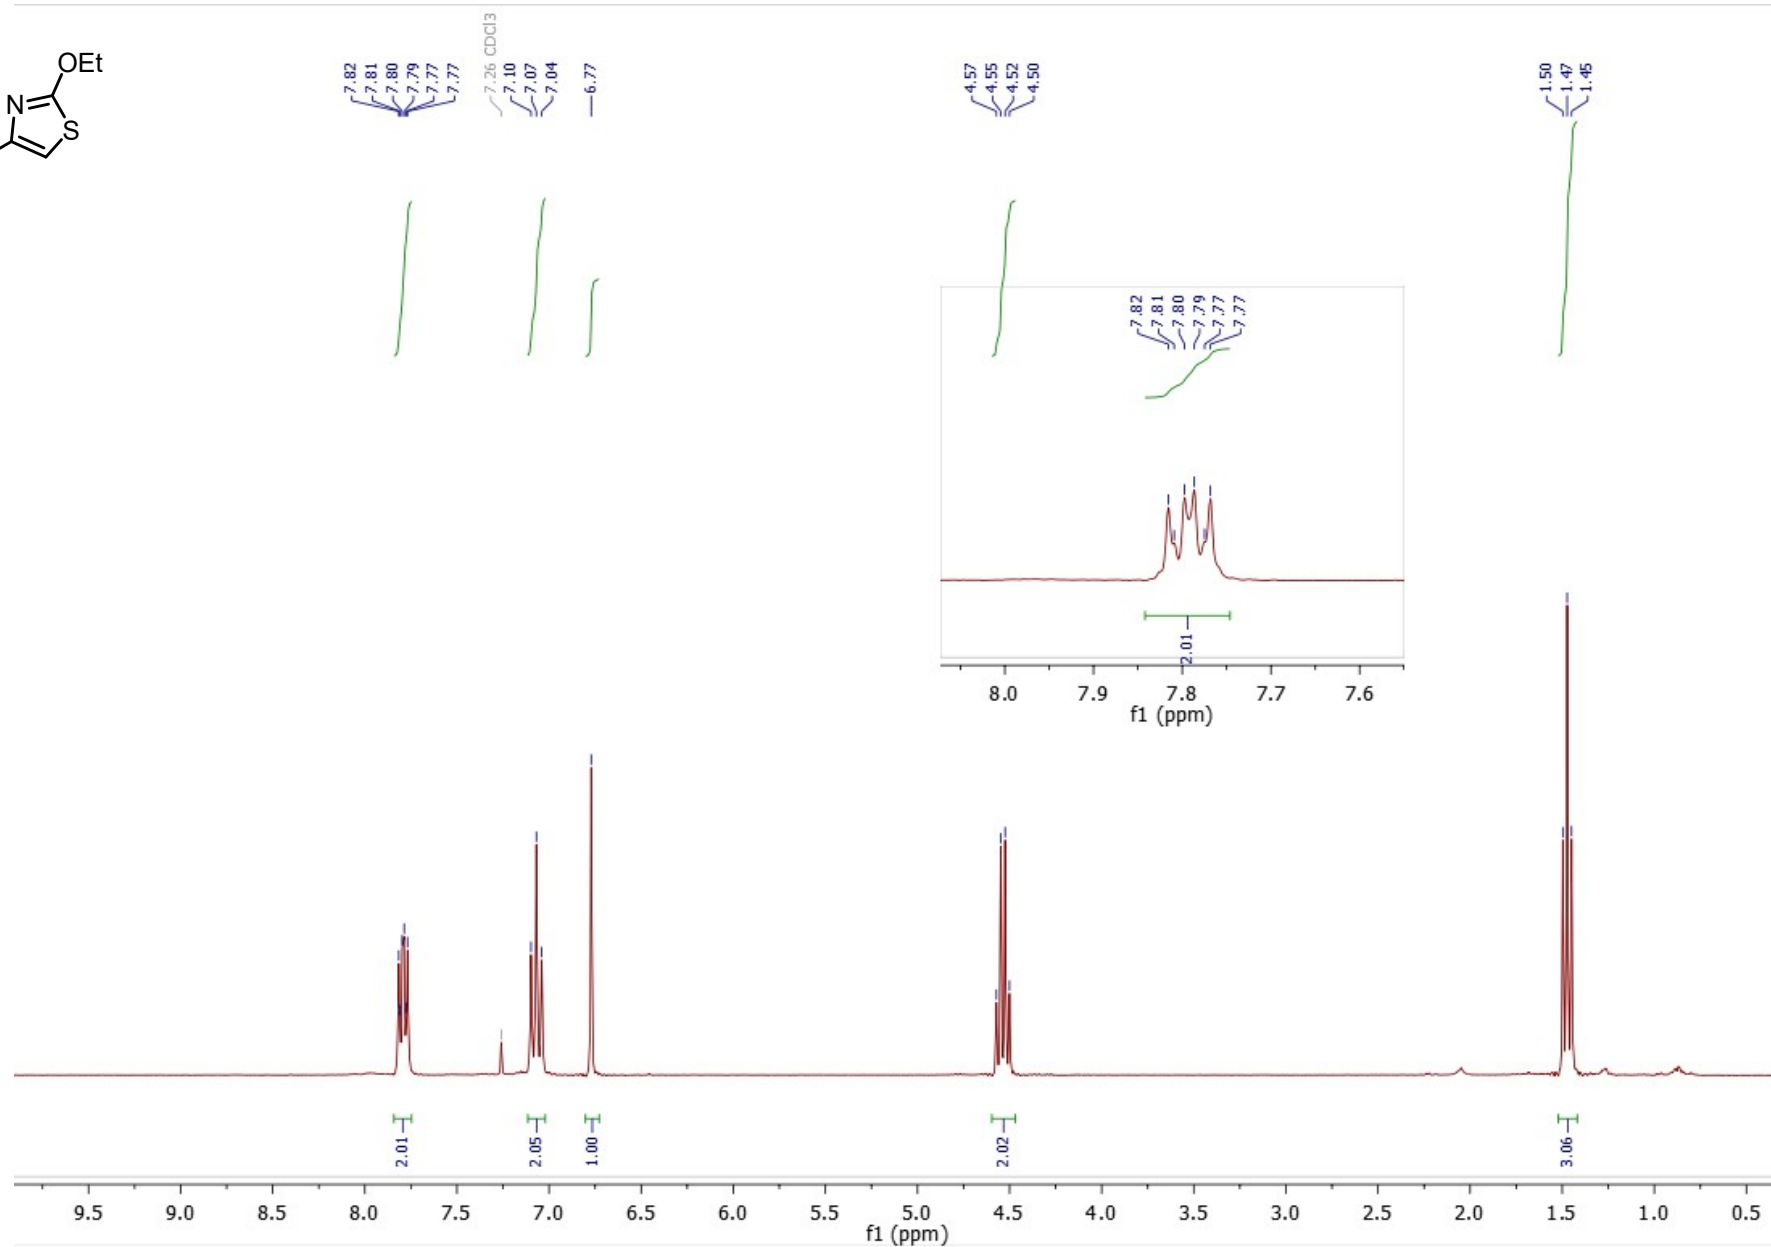

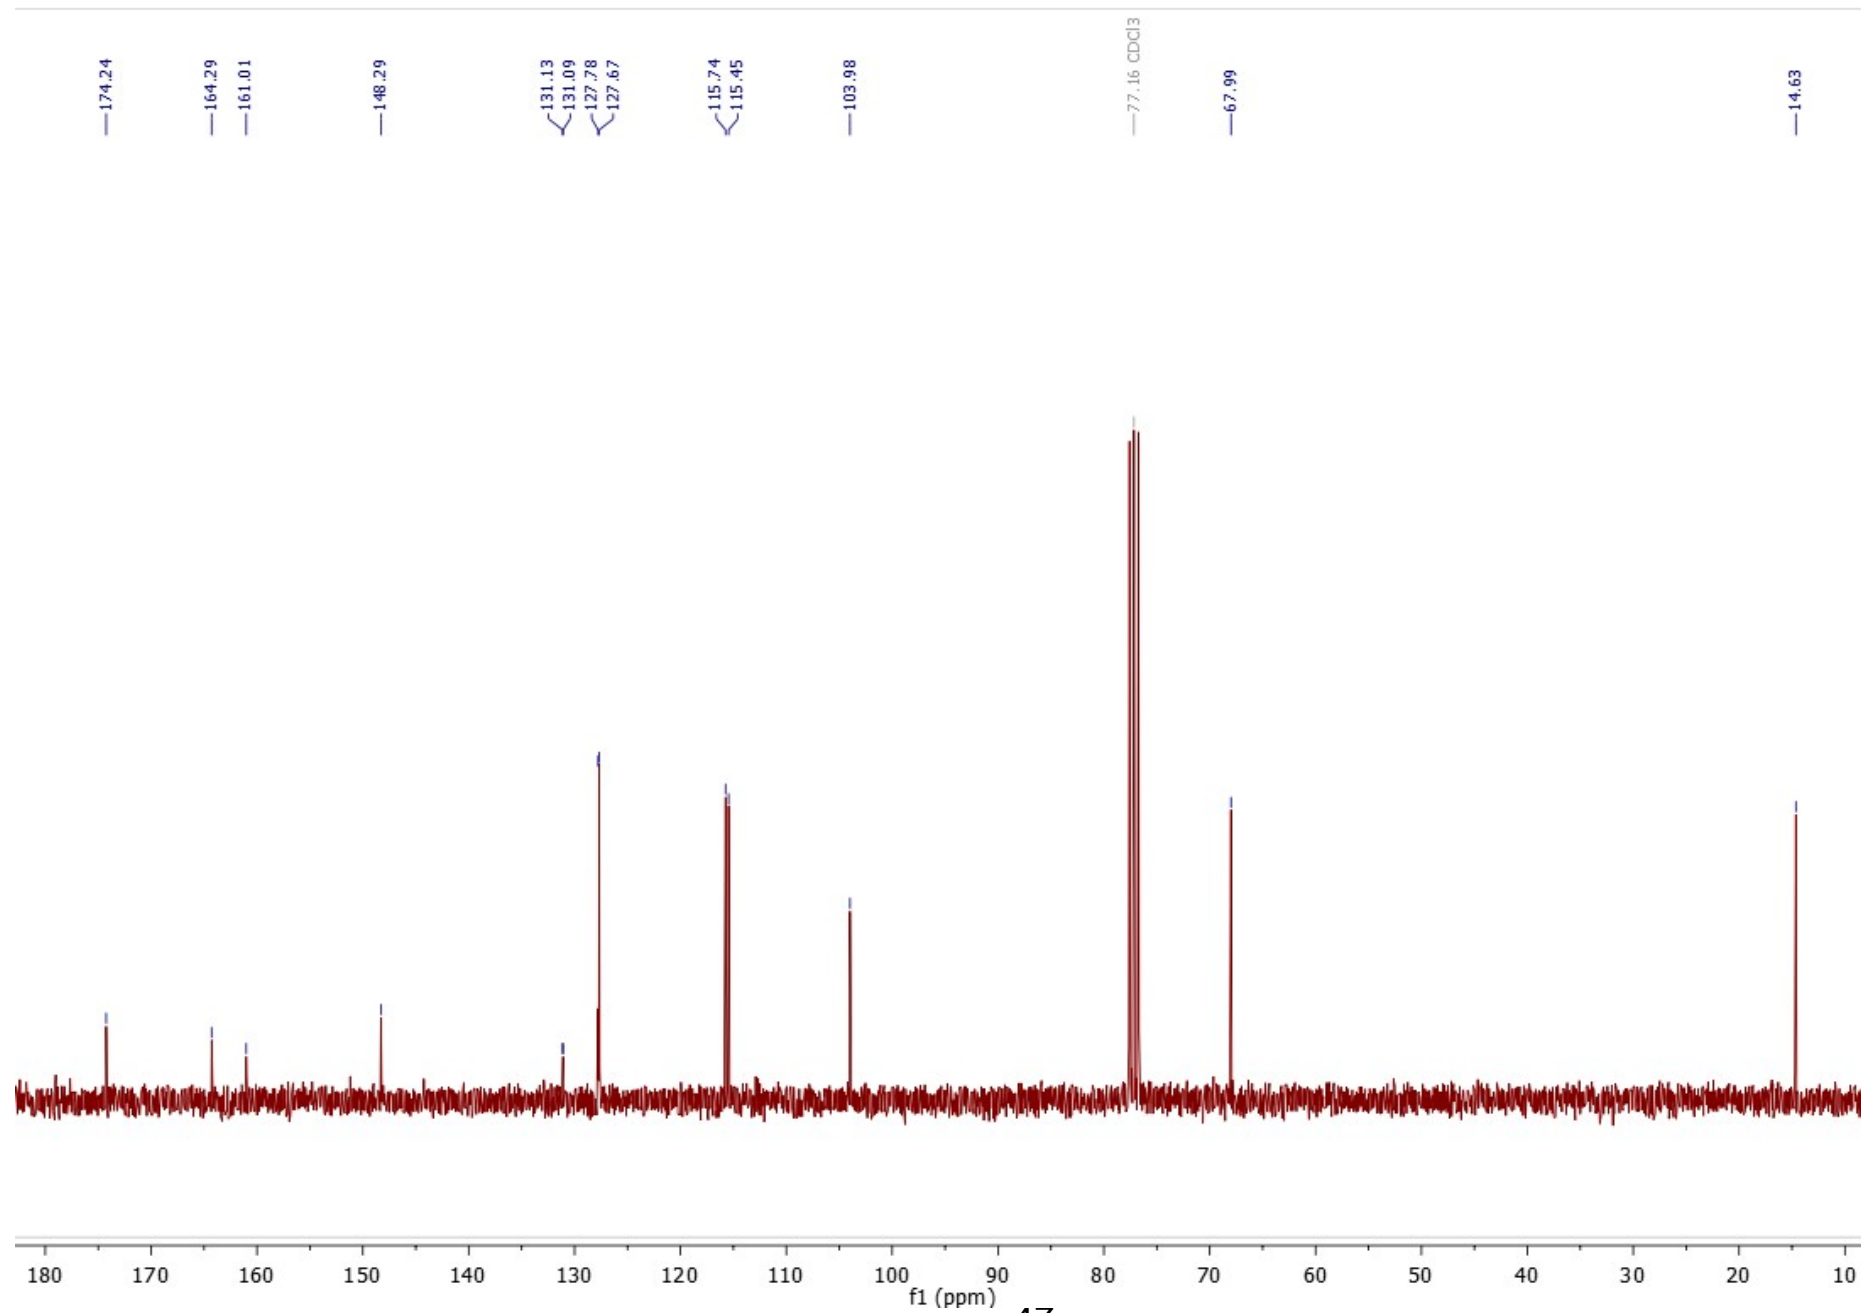

# 2-Ethoxy-4-(4-chlorophenyl)thiazole (3gc)

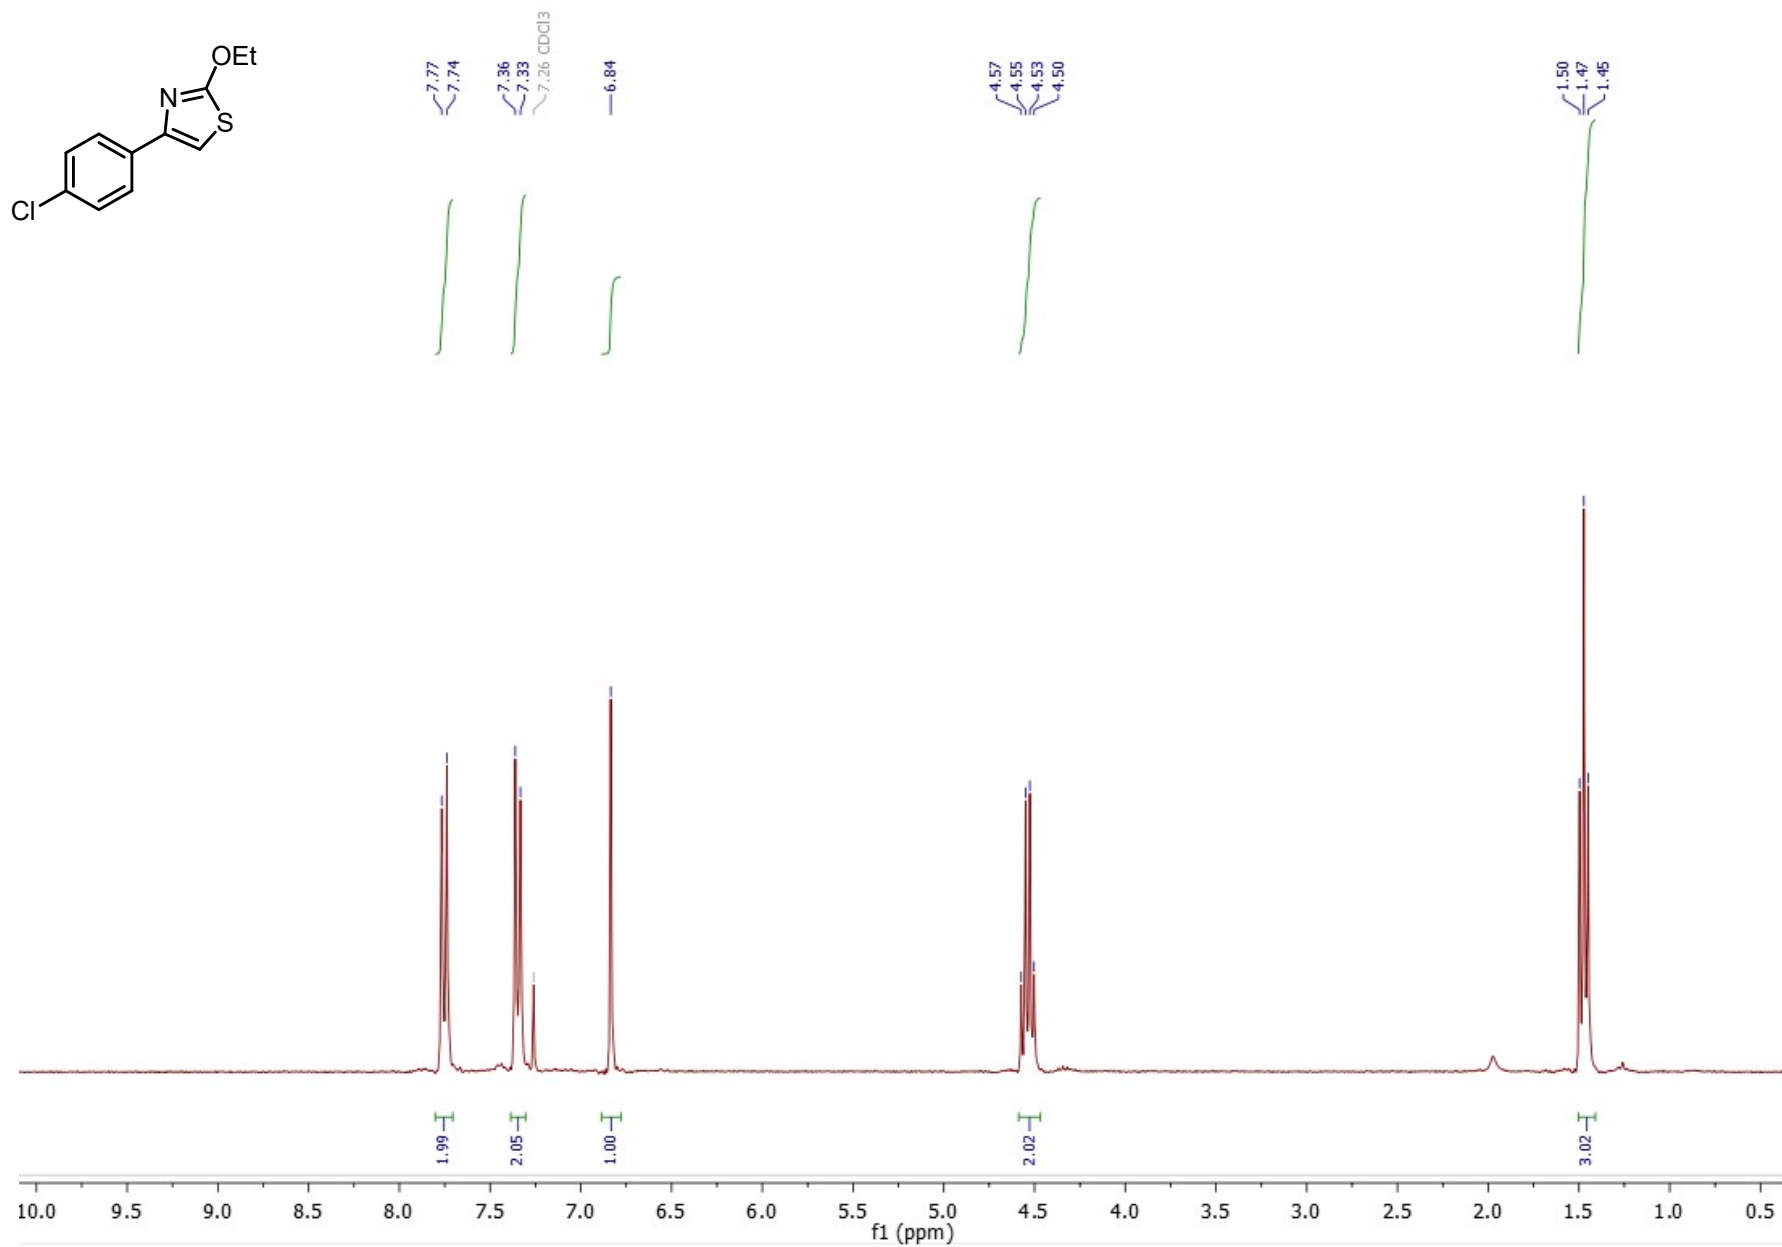

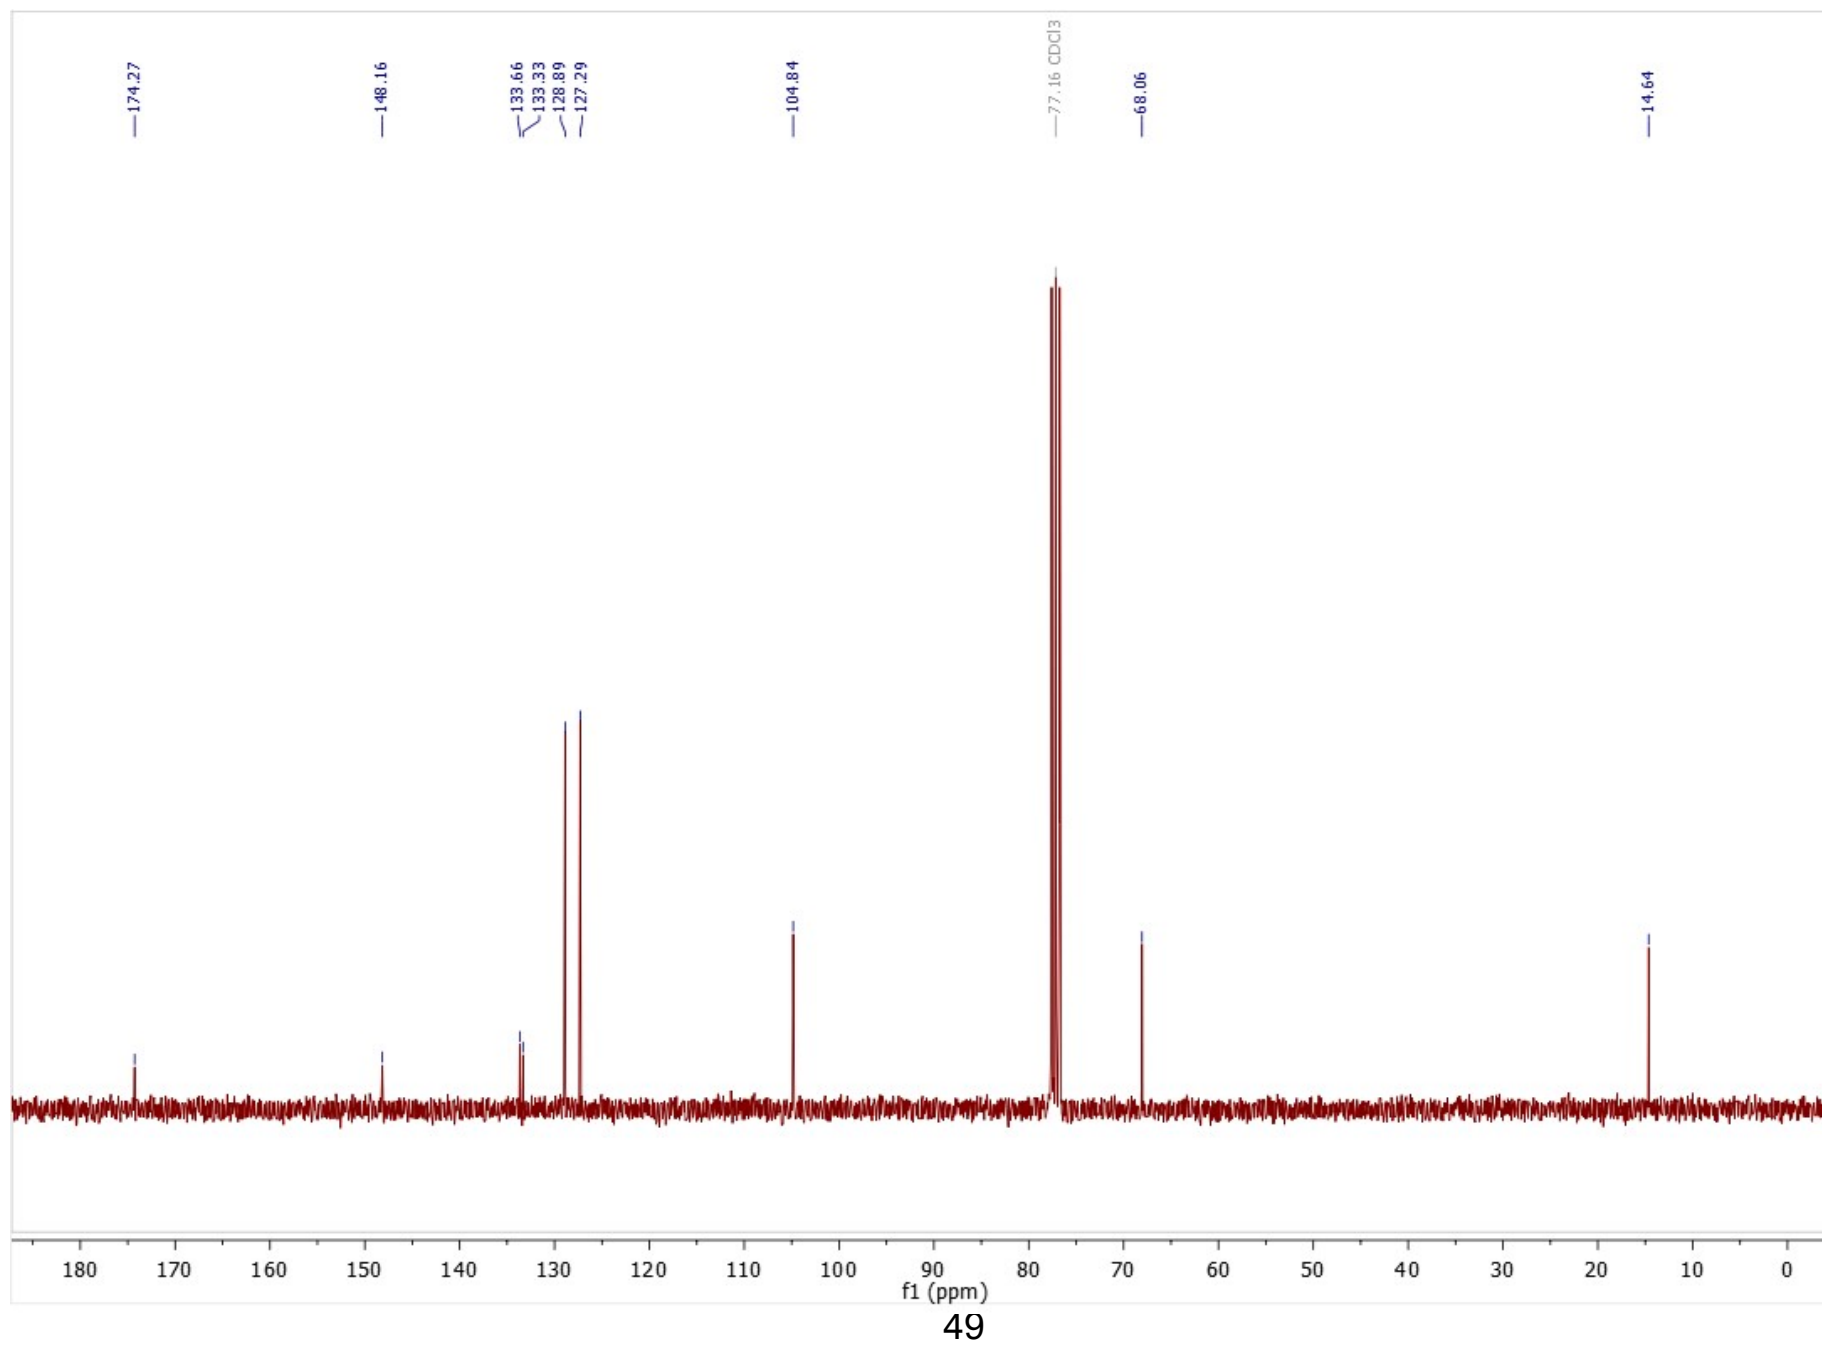

## 2-Ethoxy-4-(3-bromophenyl)thiazole (3hc)

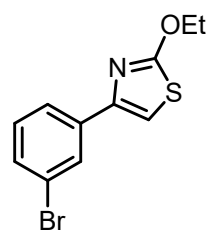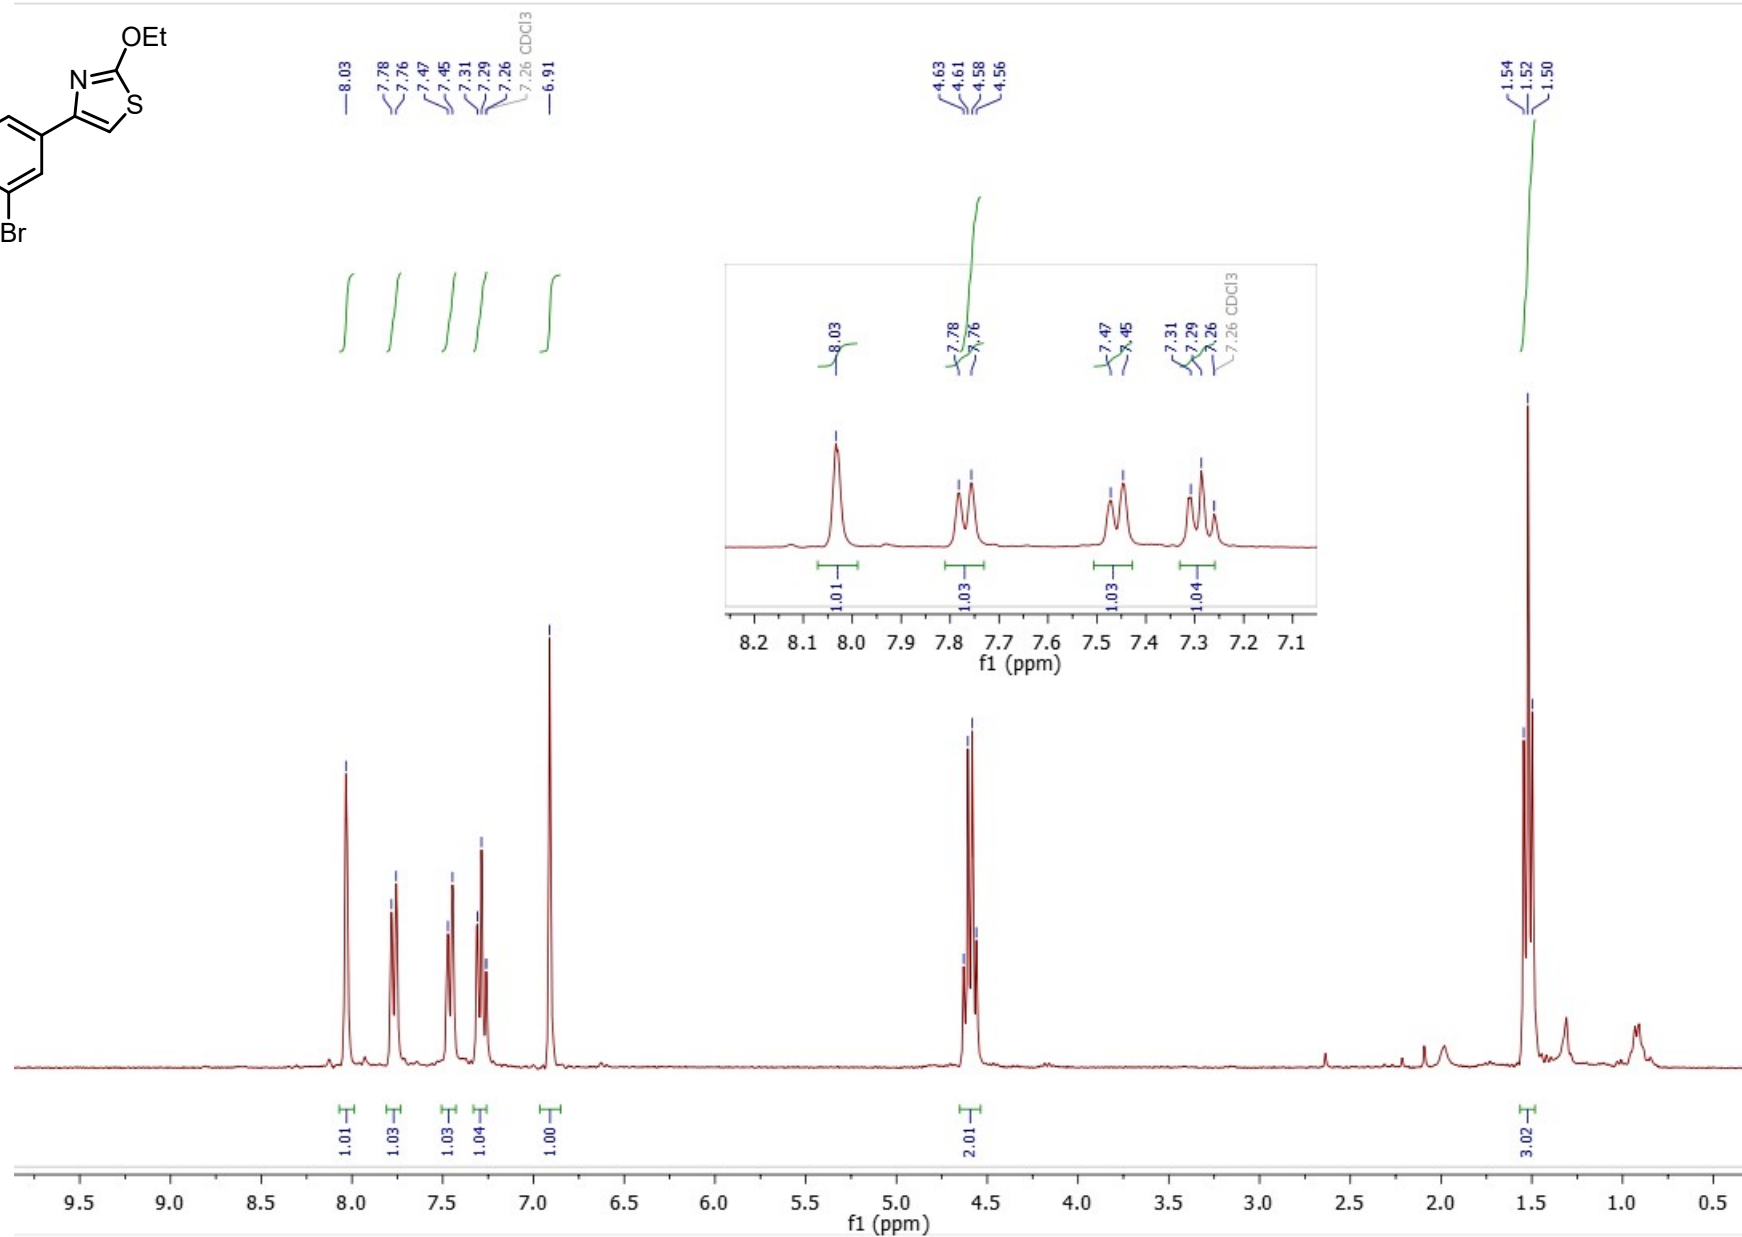

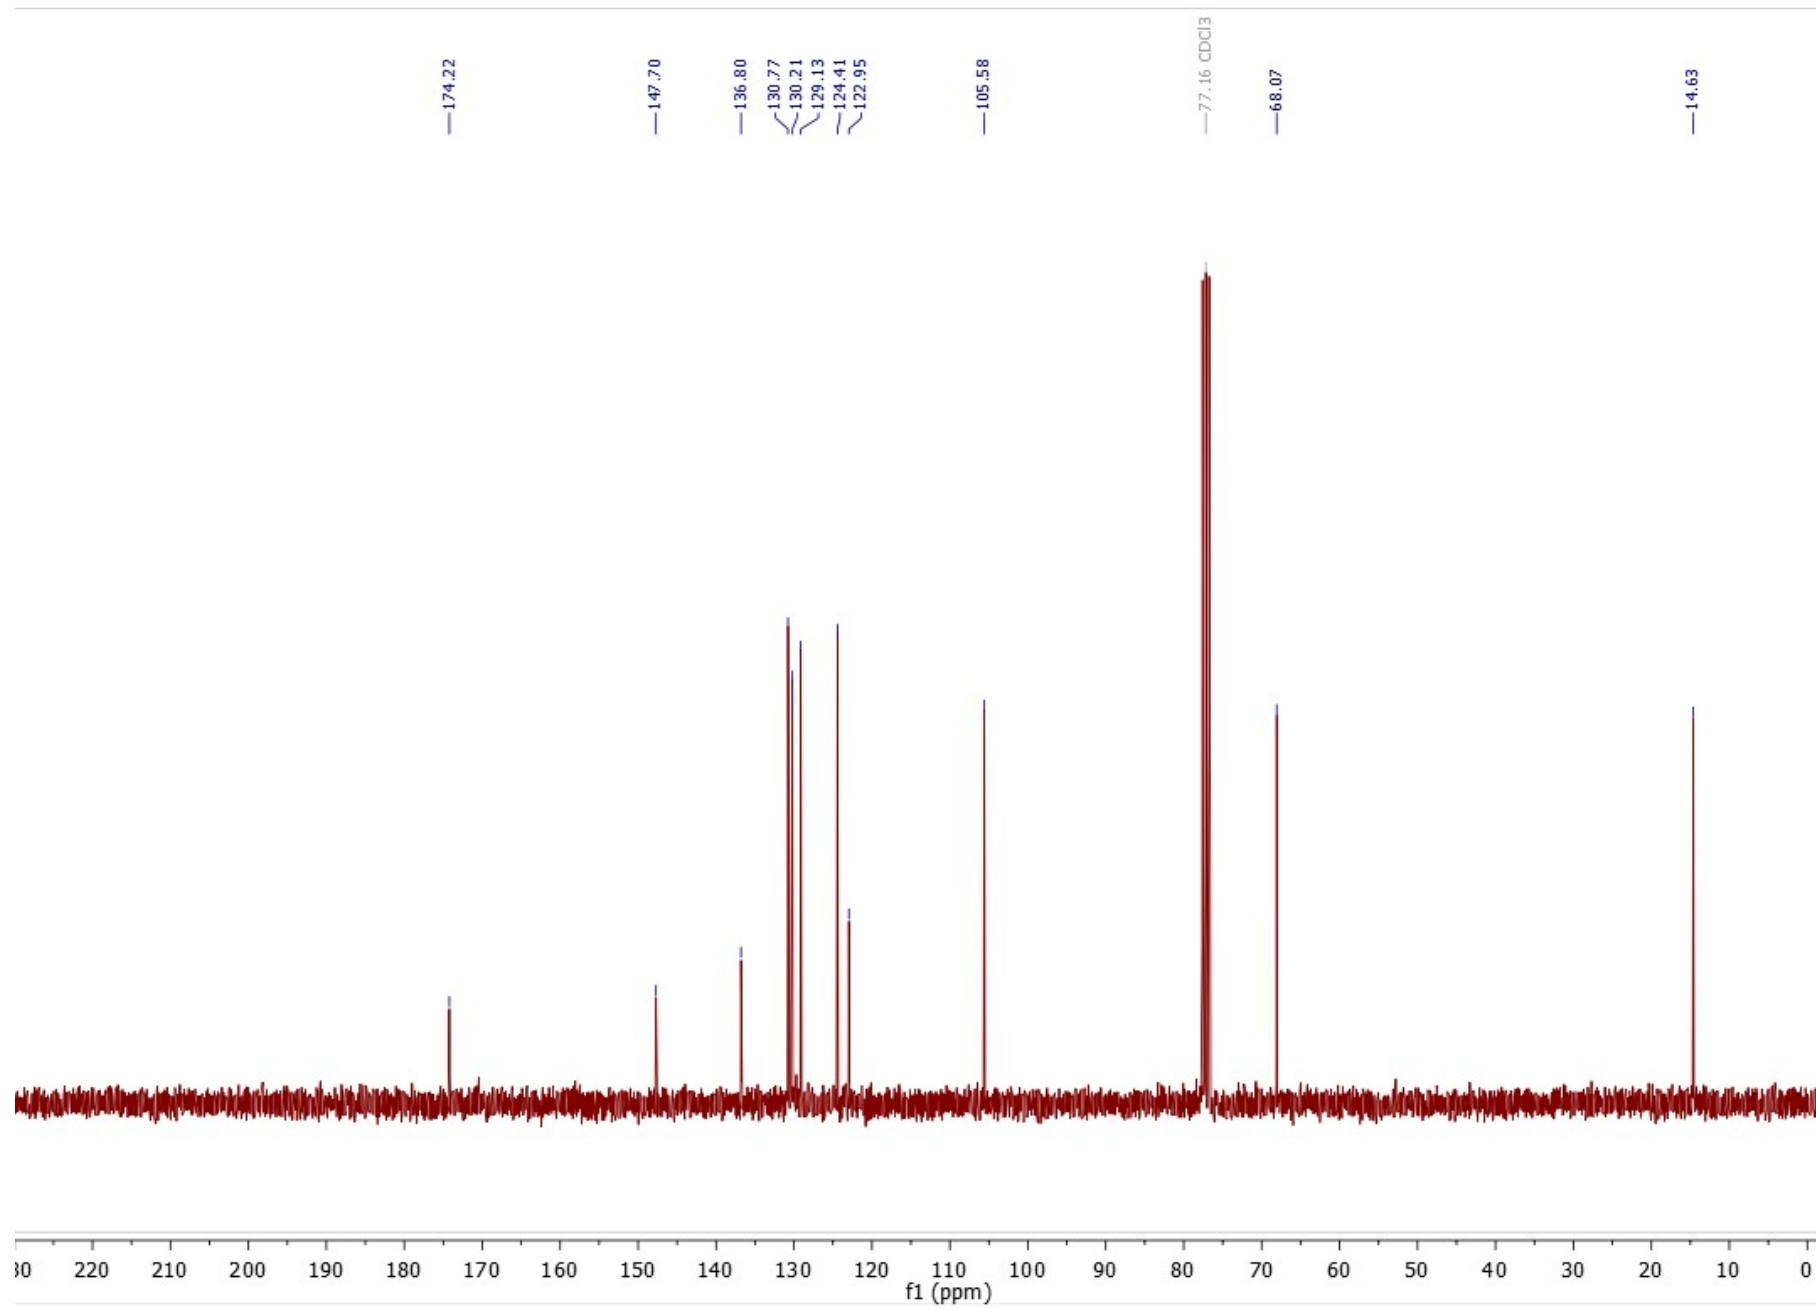

# 2-Ethoxy-4-(4-(azidomethyl)phenyl)thiazole (3ic)

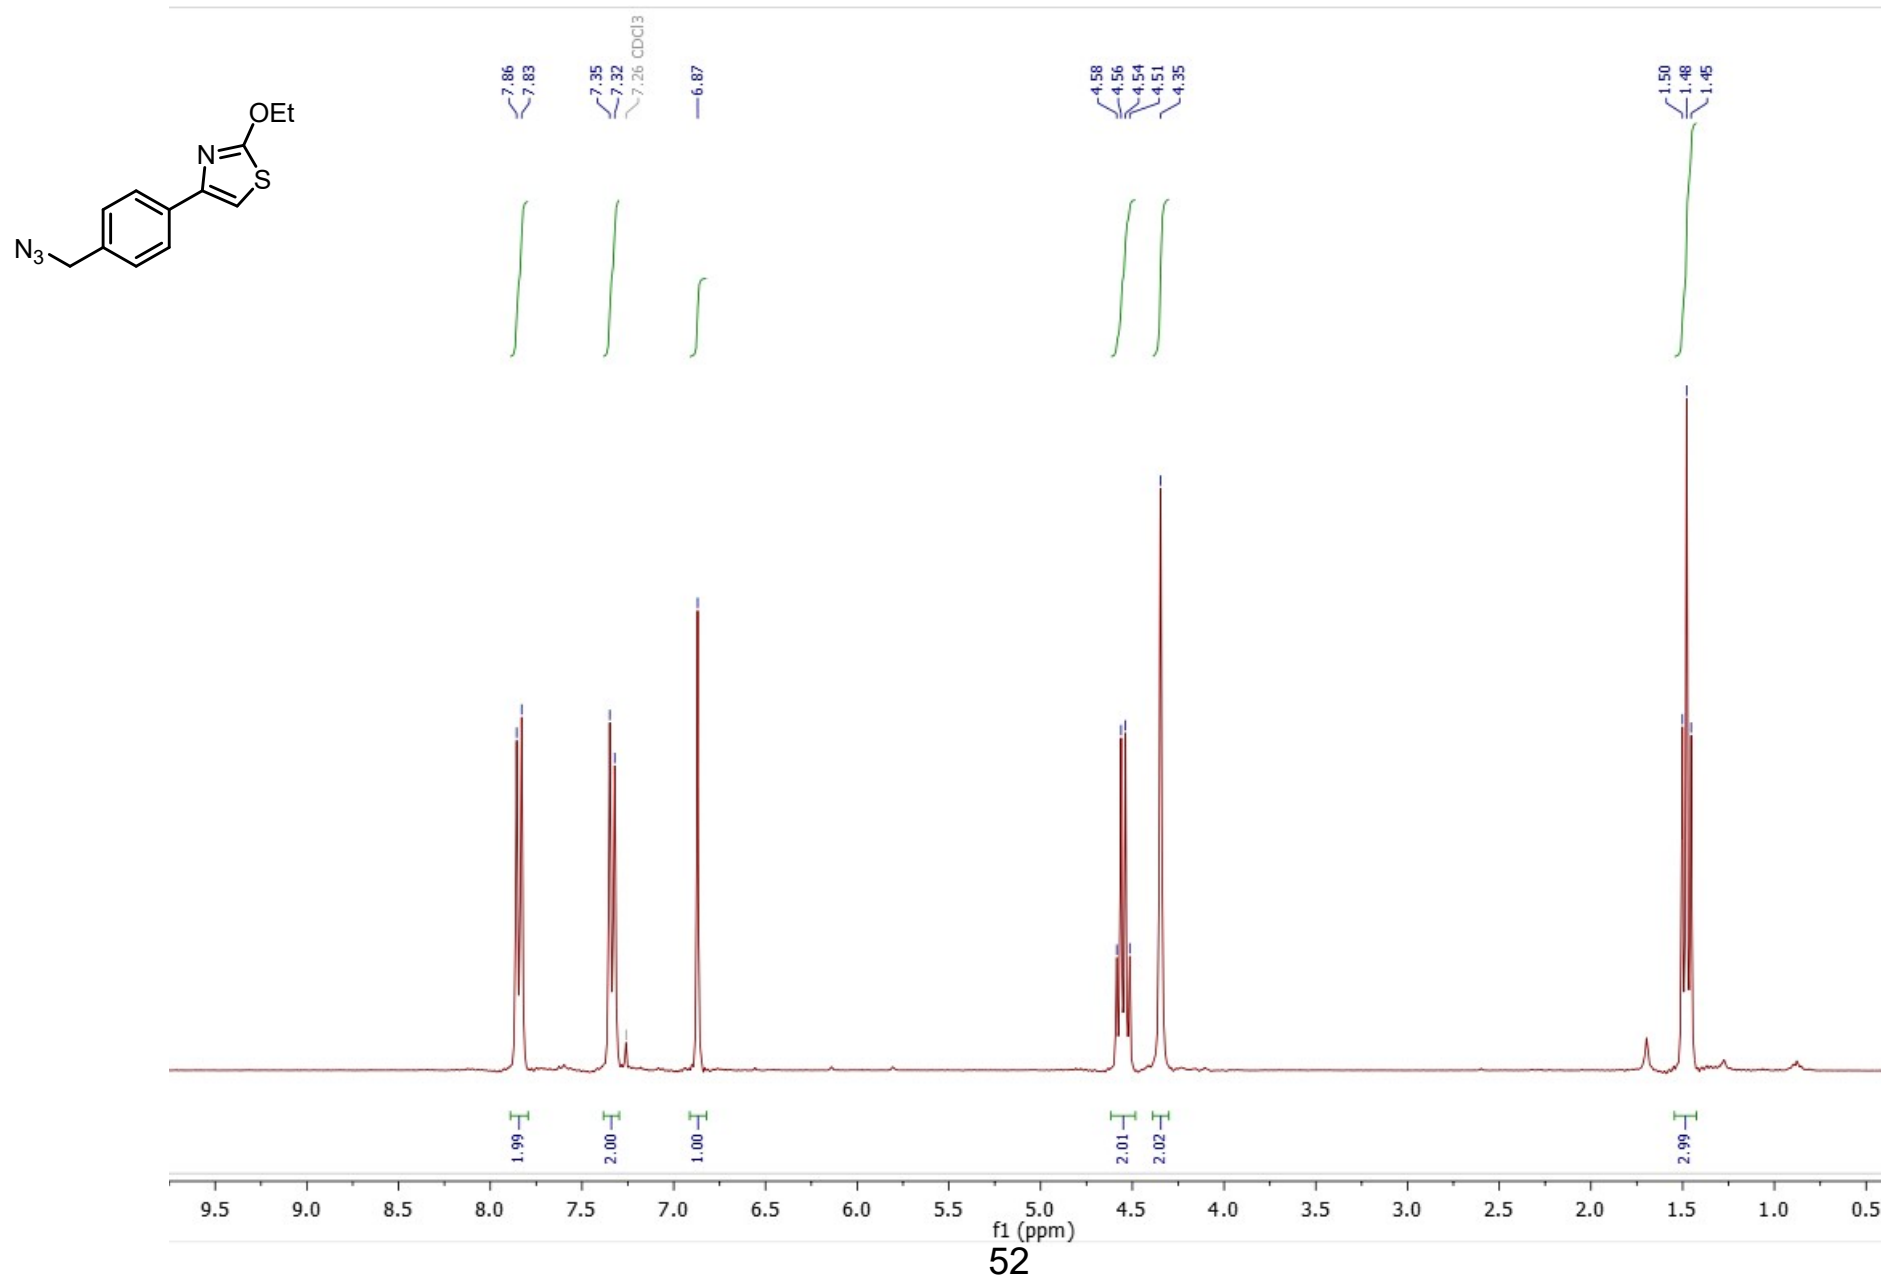

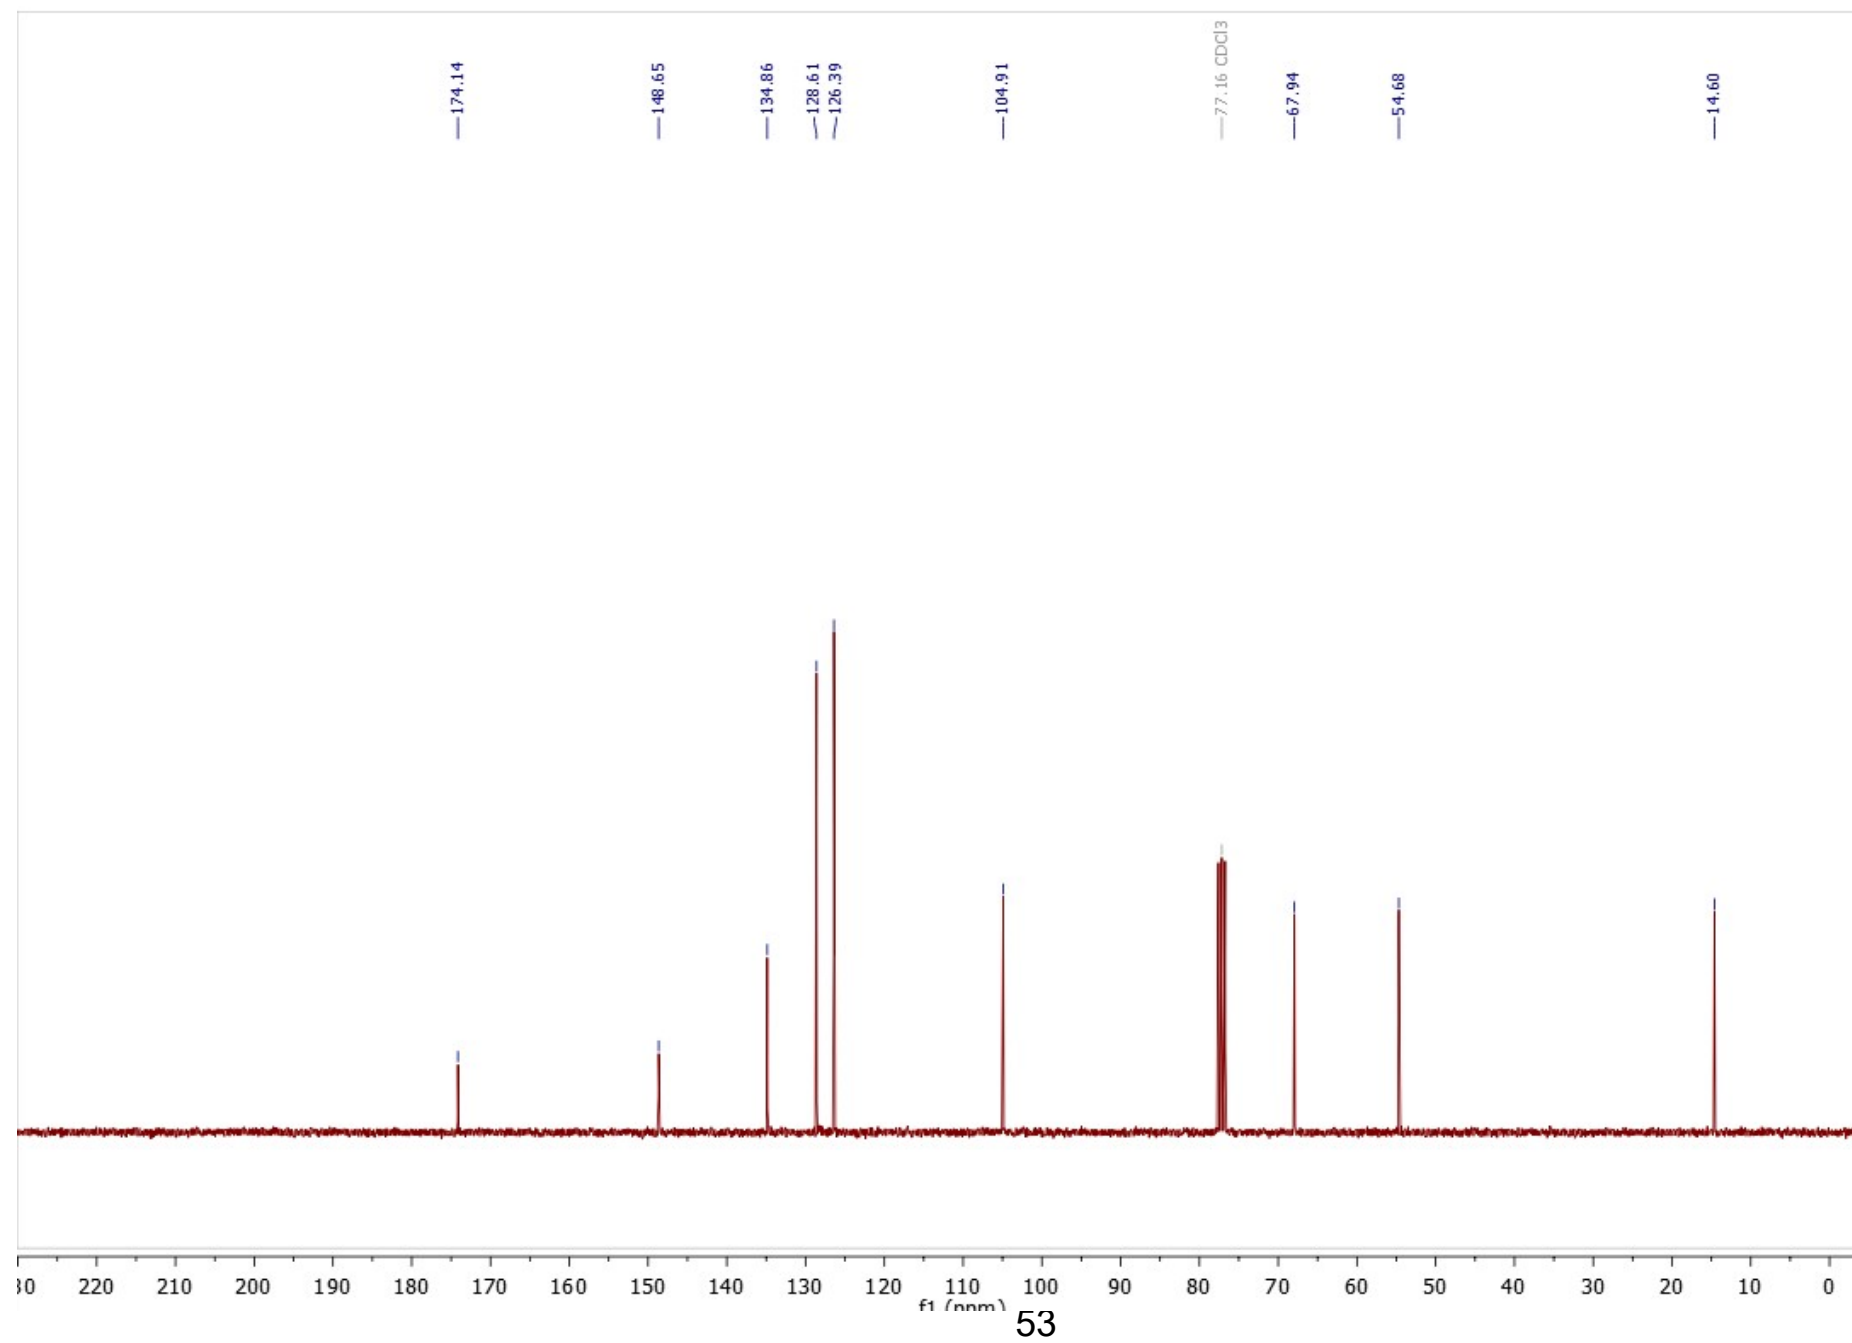

# 2-Ethoxy-4-(naphthalen-2-yl)thiazole (3jc)

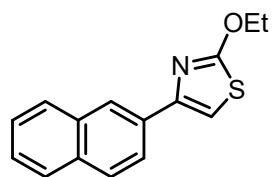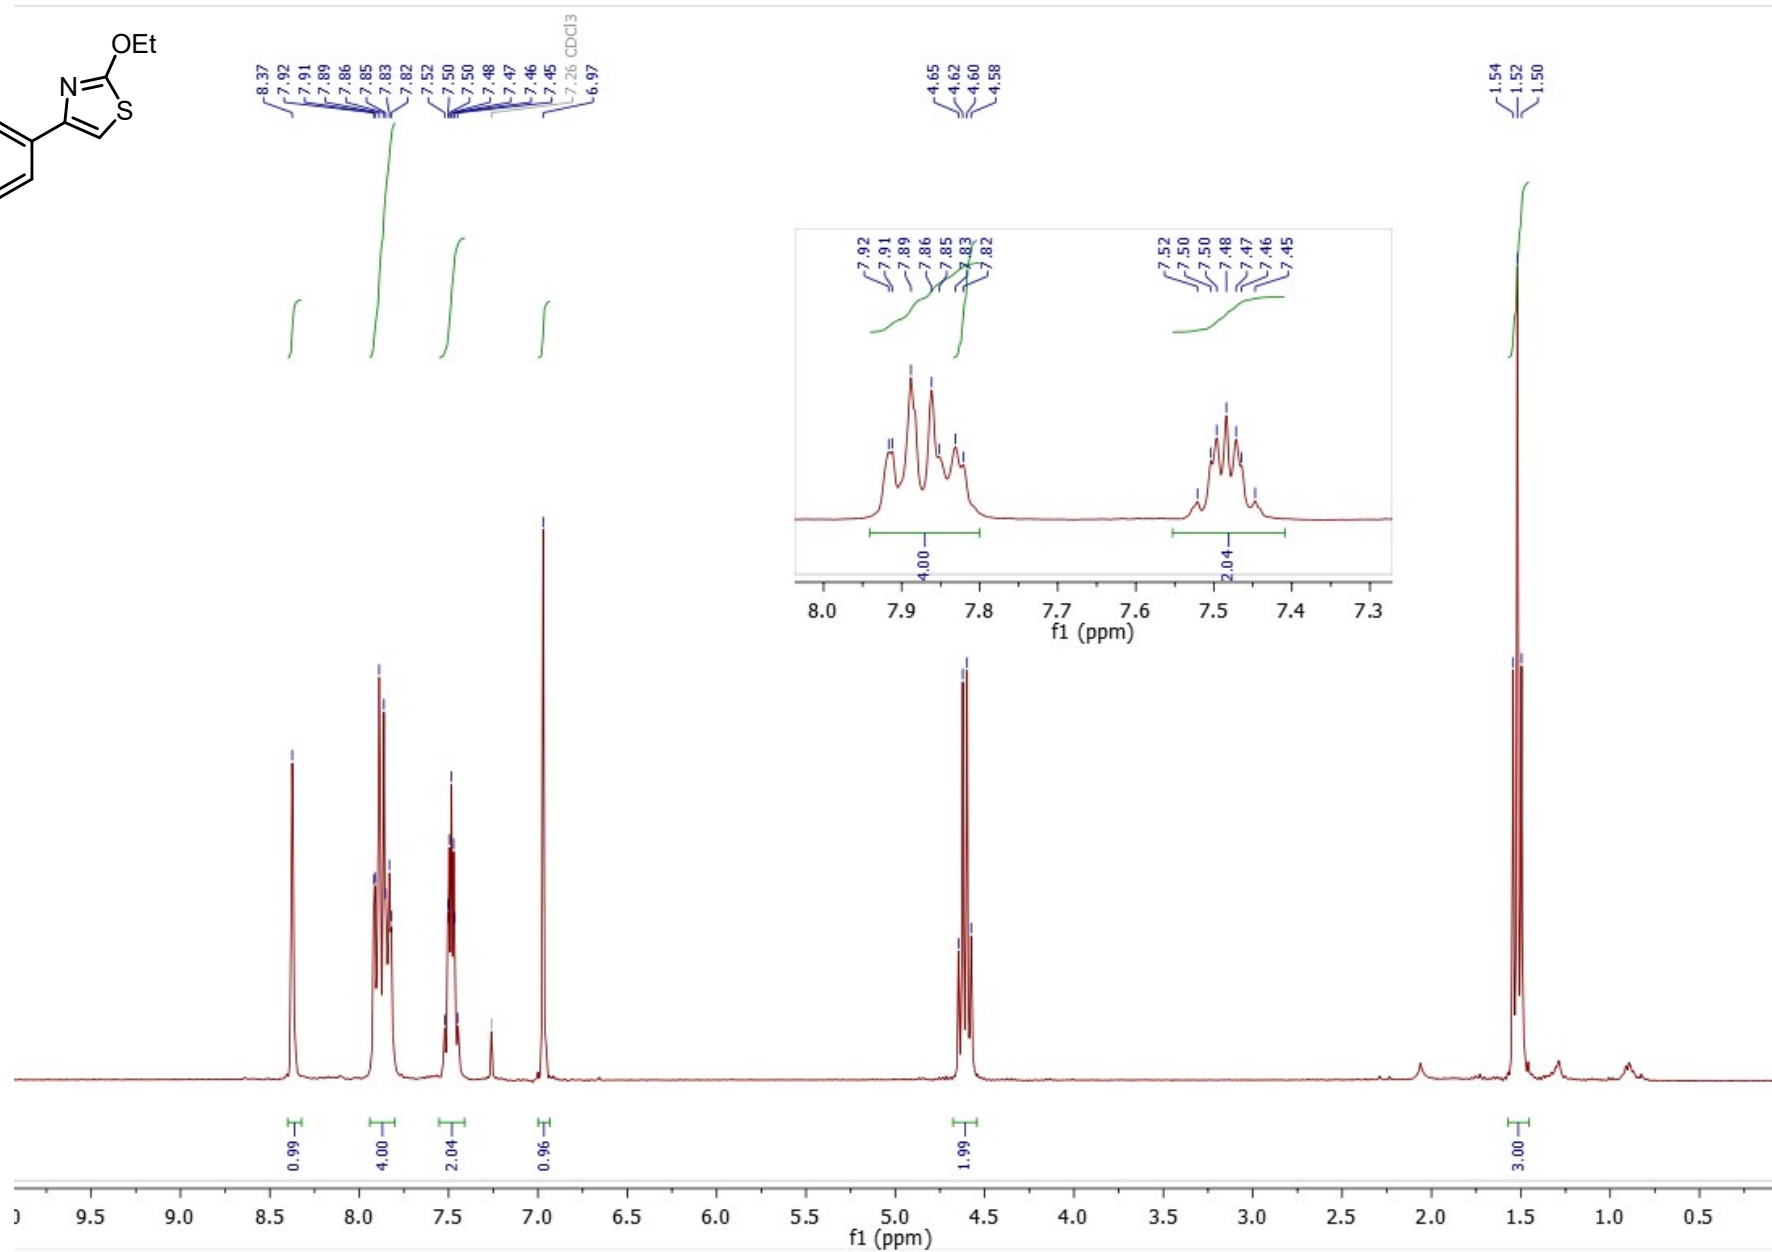

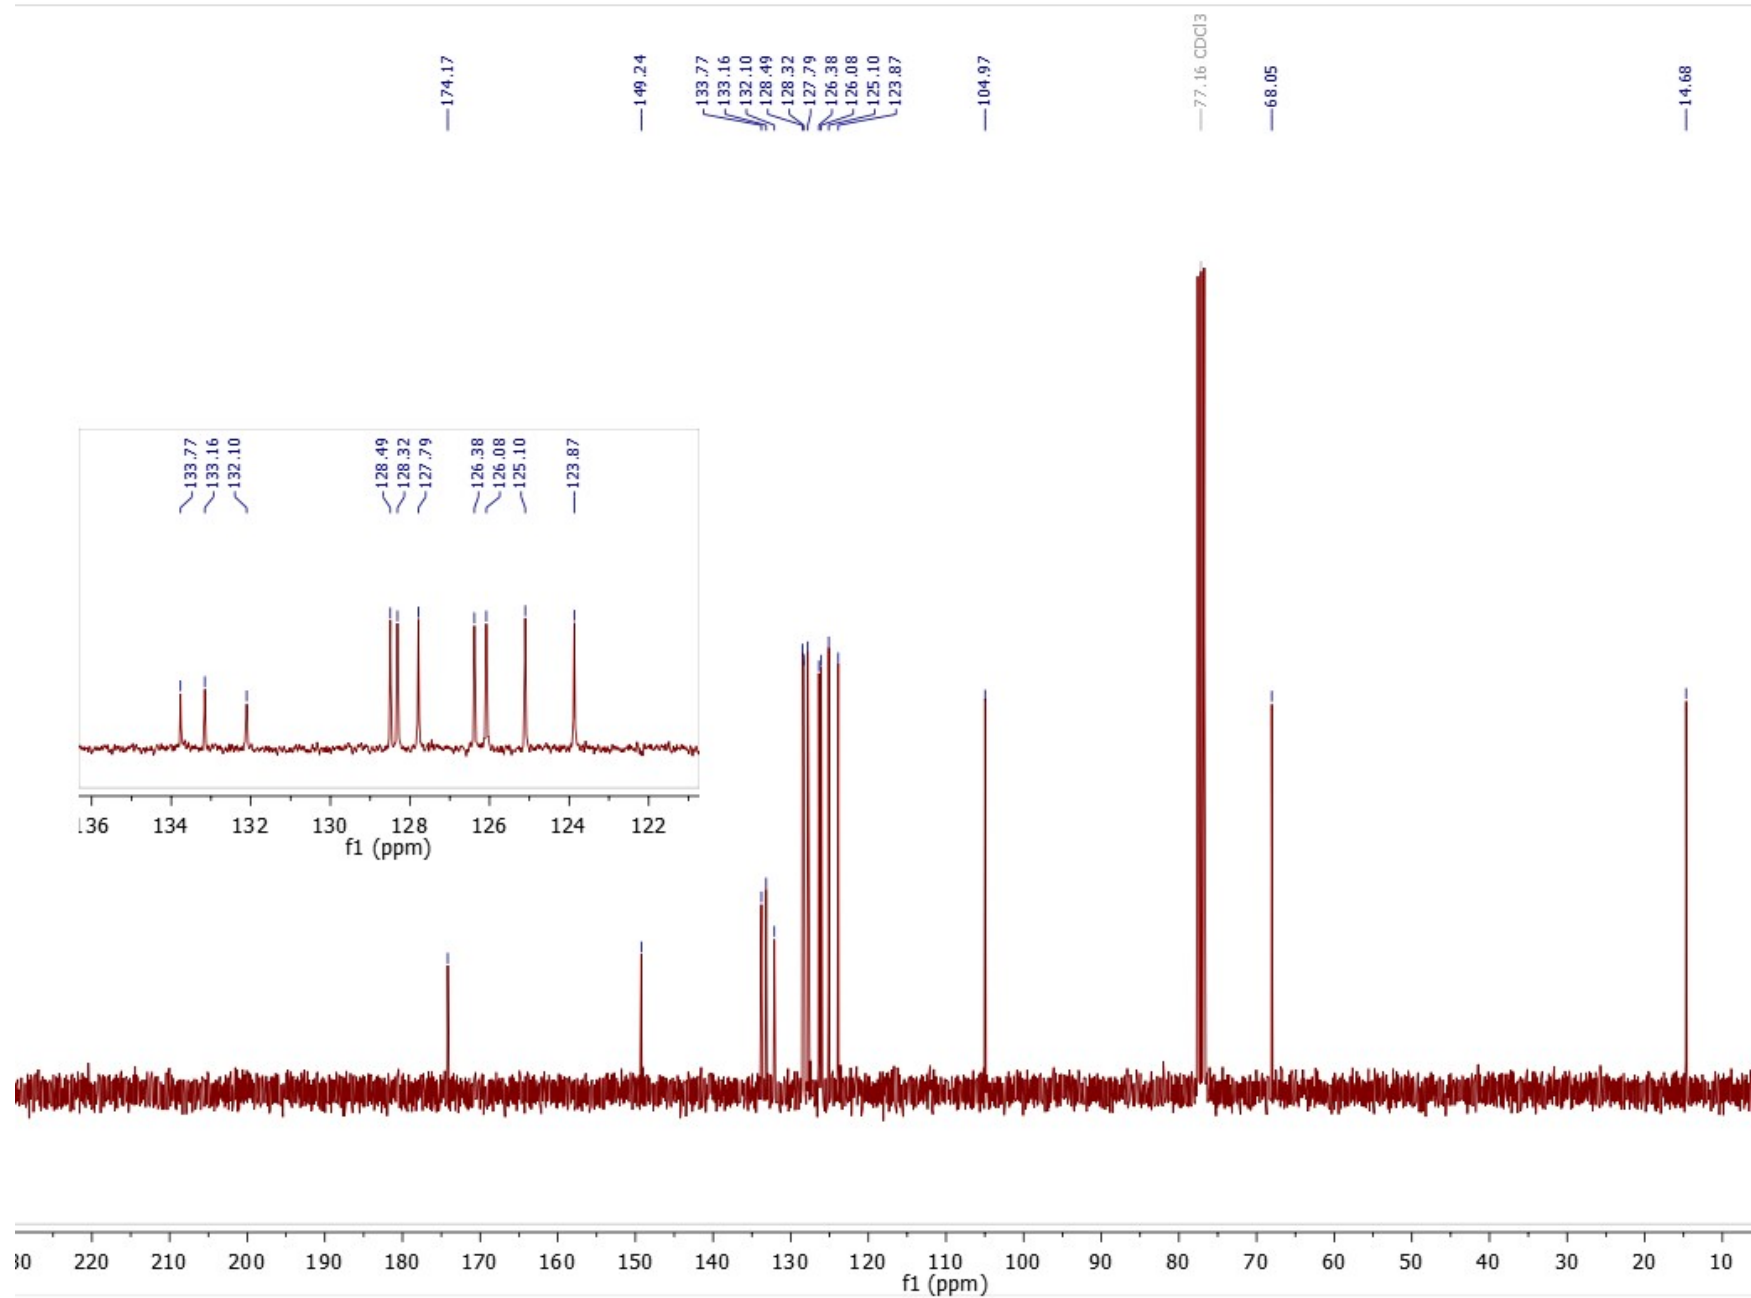

## 2-Ethoxy-5-methyl-4-phenylthiazole (3kc)

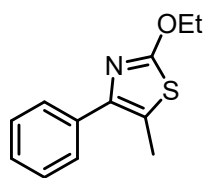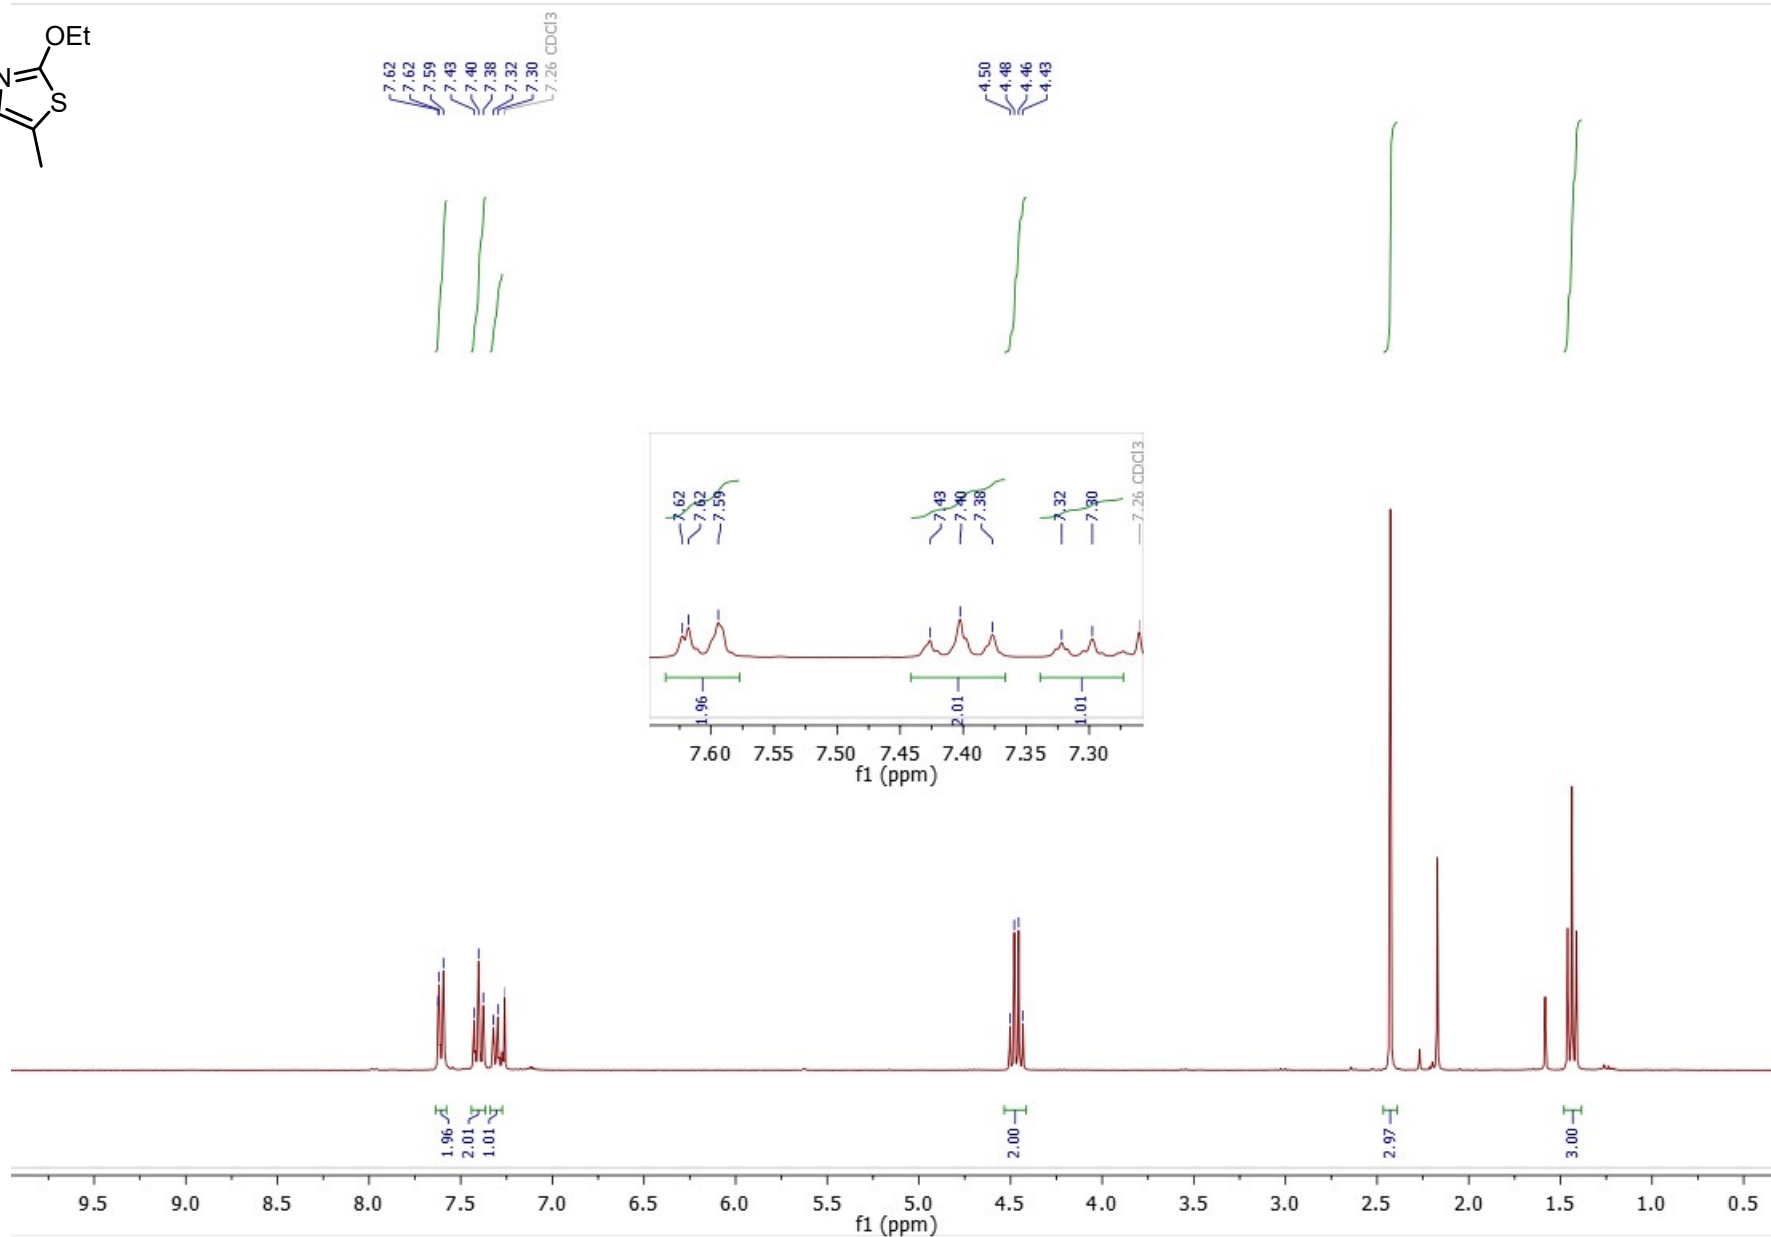

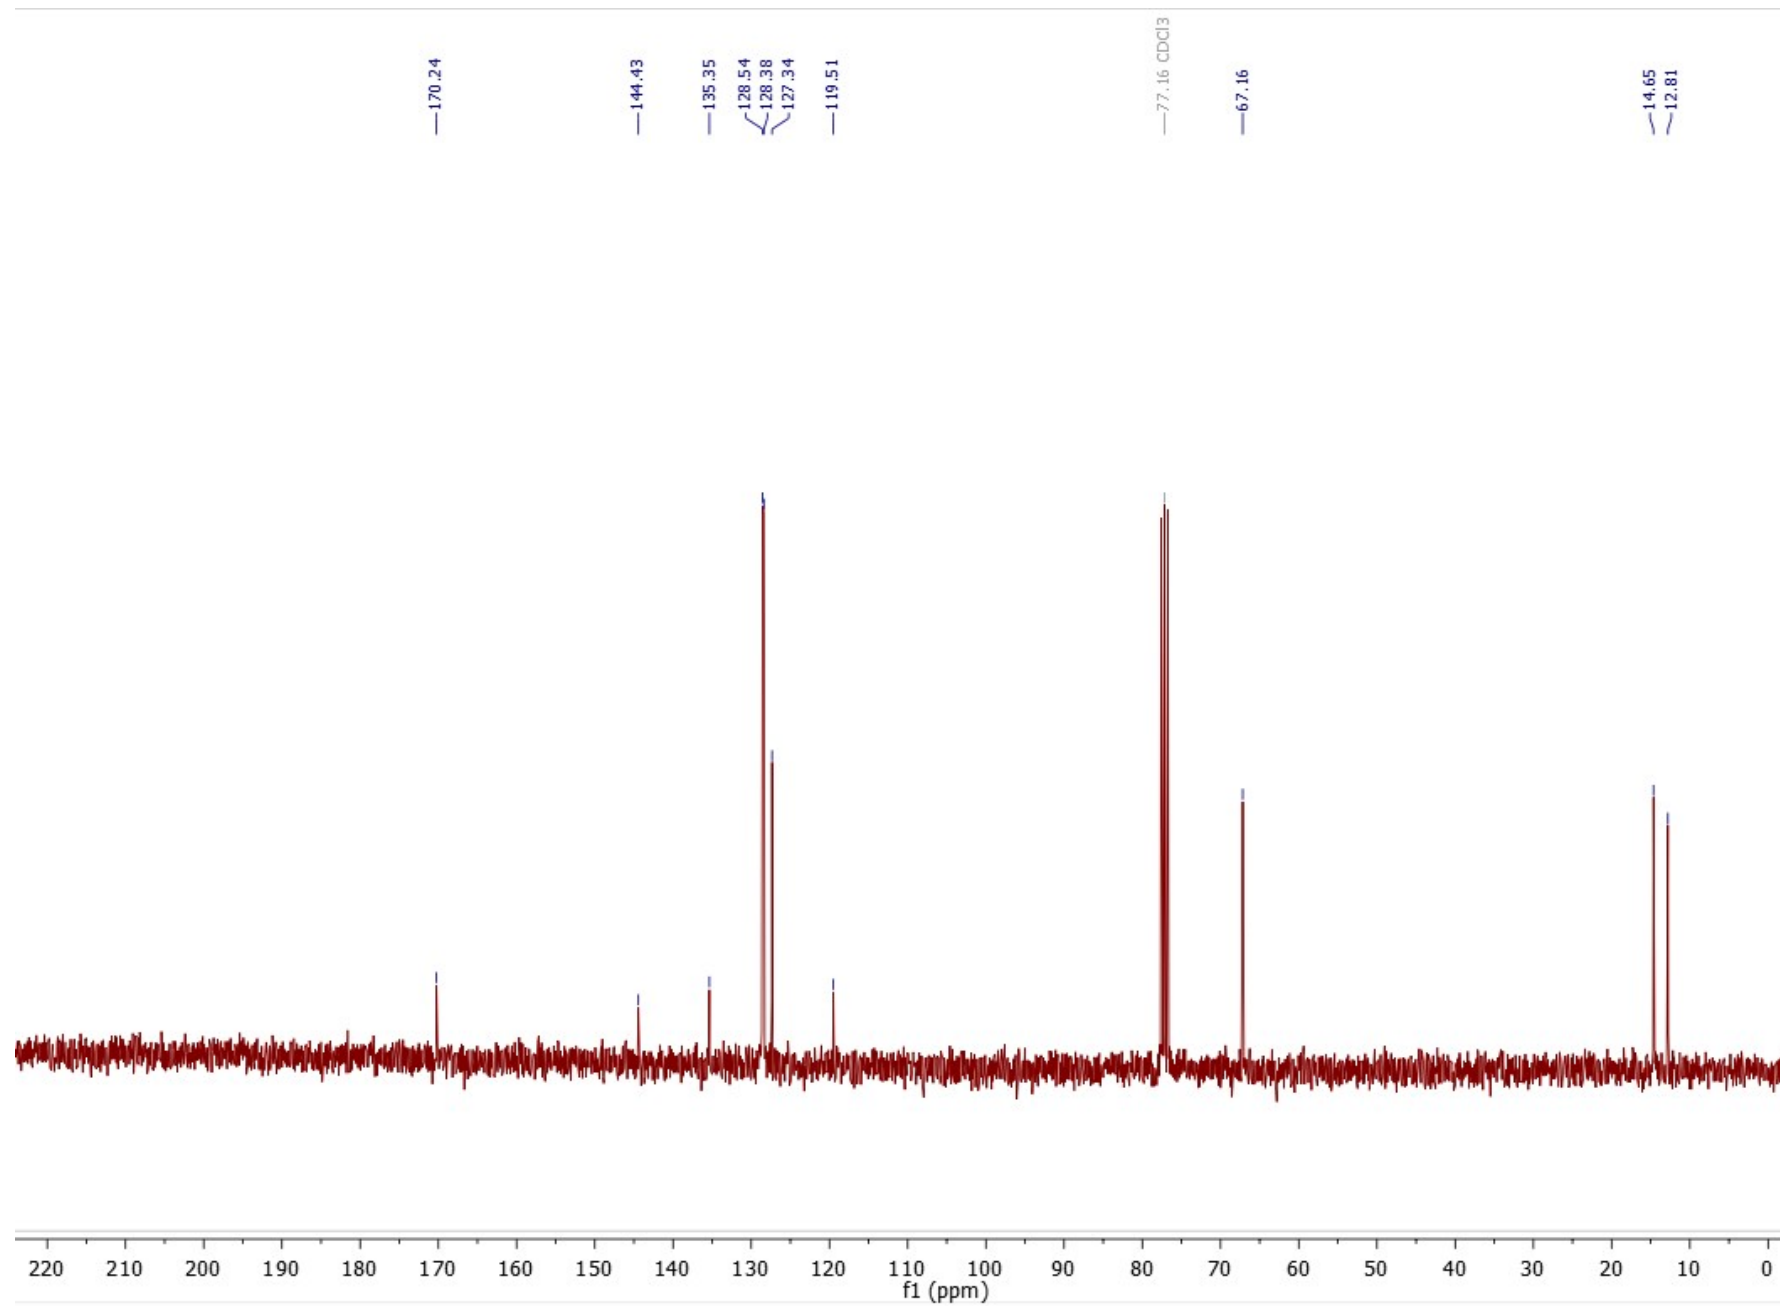

57

# 2-Ethoxy-4-octylthiazole (3lc)

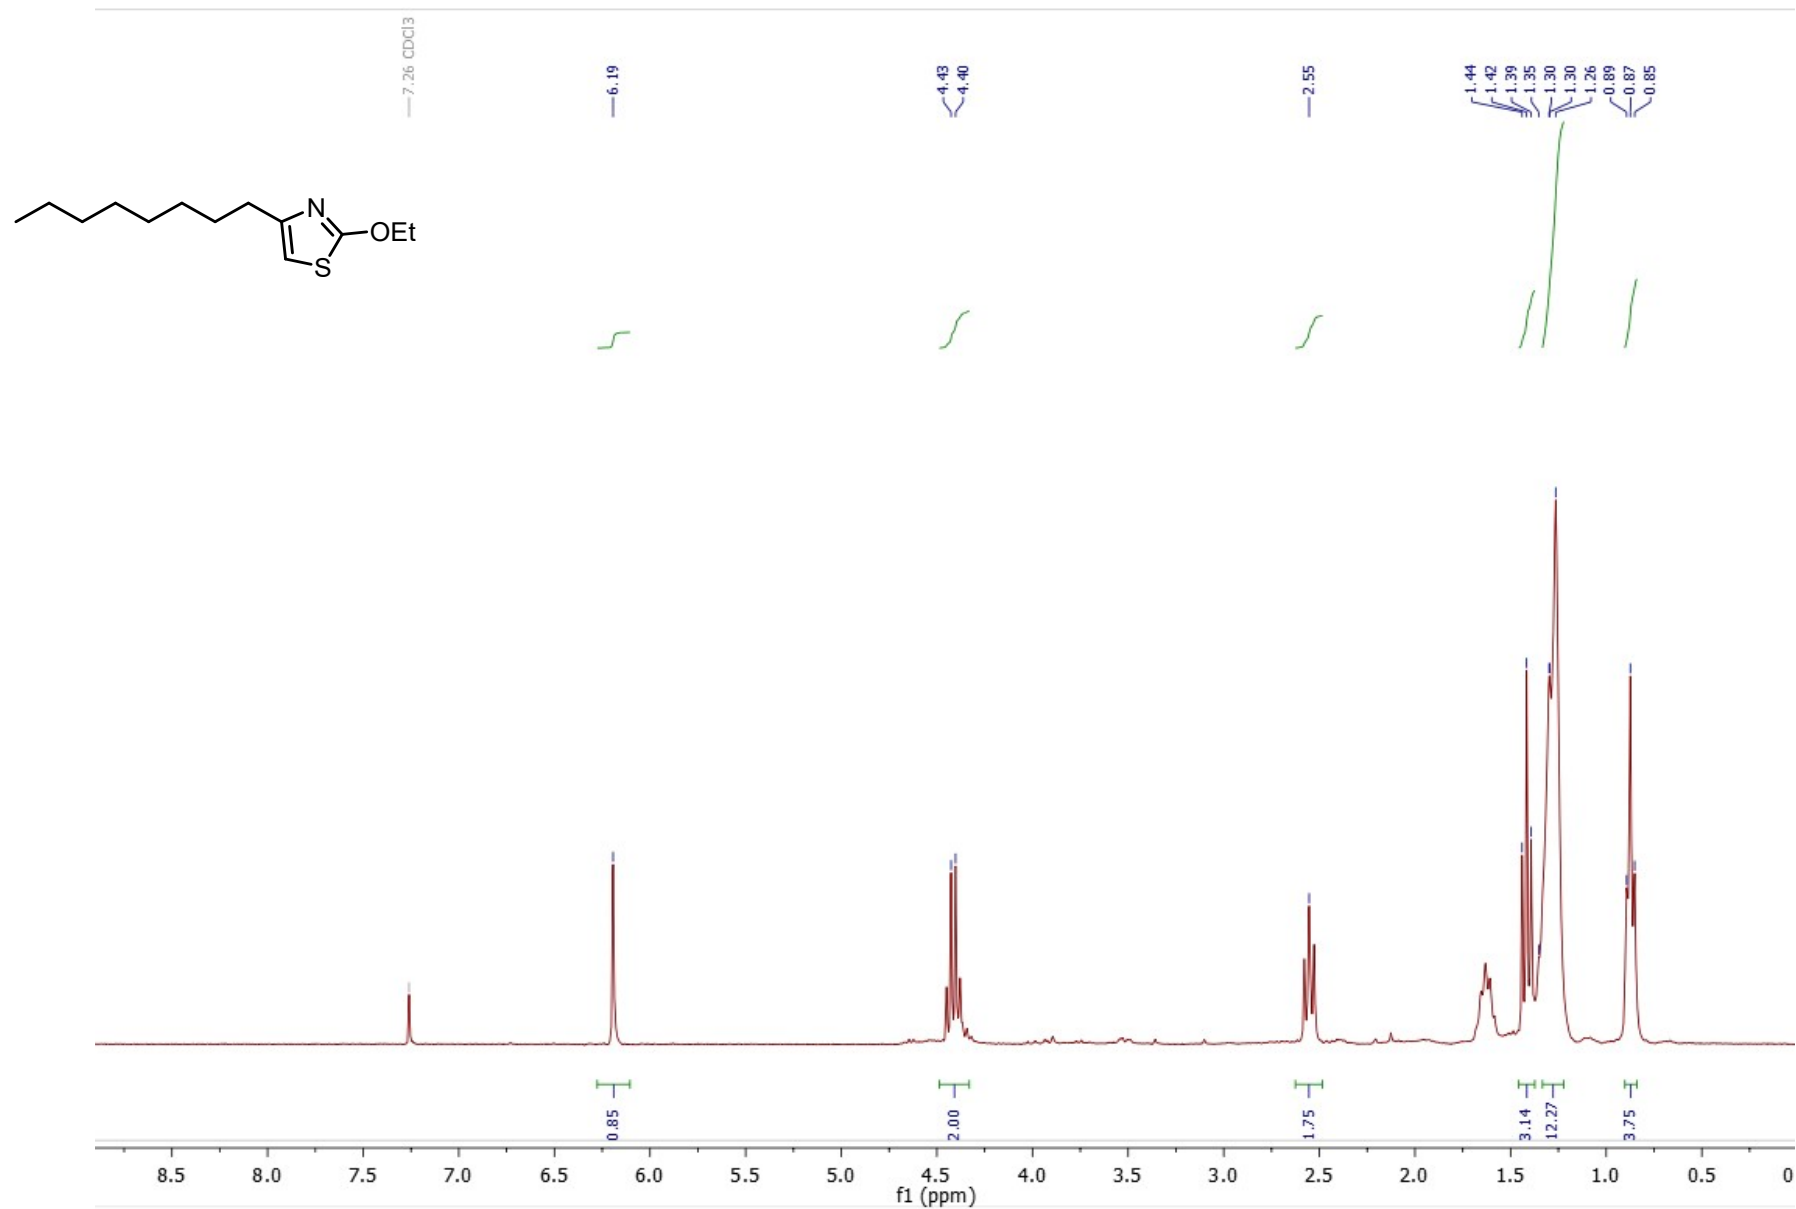

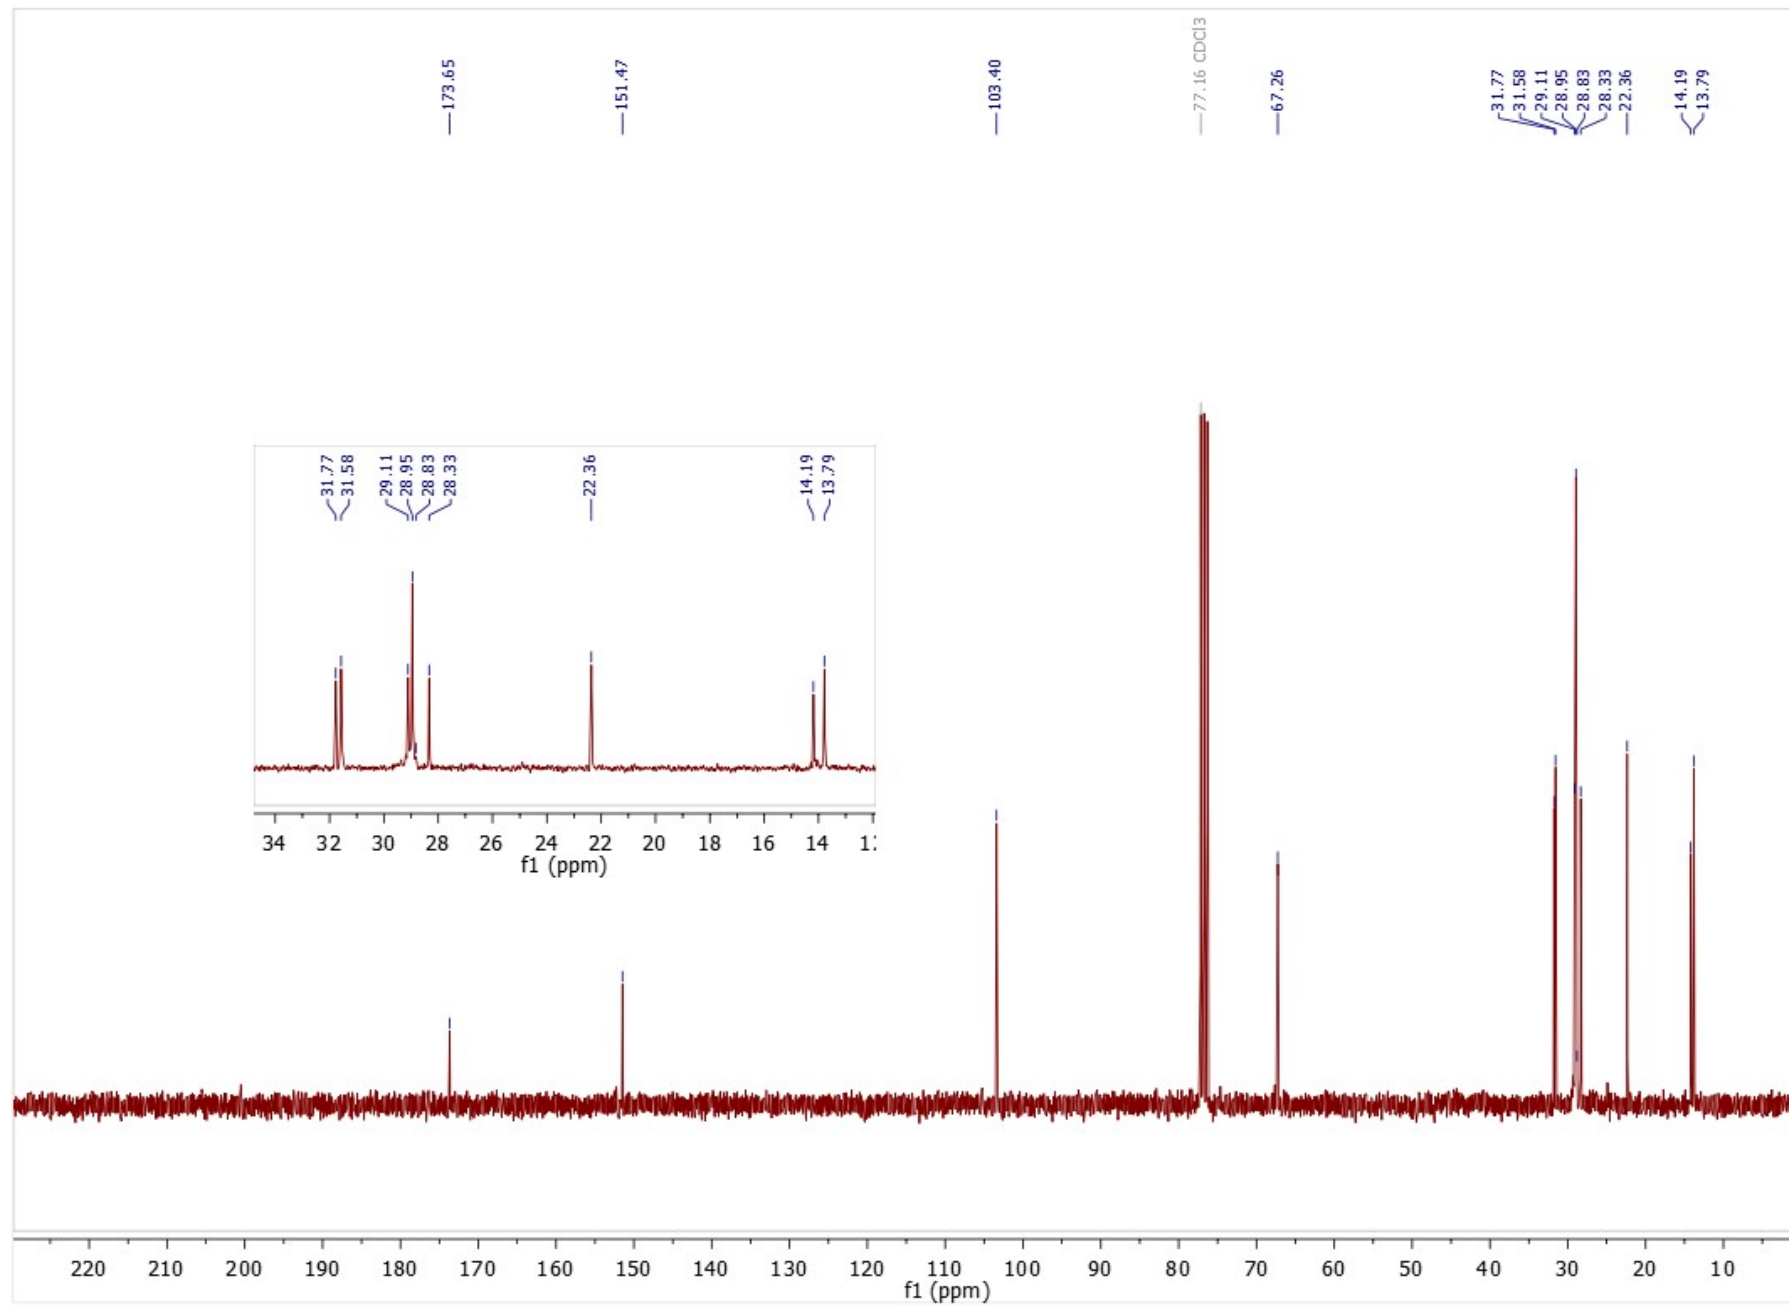

# 2-Ethoxy-4-decylthiazole (3mc)

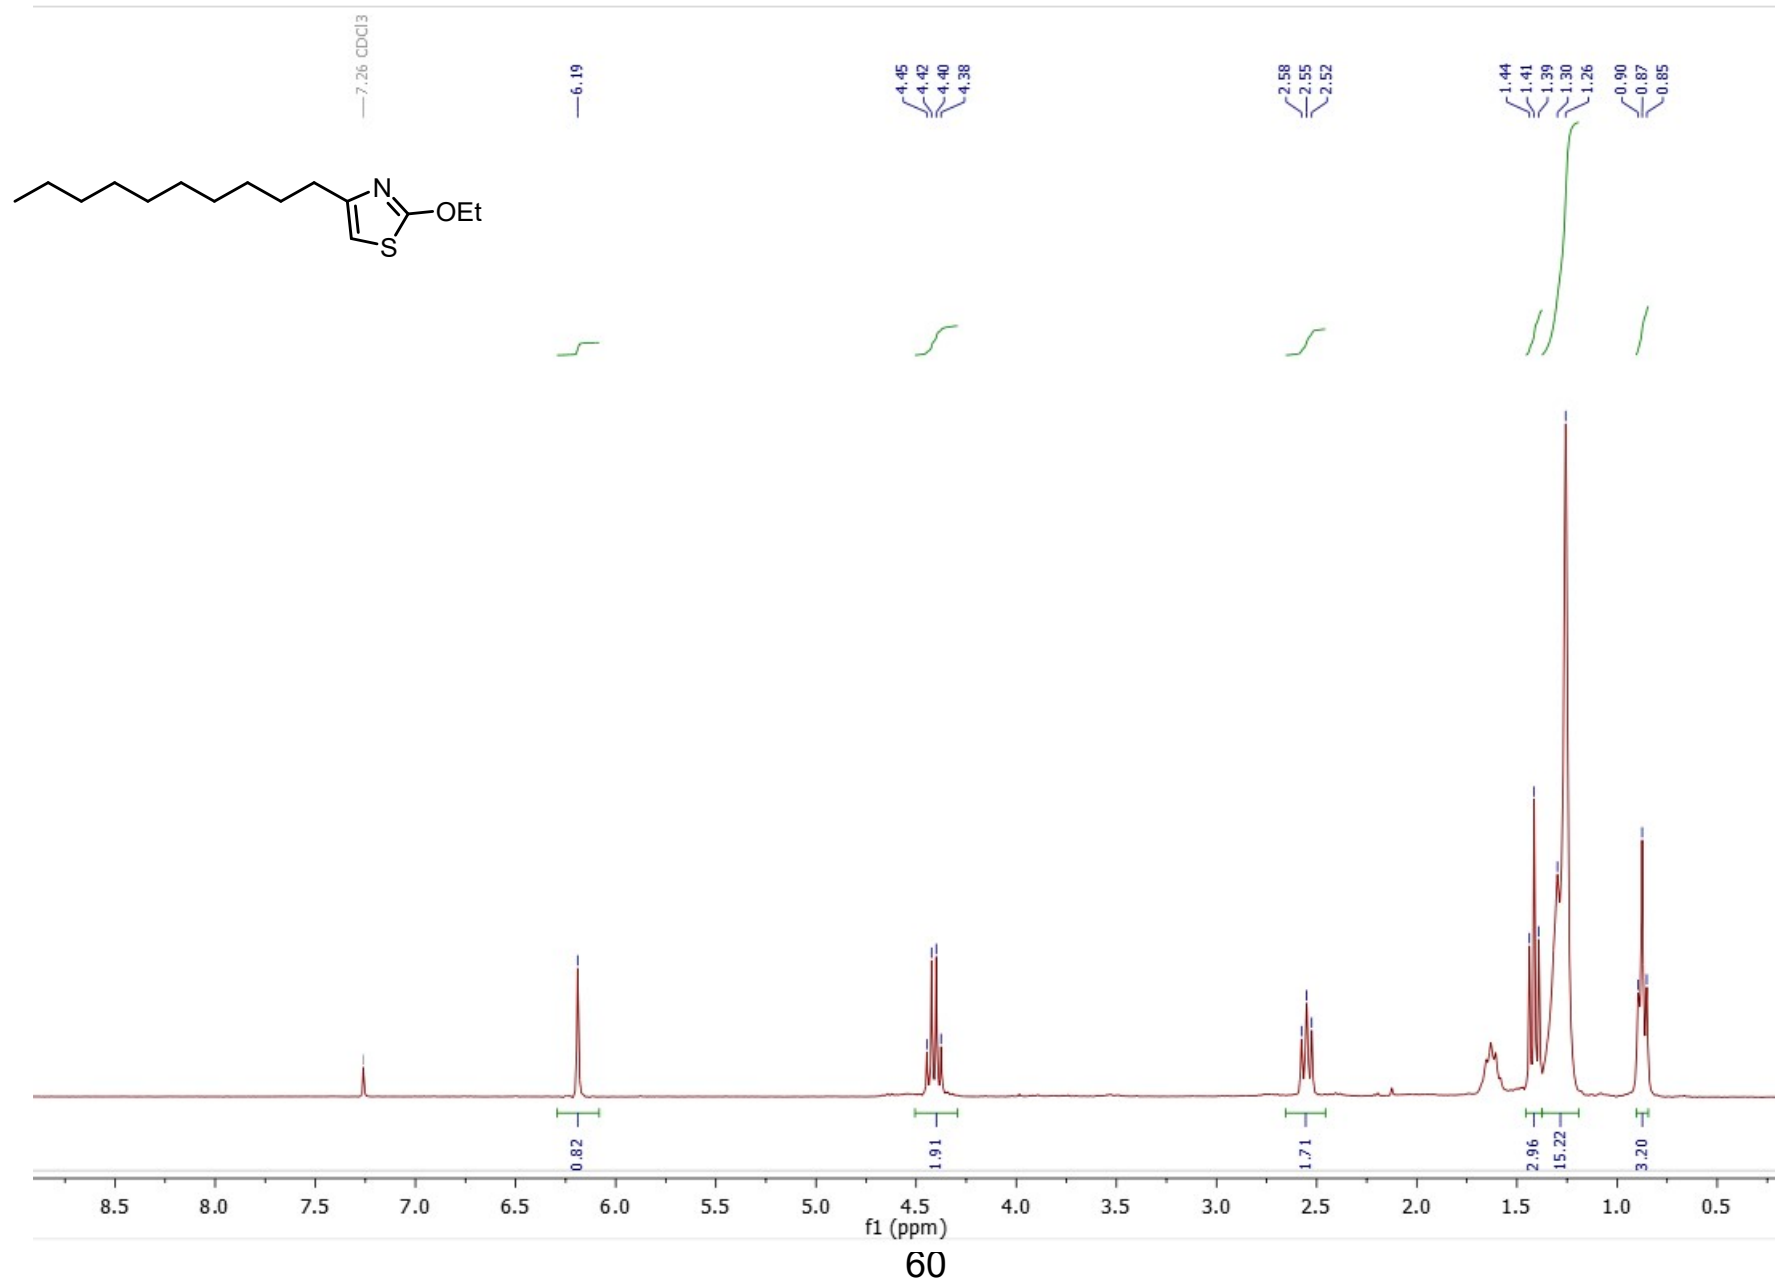

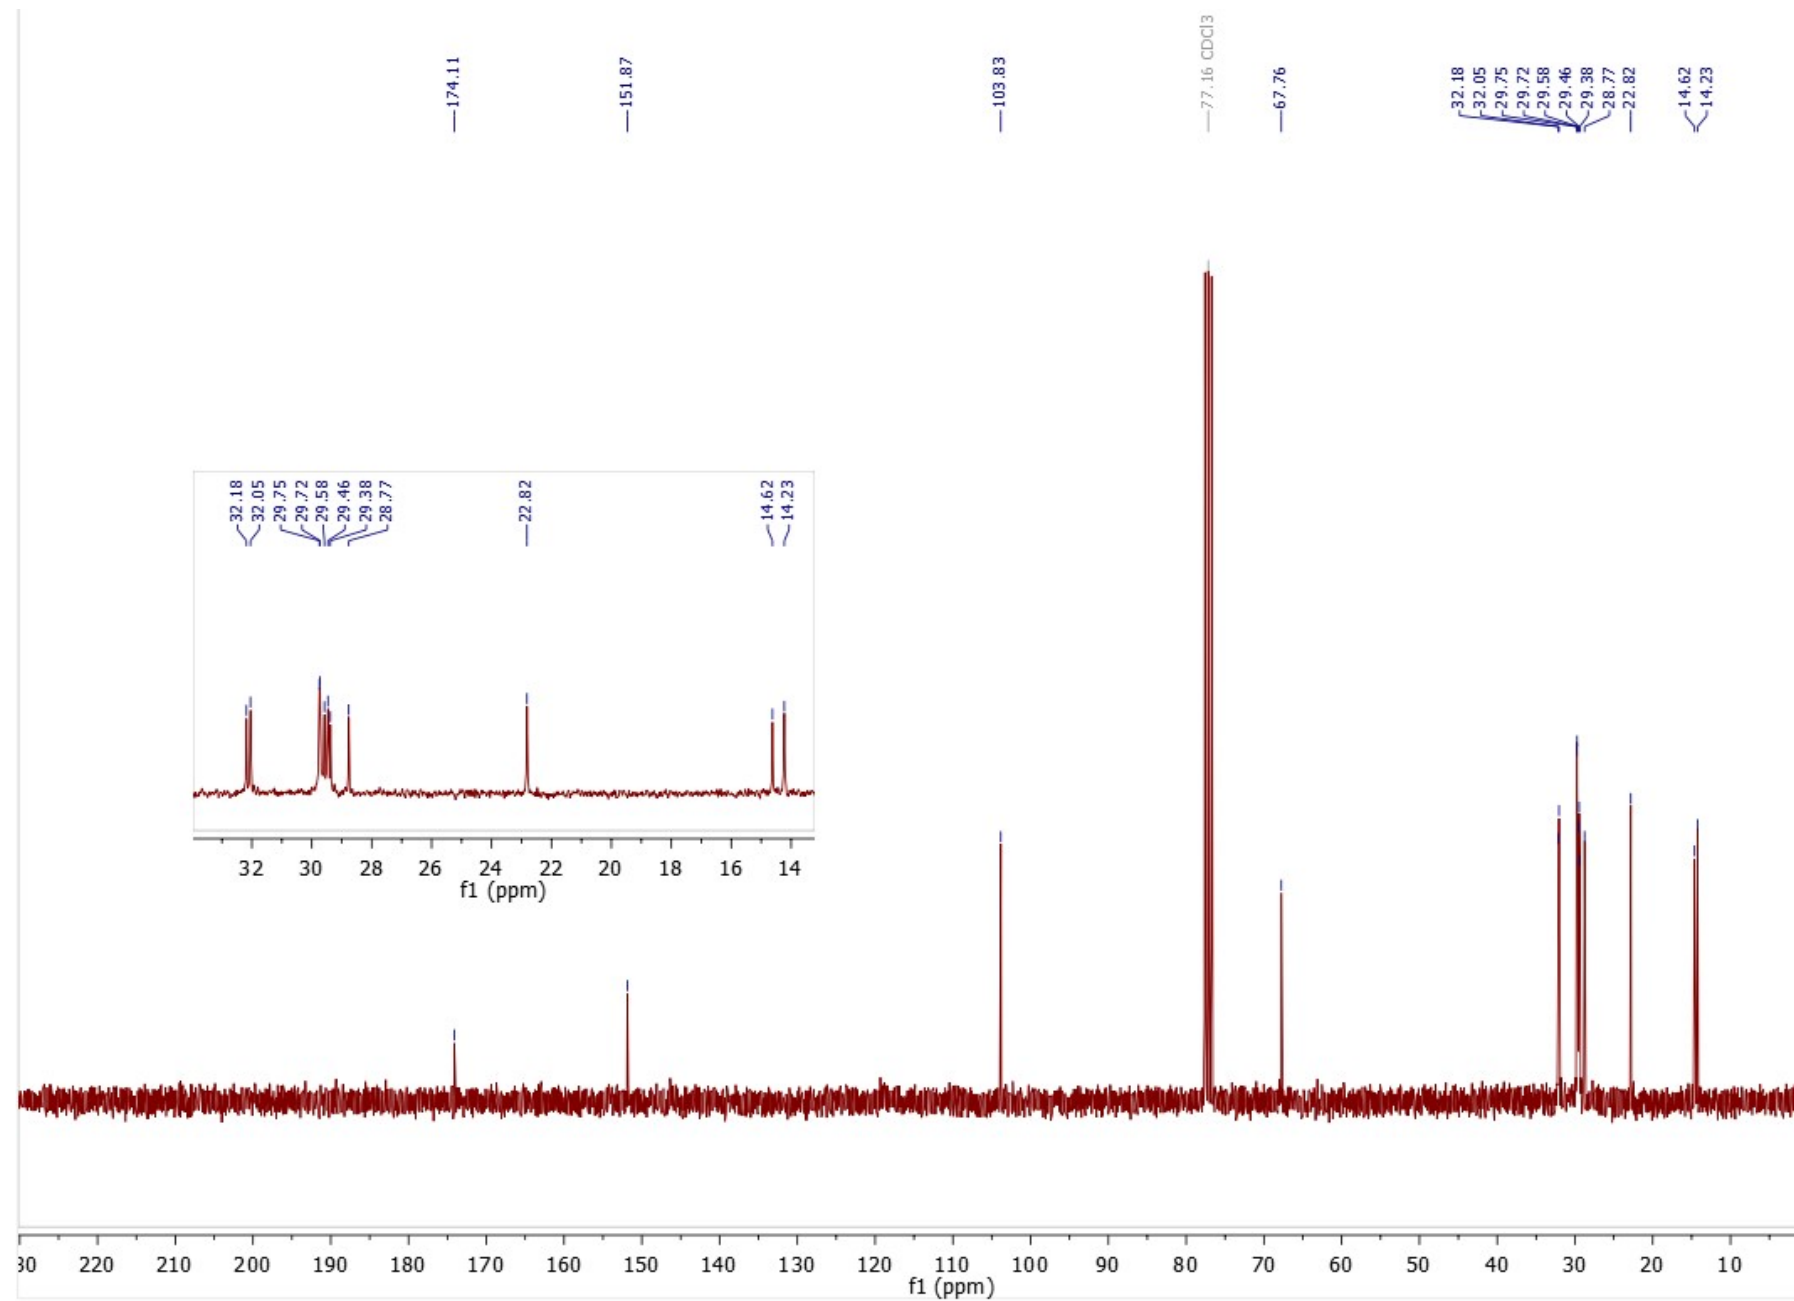

# 2-Ethoxy-4,5,6,7,8,9-hexahydrocycloocta[d]thiazole (3nc)

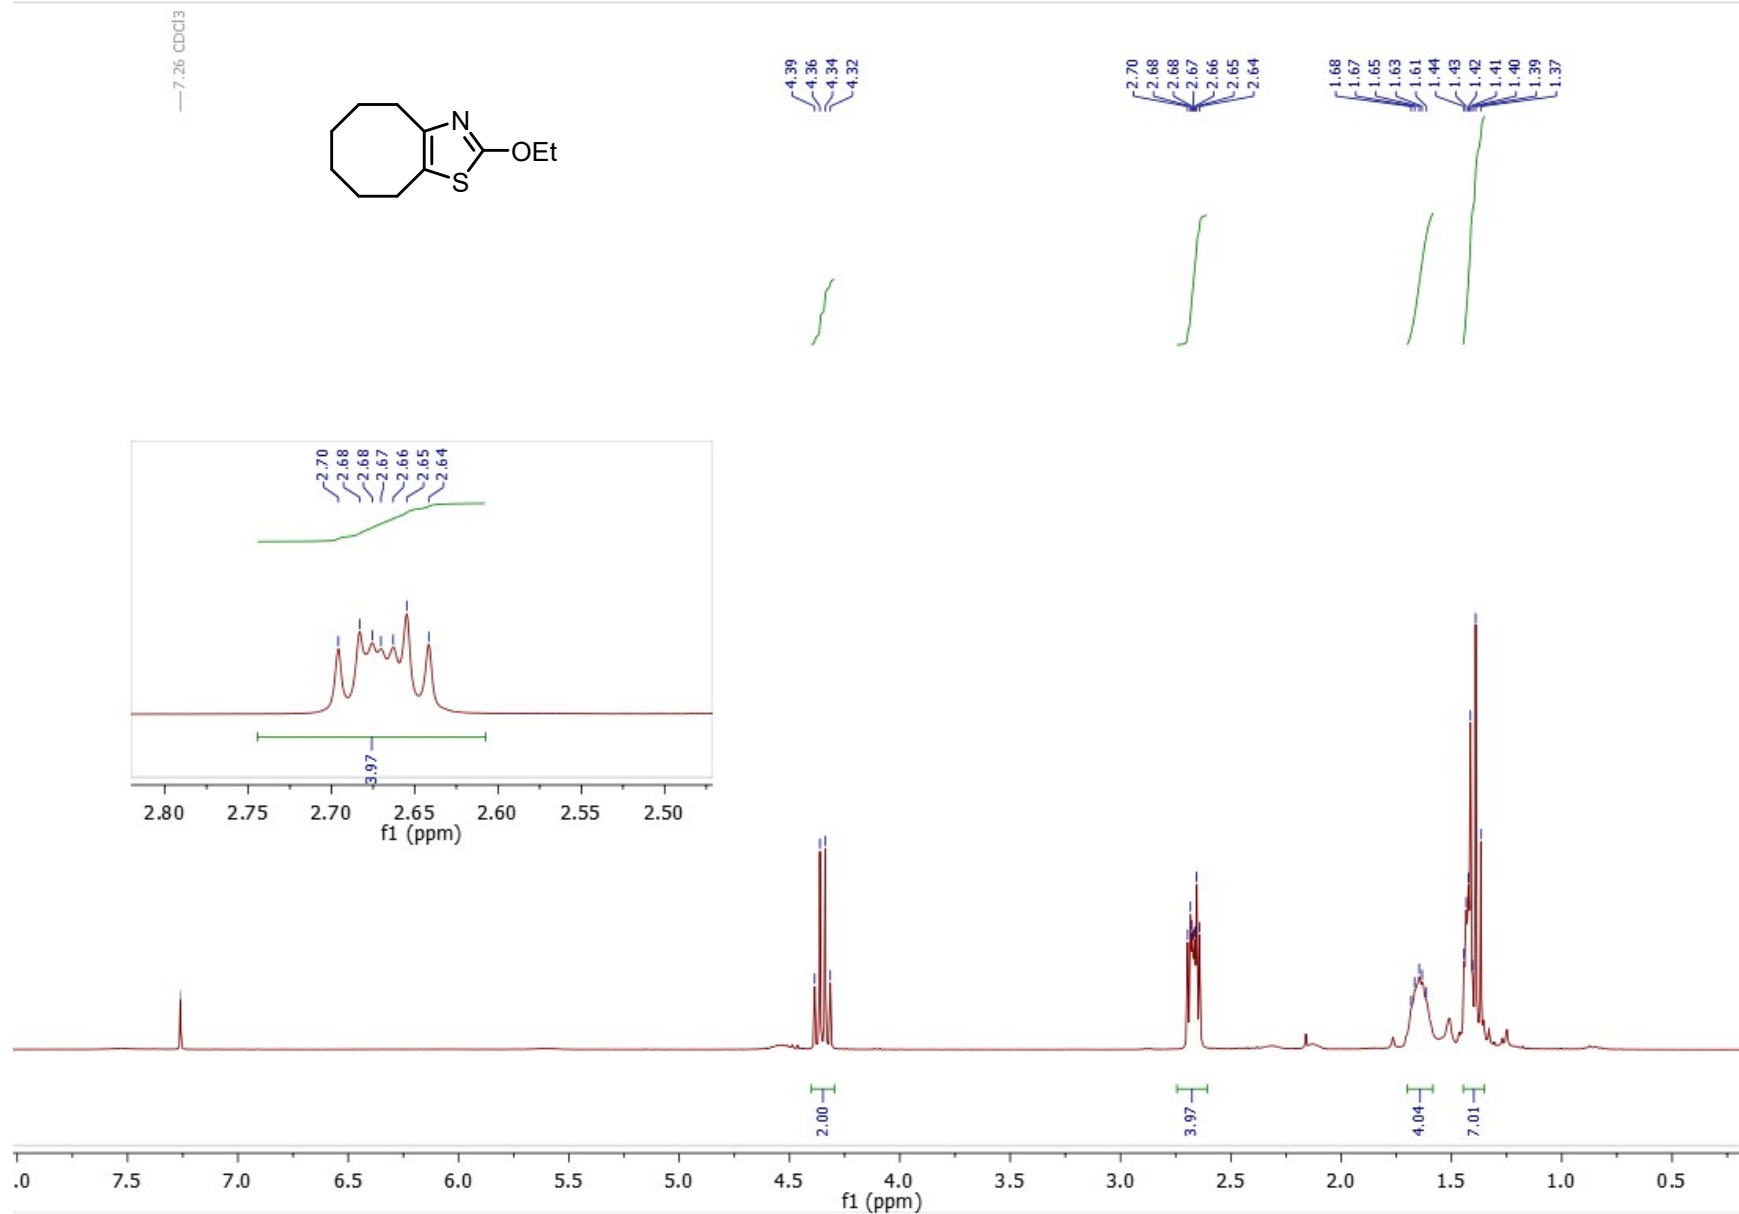

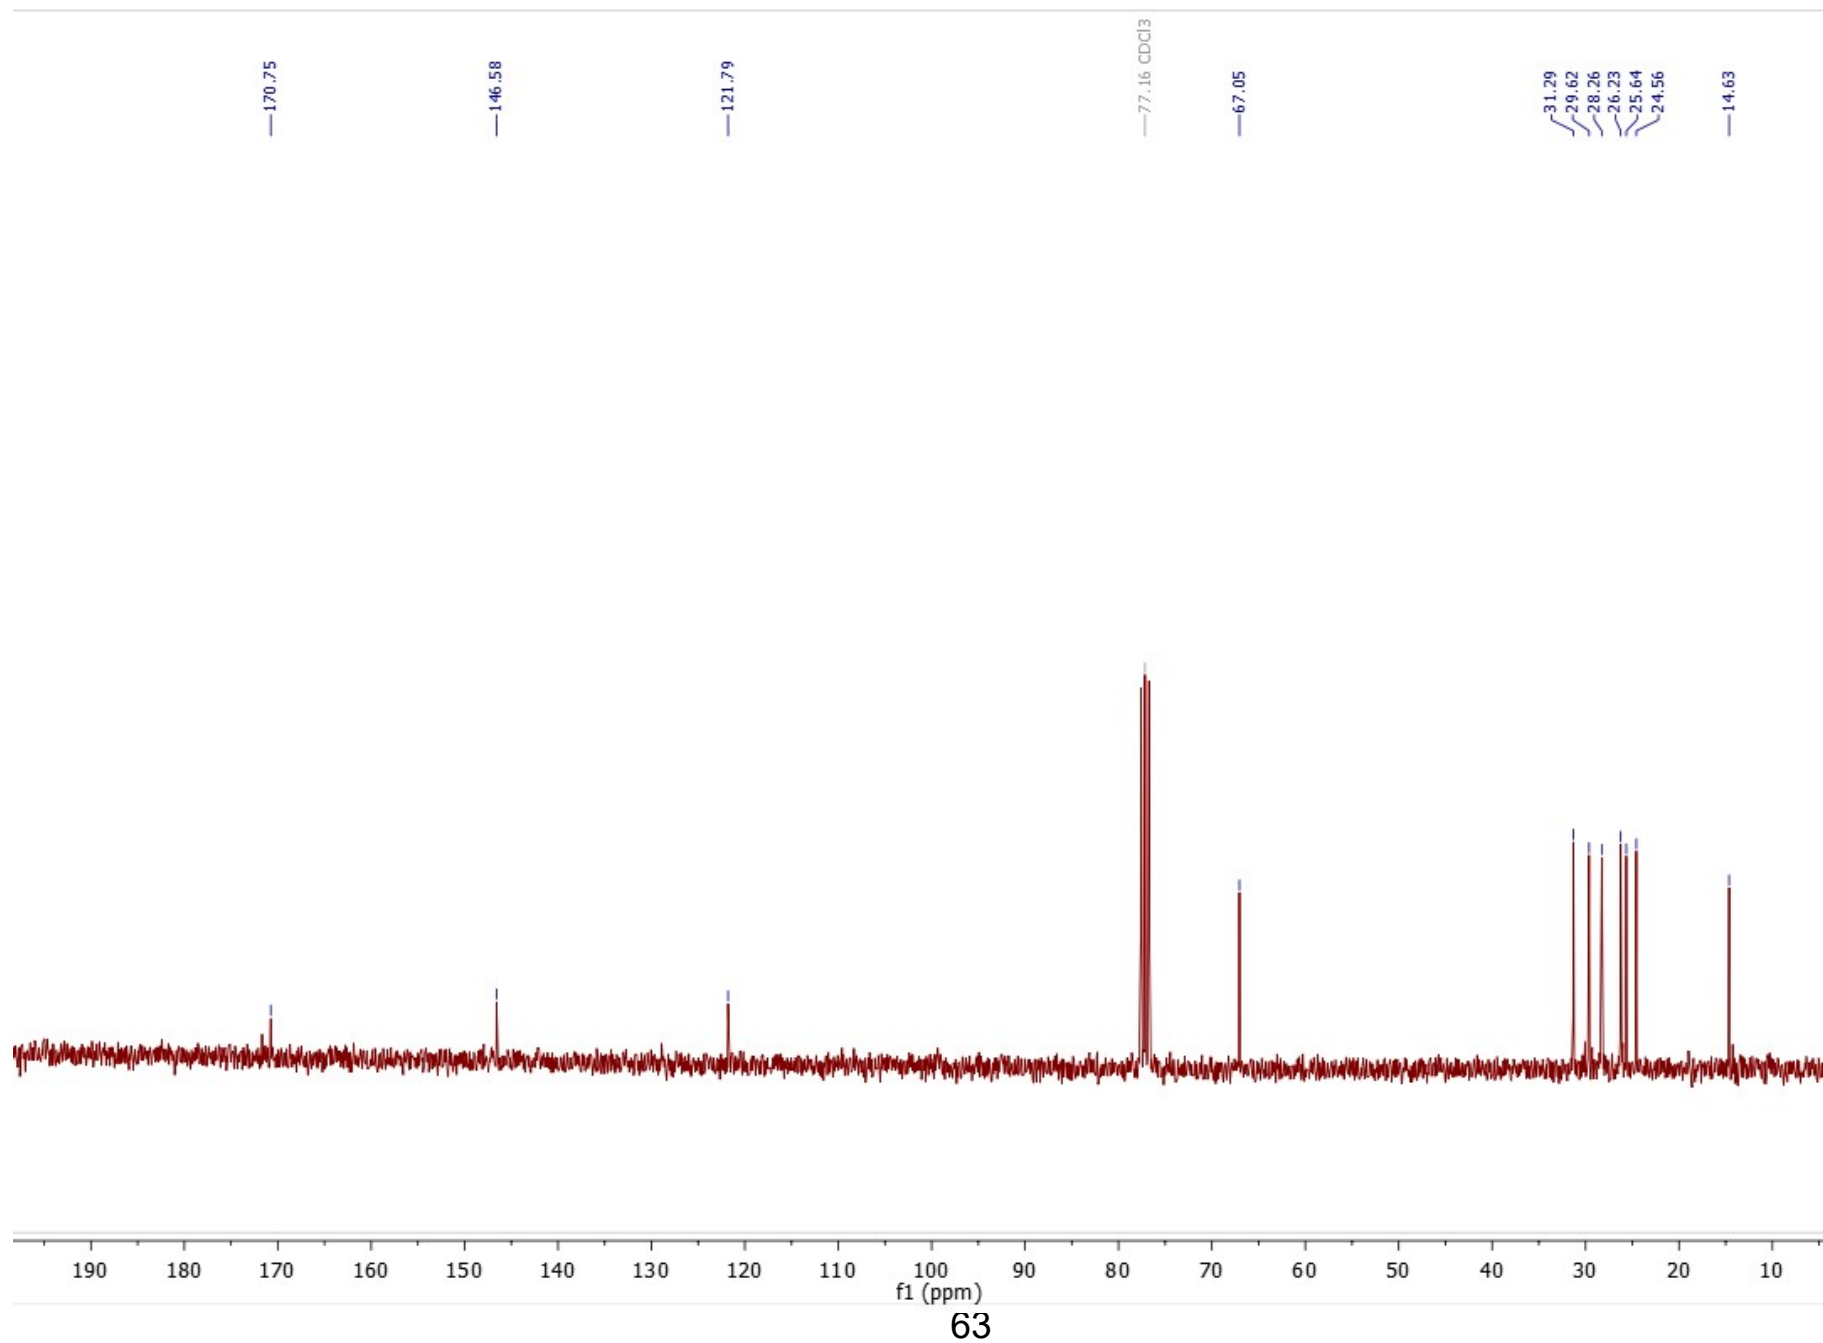

# Ethyl 2-ethoxythiazole-4-carboxylate (3oc)

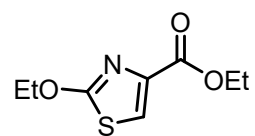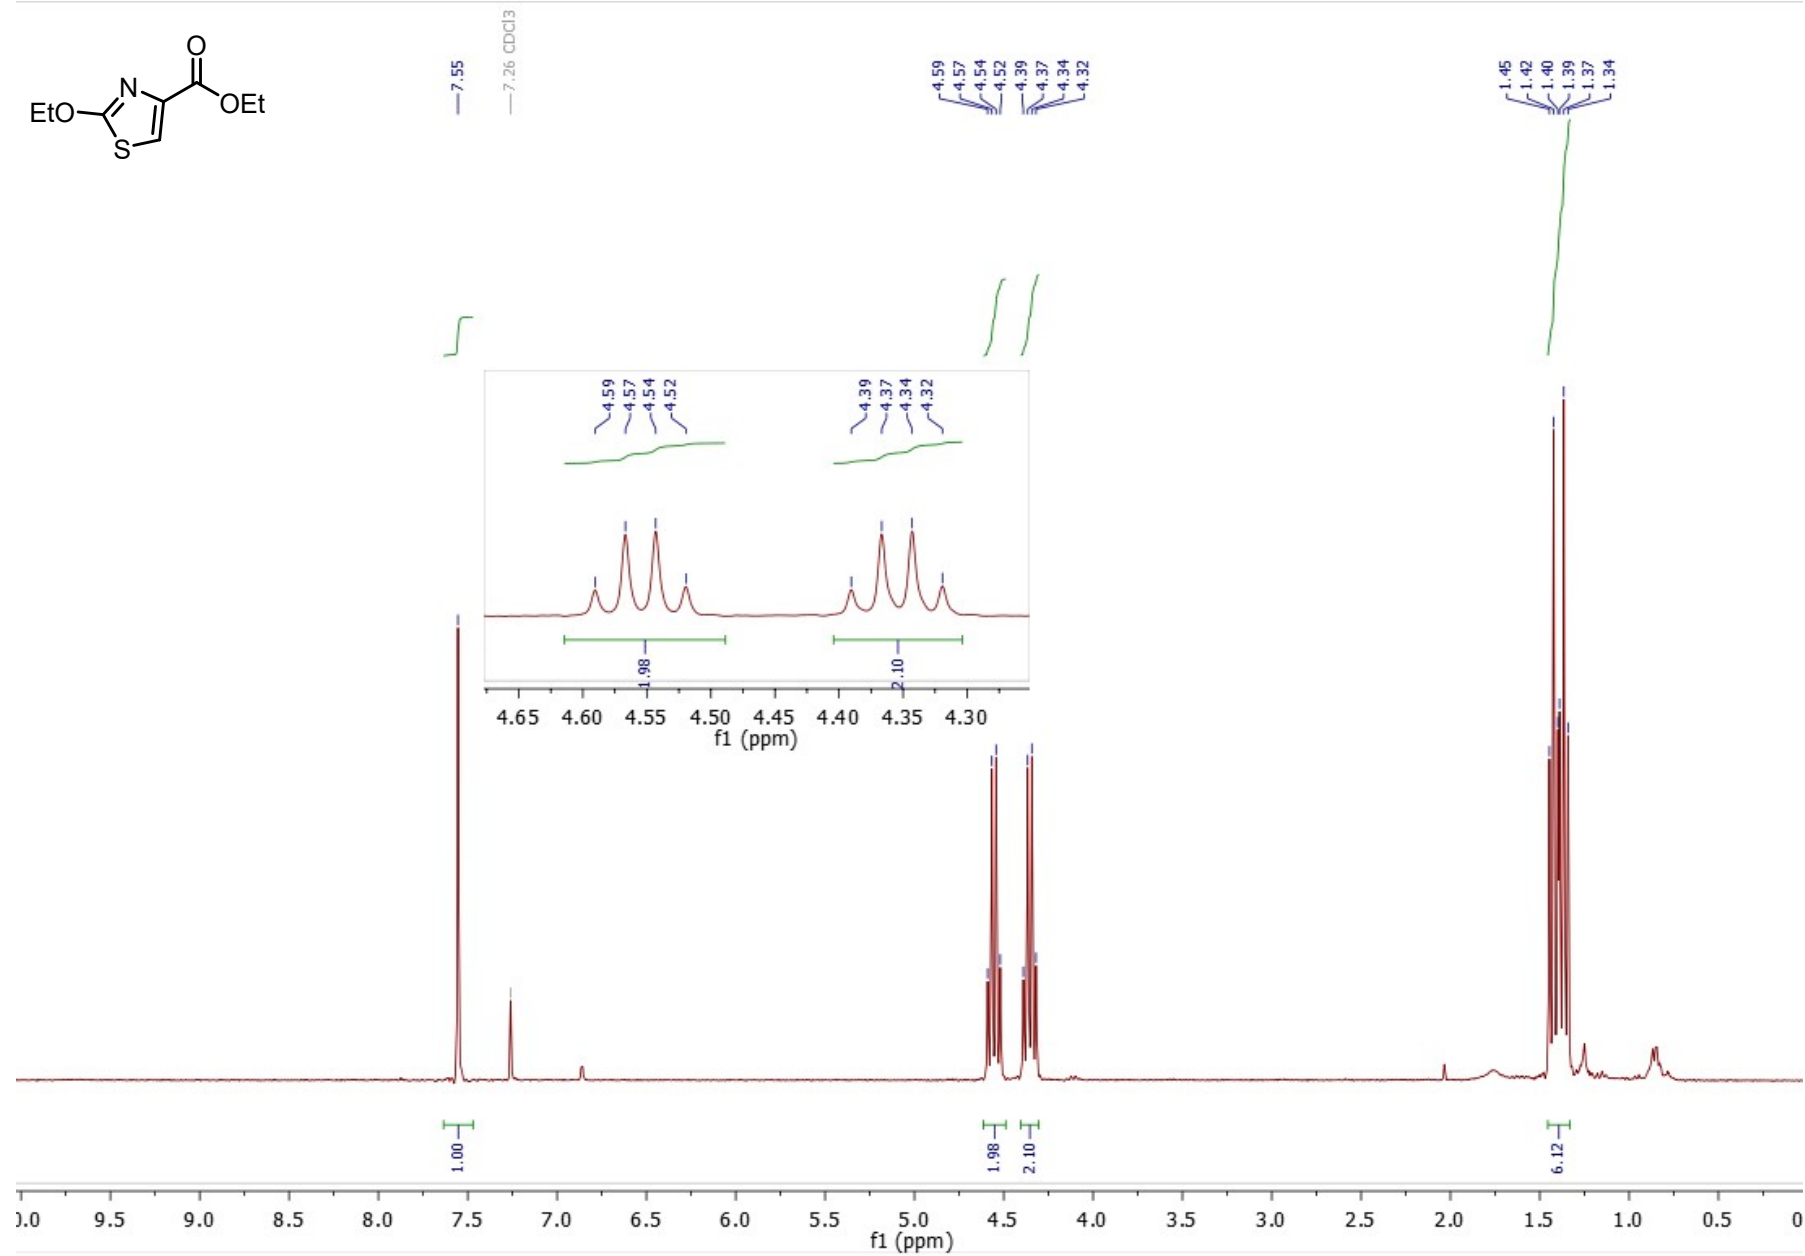

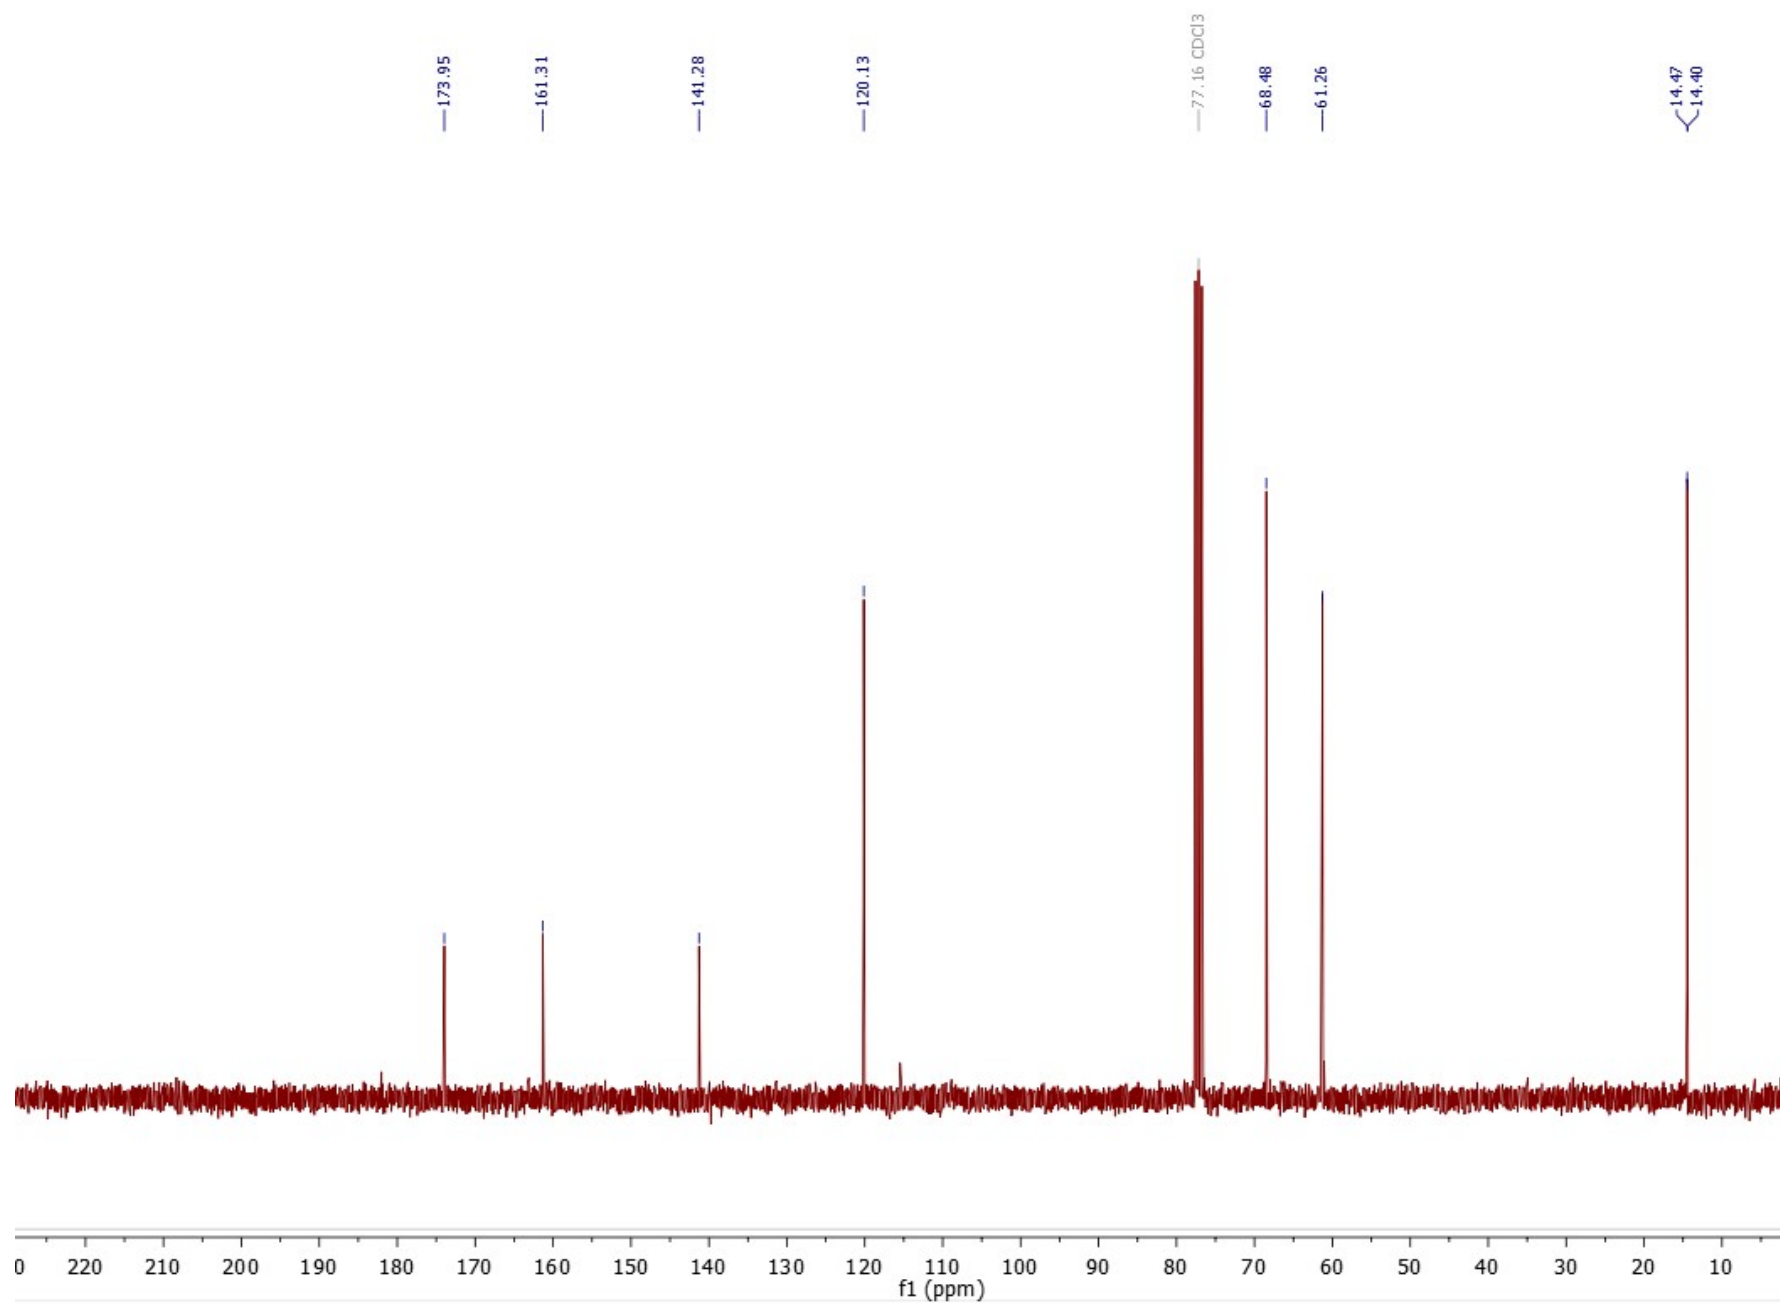

# HRMS spectra of the synthesized compounds

## 2-iso-Butoxy-4-phenylthiazole (3ae)

### Display Report

#### Analysis Info

Analysis Name D:\Data\Kolotyrkina\2022\Mulina\1020017.d  
Method tune\_low.m  
Sample Name /TERN L-91k  
Comment C13H15NOS mH 234.0947 clb added CH3CN

Acquisition Date 20.10.2022 15:08:01

Operator BDAL@DE

Instrument / Ser# microTOF 10248

#### Acquisition Parameter

|             |            |                      |          |                  |           |
|-------------|------------|----------------------|----------|------------------|-----------|
| Source Type | ESI        | Ion Polarity         | Positive | Set Nebulizer    | 0.4 Bar   |
| Focus       | Not active |                      |          | Set Dry Heater   | 180 °C    |
| Scan Begin  | 50 m/z     | Set Capillary        | 4500 V   | Set Dry Gas      | 4.0 l/min |
| Scan End    | 2500 m/z   | Set End Plate Offset | -500 V   | Set Divert Valve | Waste     |

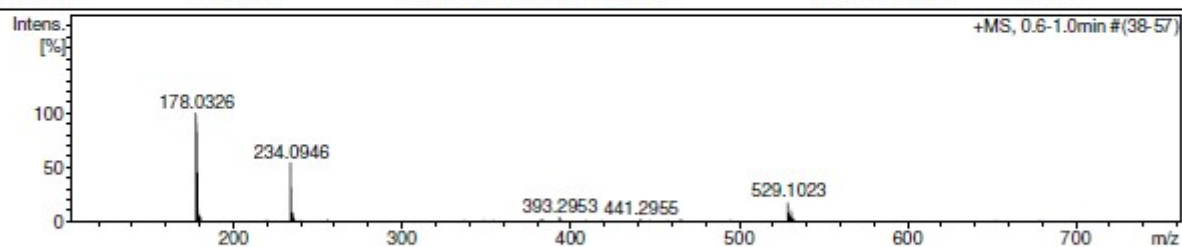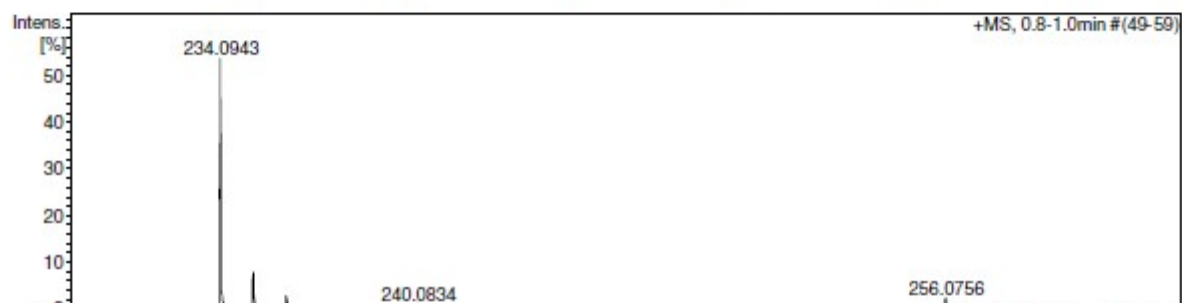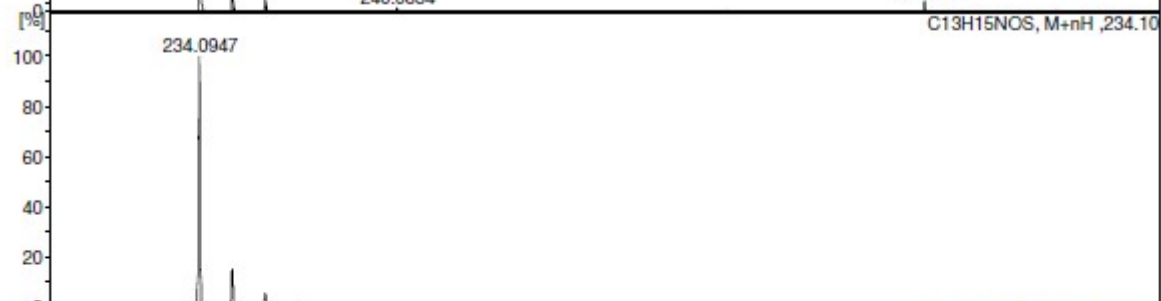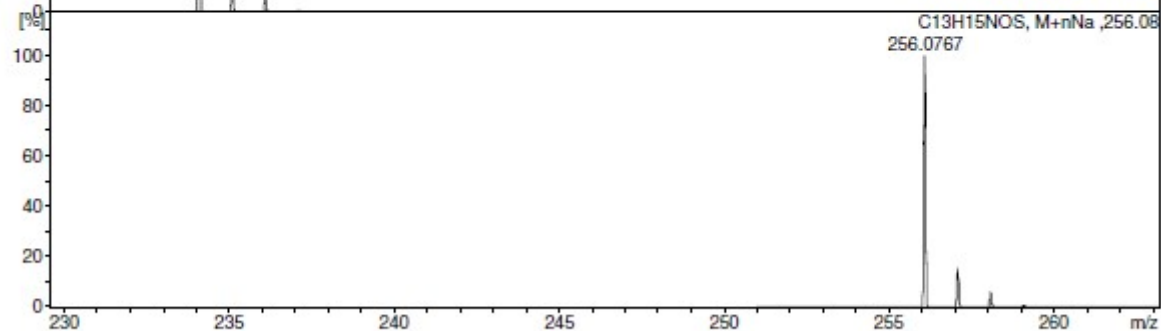

## 2-Nonyloxy-4-phenylthiazole (3af)

### Display Report

#### Analysis Info

Analysis Name D:\Data\Kolotyrkina\2022\Mulina\0615018.d  
Method tune\_50-1600\_pos\_15\_12.m  
Sample Name /TERN L-52K  
Comment C18H25NOS mH 304.1729 calibrant added, CH3CN

Acquisition Date 15.06.2022 15:23:33

Operator BDAL@DE  
Instrument / Ser# microTOF 10248

#### Acquisition Parameter

|             |            |                      |          |                  |           |
|-------------|------------|----------------------|----------|------------------|-----------|
| Source Type | ESI        | Ion Polarity         | Positive | Set Nebulizer    | 0.4 Bar   |
| Focus       | Not active |                      |          | Set Dry Heater   | 180 °C    |
| Scan Begin  | 50 m/z     | Set Capillary        | 4500 V   | Set Dry Gas      | 4.0 l/min |
| Scan End    | 1600 m/z   | Set End Plate Offset | -500 V   | Set Divert Valve | Waste     |

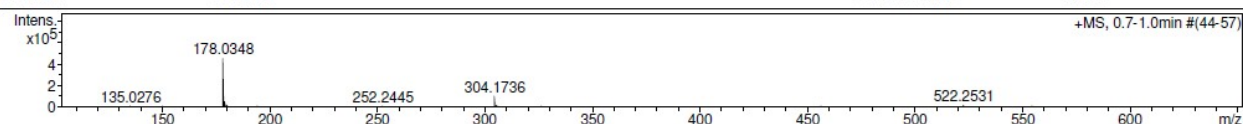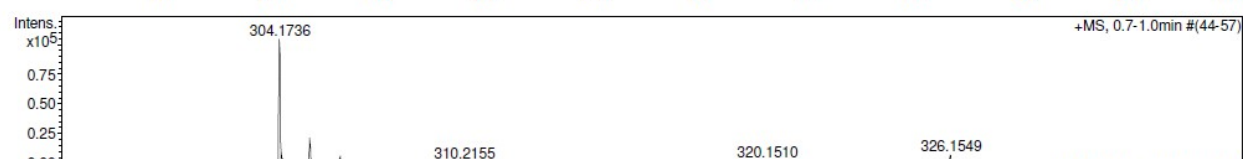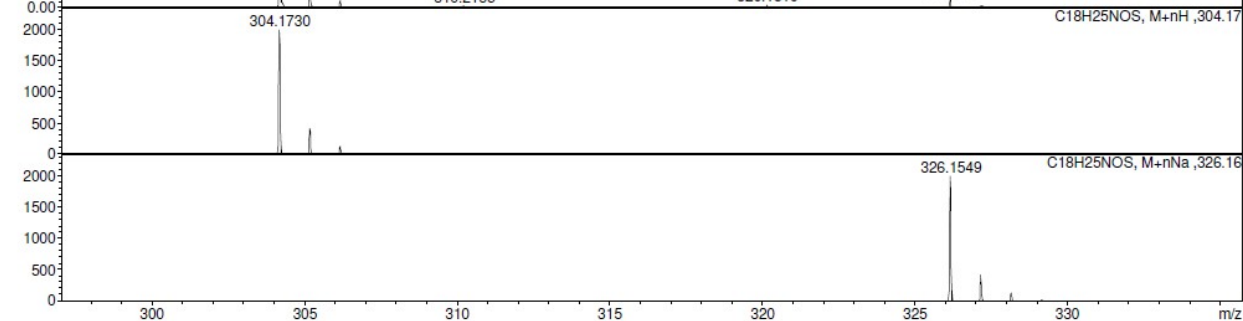

## 2-tert-Butoxy-4-phenylthiazole (3ag)

### Display Report

#### Analysis Info

Analysis Name D:\Data\Kolotyrkina\2022\Mulina\0711006.d  
Method tune\_low.m  
Sample Name /TERN L-50kt  
Comment C13H15NOS mH 234.0947 clb added CH3CN

Acquisition Date 11.07.2022 14:01:38

Operator BDAL@DE

Instrument / Ser# maXis 43

#### Acquisition Parameter

|             |            |                      |          |                  |           |
|-------------|------------|----------------------|----------|------------------|-----------|
| Source Type | ESI        | Ion Polarity         | Positive | Set Nebulizer    | 0.4 Bar   |
| Focus       | Not active |                      |          | Set Dry Heater   | 180 °C    |
| Scan Begin  | 50 m/z     | Set Capillary        | 4500 V   | Set Dry Gas      | 4.0 l/min |
| Scan End    | 1500 m/z   | Set End Plate Offset | -500 V   | Set Divert Valve | Source    |

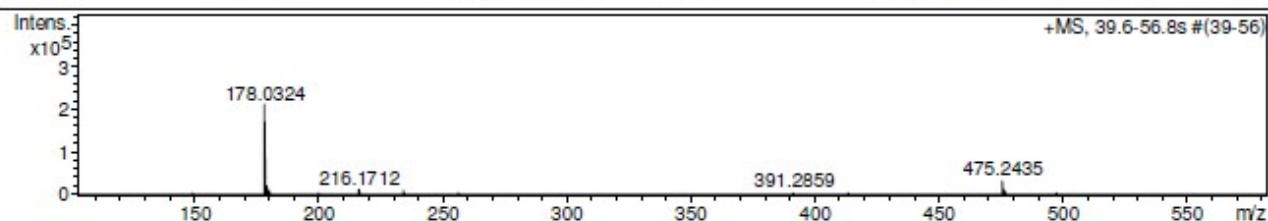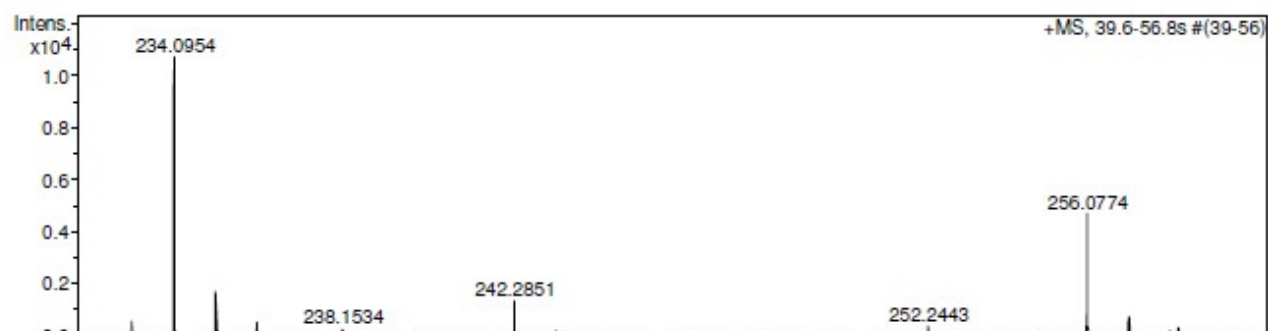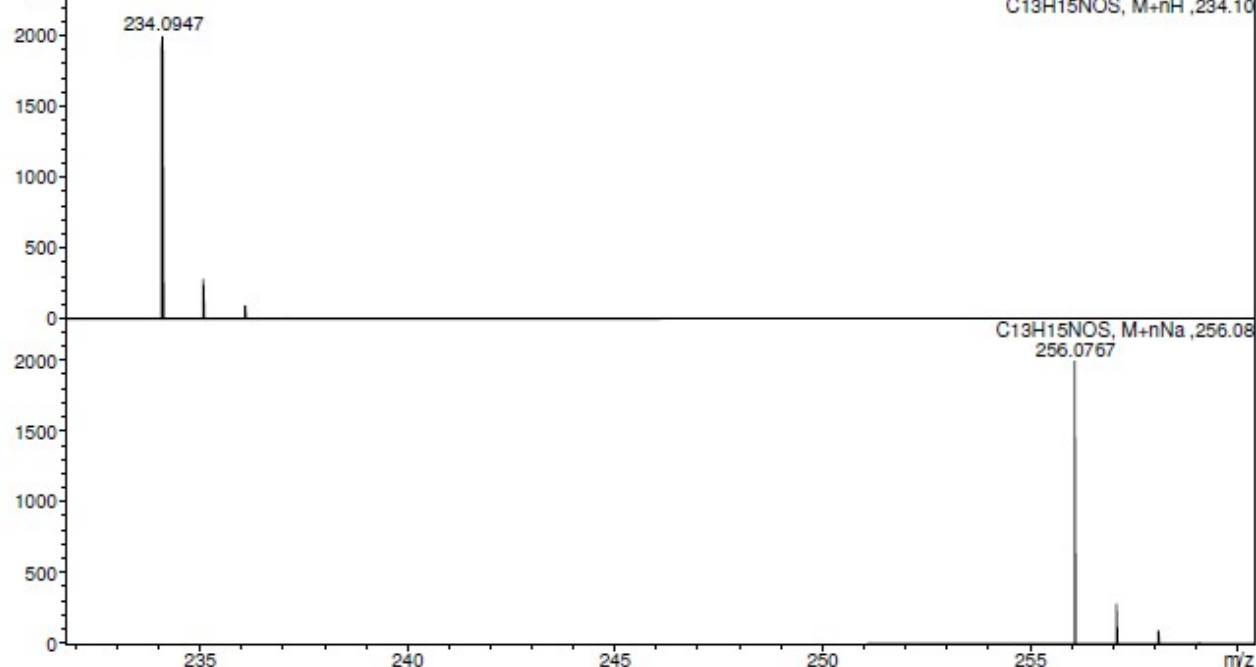

## 2-Benzyloxy-4-phenylthiazole (3ah)

### Display Report

#### Analysis Info

Analysis Name D:\Data\Kolotyrkina\2024\Zaikina\0326051.d  
Method tune\_low.m  
Sample Name /TERN L-47  
Comment C16H13NOS mH268.0790 clb added CH3OH

Acquisition Date 26.03.2024 19:27:07

Operator BDAL@DE  
Instrument / Ser# micrOTOF 10248

#### Acquisition Parameter

|             |            |                      |          |                  |           |
|-------------|------------|----------------------|----------|------------------|-----------|
| Source Type | ESI        | Ion Polarity         | Positive | Set Nebulizer    | 0.4 Bar   |
| Focus       | Not active |                      |          | Set Dry Heater   | 180 °C    |
| Scan Begin  | 50 m/z     | Set Capillary        | 4500 V   | Set Dry Gas      | 4.0 l/min |
| Scan End    | 3000 m/z   | Set End Plate Offset | -500 V   | Set Divert Valve | Waste     |

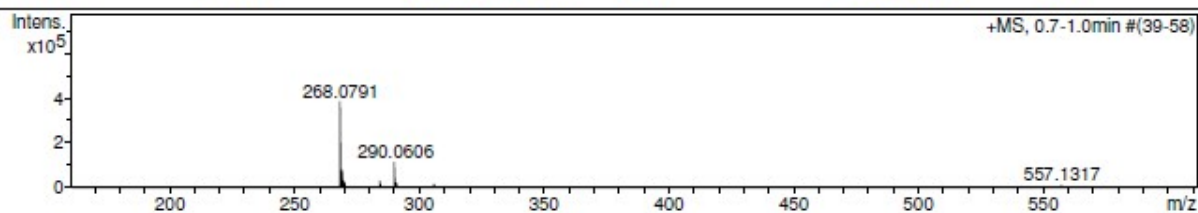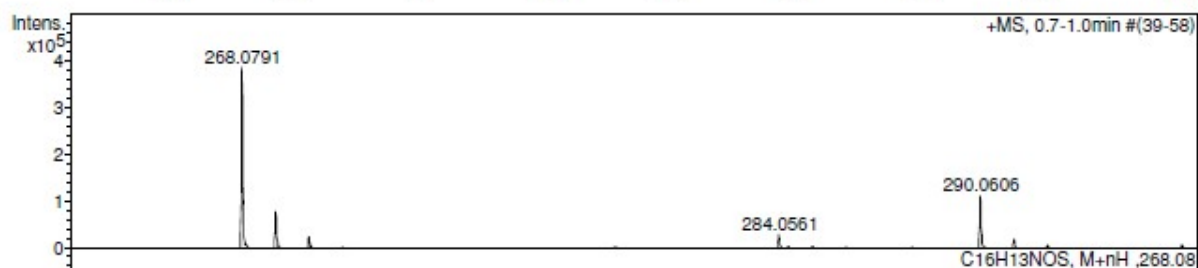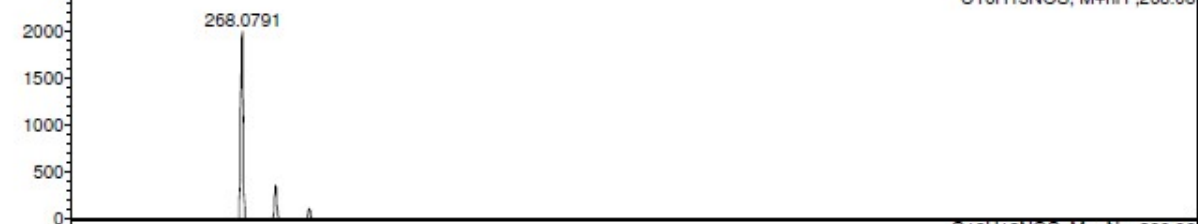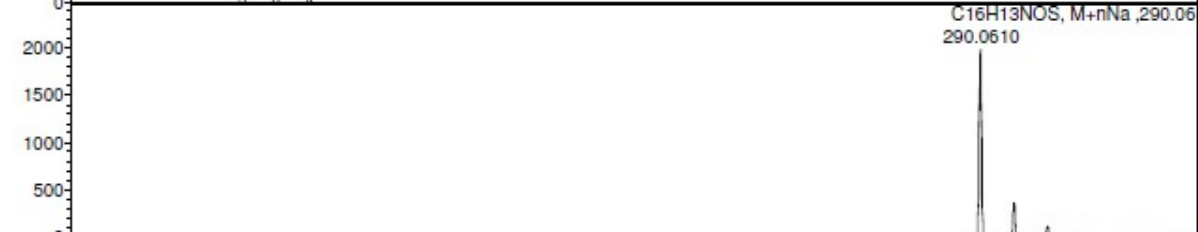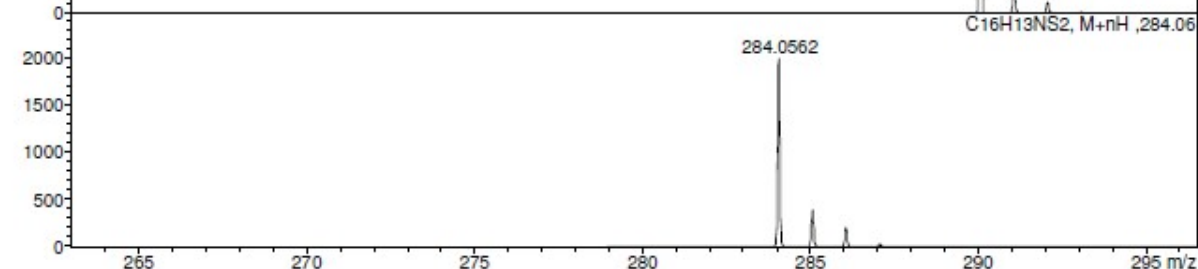

## 2-(Allyloxy)-4-phenylthiazole (3ai)

### Display Report

#### Analysis Info

Analysis Name D:\Data\Chizhov\Terentiev\Mulina\I-130k\_&clblow.d  
Method tune\_low.m  
Sample Name /TERN L-130K  
Comment CH3CN 100 %, dil. 200, calibrant added

Acquisition Date 07.04.2023 18:45:38

Operator BDAL@DE

Instrument / Ser# micrOTOF 10248

#### Acquisition Parameter

|             |            |                      |          |                  |           |
|-------------|------------|----------------------|----------|------------------|-----------|
| Source Type | ESI        | Ion Polarity         | Positive | Set Nebulizer    | 0.4 Bar   |
| Focus       | Not active |                      |          | Set Dry Heater   | 180 °C    |
| Scan Begin  | 50 m/z     | Set Capillary        | 4500 V   | Set Dry Gas      | 4.0 l/min |
| Scan End    | 3000 m/z   | Set End Plate Offset | -500 V   | Set Divert Valve | Waste     |

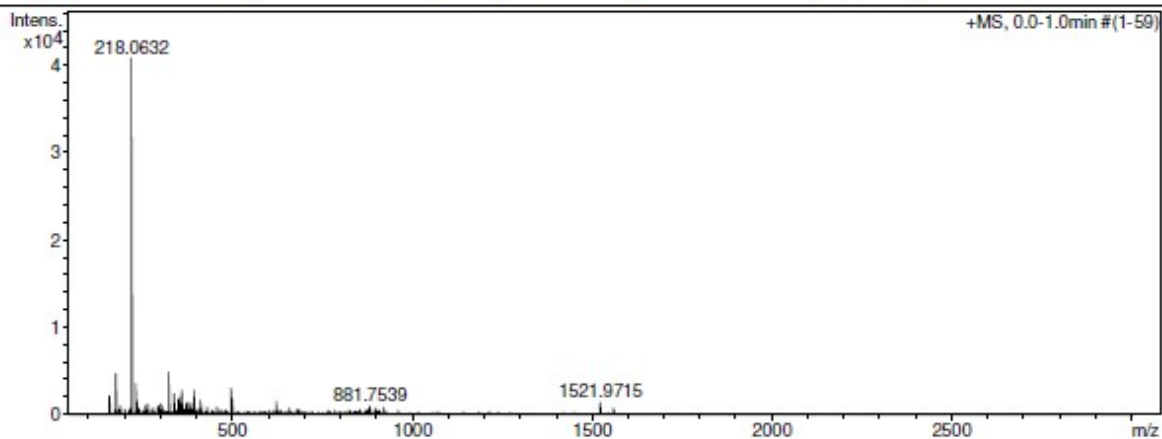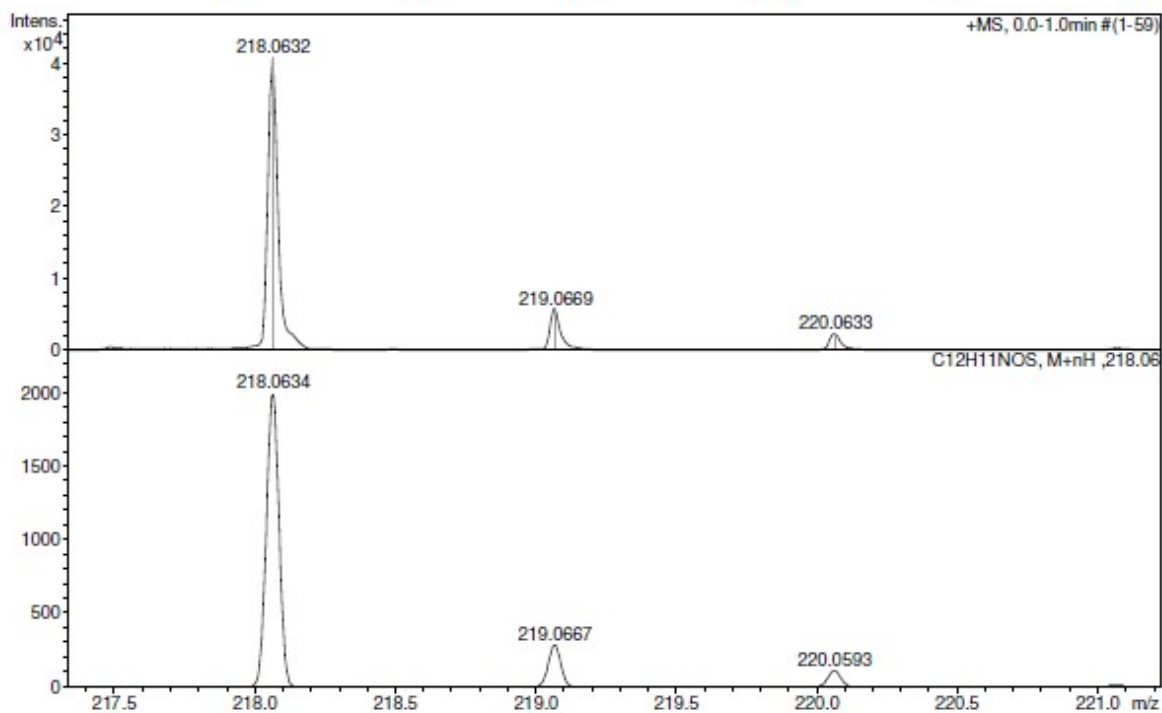

(Z)-2-(Hex-3-en-1-yloxy)-4-phenylthiazole (3aj)

Display Report

Analysis Info

Analysis Name D:\Data\Kolotyrkina\2022\Mulina\1020019.d  
Method tune\_low.m  
Sample Name /TERN L-93k  
Comment C15H17NOS mH 260.1103 clb added CH3CN

Acquisition Date 20.10.2022 15:32:15

Operator BDAL@DE  
Instrument / Ser# micrOTOF 10248

Acquisition Parameter

|             |            |                      |          |                  |           |
|-------------|------------|----------------------|----------|------------------|-----------|
| Source Type | ESI        | Ion Polarity         | Positive | Set Nebulizer    | 0.4 Bar   |
| Focus       | Not active |                      |          | Set Dry Heater   | 180 °C    |
| Scan Begin  | 50 m/z     | Set Capillary        | 4500 V   | Set Dry Gas      | 4.0 l/min |
| Scan End    | 2500 m/z   | Set End Plate Offset | -500 V   | Set Divert Valve | Waste     |

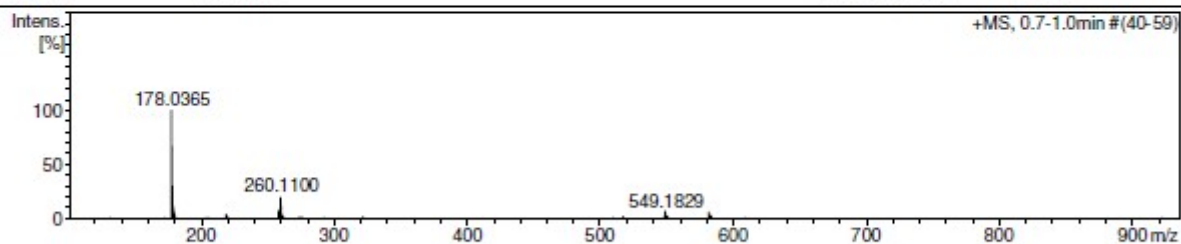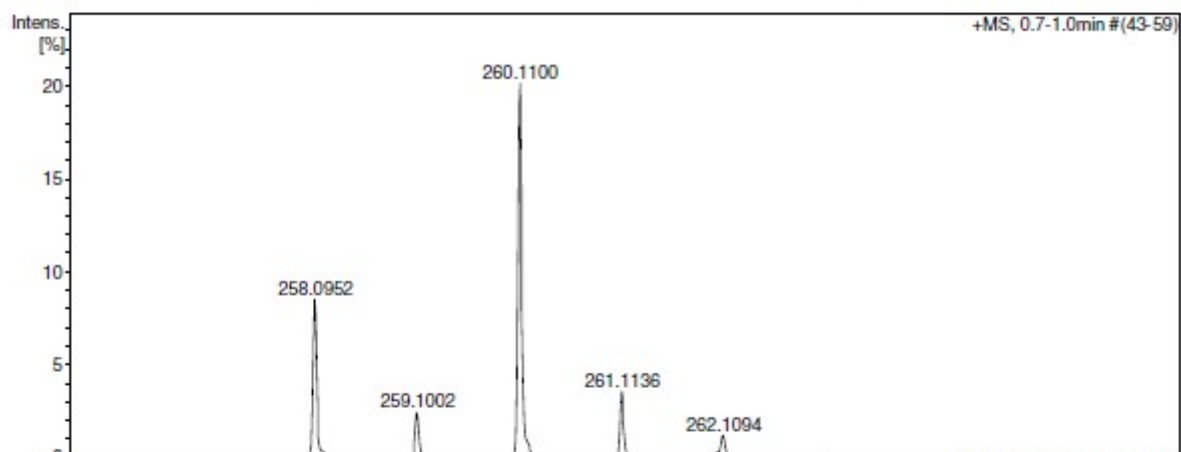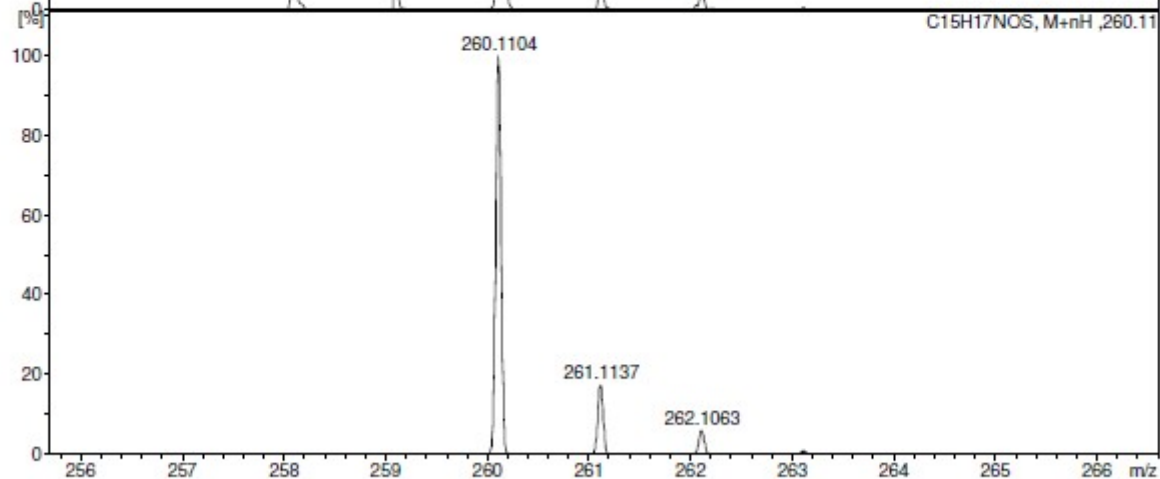

## 2-Ethoxy4-(4-(*tert*-butyl)phenyl)thiazole (3cc)

### Display Report

#### Analysis Info

Analysis Name D:\Data\Kolotyrkina\2022\Mulina\0711005.d  
Method tune\_low.m  
Sample Name /TERN L-62K  
Comment C15H19NOS mH 262.1260 clb added CH3CN

Acquisition Date 11.07.2022 13:49:44

Operator BDAL@DE

Instrument / Ser# maXis 43

#### Acquisition Parameter

|             |            |                      |          |                  |           |
|-------------|------------|----------------------|----------|------------------|-----------|
| Source Type | ESI        | Ion Polarity         | Positive | Set Nebulizer    | 0.4 Bar   |
| Focus       | Not active |                      |          | Set Dry Heater   | 180 °C    |
| Scan Begin  | 50 m/z     | Set Capillary        | 4500 V   | Set Dry Gas      | 4.0 l/min |
| Scan End    | 1500 m/z   | Set End Plate Offset | -500 V   | Set Divert Valve | Source    |

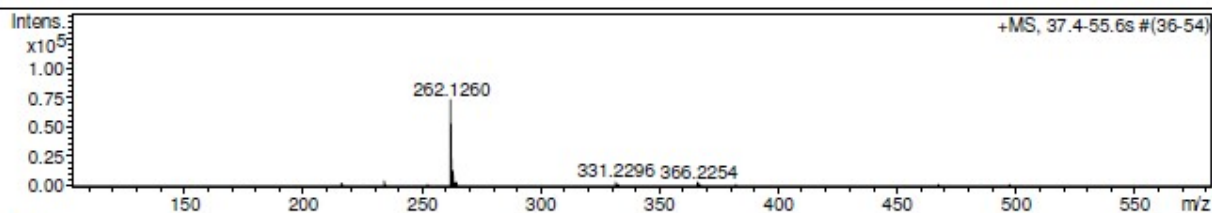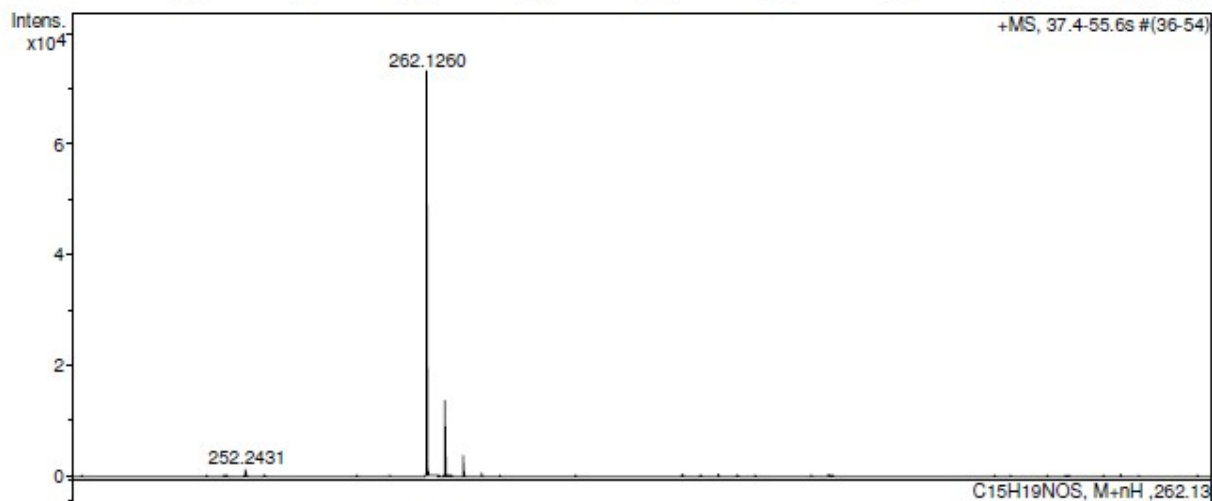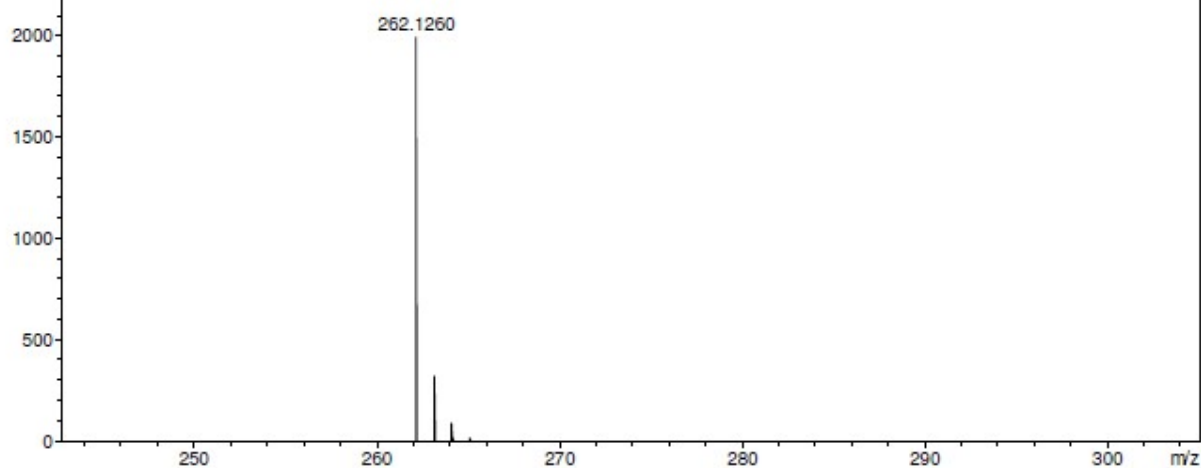

## 2-Ethoxy-4-(2-methoxyphenyl)thiazole (3ec)

### Display Report

#### Analysis Info

Analysis Name D:\Data\Kolotyrkina\2022\Mulina\0719017.d  
Method tune\_low.m  
Sample Name /TERN L-68k  
Comment C12H13NO2S mH 236.0740 clb added CH3CN

Acquisition Date 19.07.2022 15:29:06

Operator BDAL@DE  
Instrument / Ser# maXis 43

#### Acquisition Parameter

|             |            |                      |          |                  |           |
|-------------|------------|----------------------|----------|------------------|-----------|
| Source Type | ESI        | Ion Polarity         | Positive | Set Nebulizer    | 0.4 Bar   |
| Focus       | Not active |                      |          | Set Dry Heater   | 180 °C    |
| Scan Begin  | 50 m/z     | Set Capillary        | 4500 V   | Set Dry Gas      | 4.0 l/min |
| Scan End    | 1500 m/z   | Set End Plate Offset | -500 V   | Set Divert Valve | Source    |

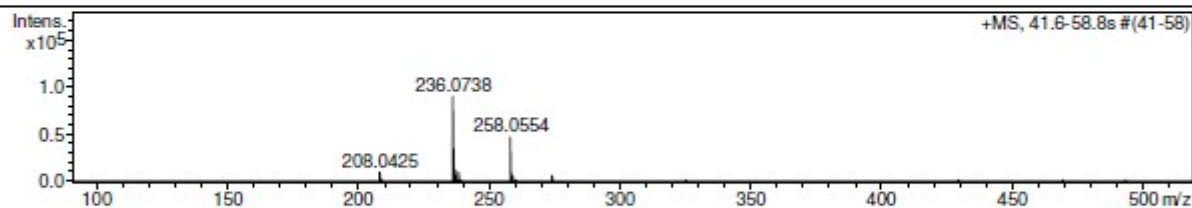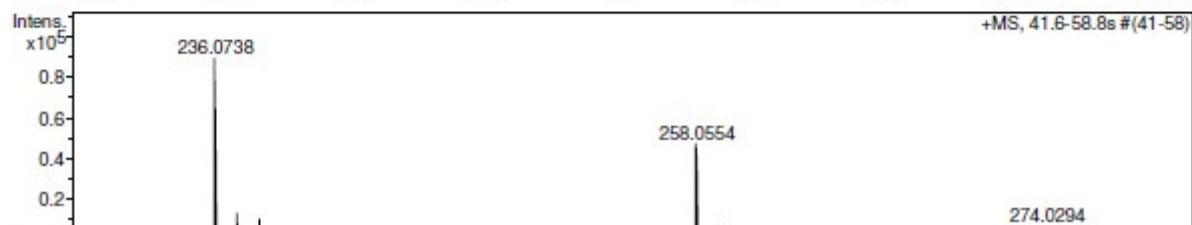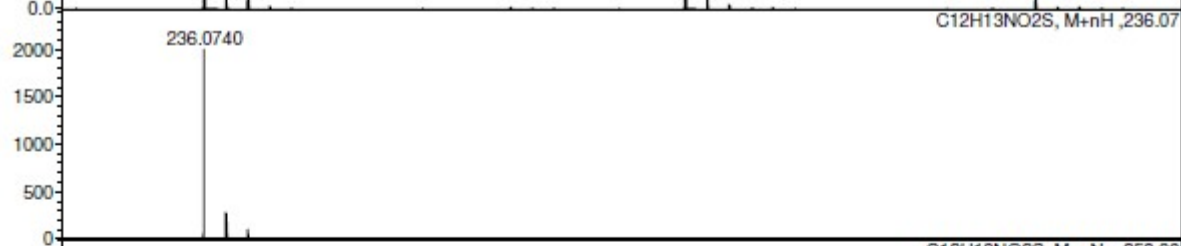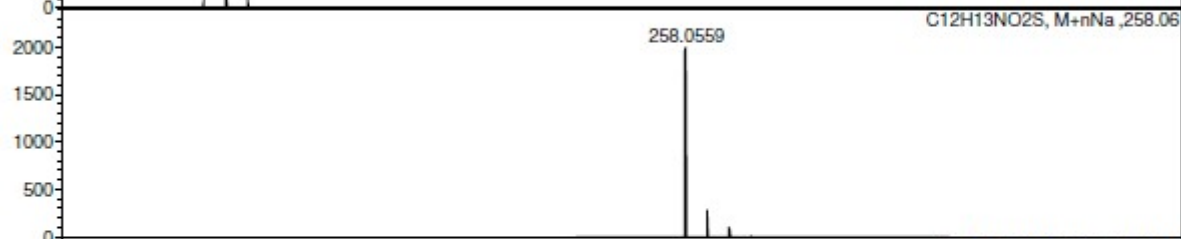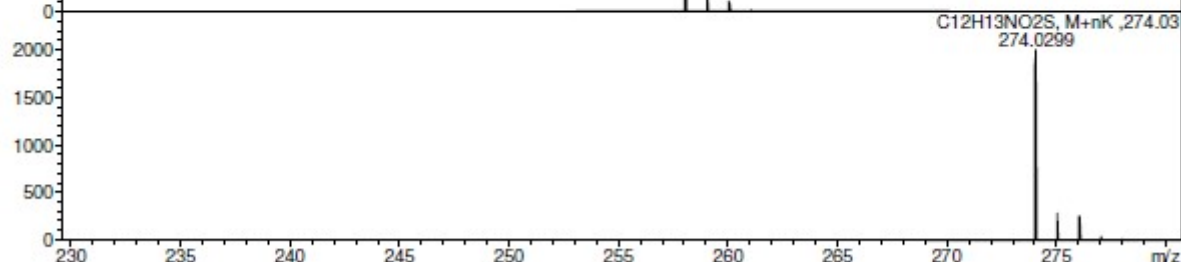

## 2-Ethoxy-4-(3-bromophenyl)thiazole (3hc)

### Display Report

#### Analysis Info

Analysis Name D:\Data\Kolotyrkina\2022\Mulina\0714015.d  
Method tune\_low.m  
Sample Name /TERN L-67  
Comment C11H10BrNOS mH 283.9739 clb added CH3CN

Acquisition Date 14.07.2022 14:41:38

Operator BDAL@DE  
Instrument / Ser# maXis 43

#### Acquisition Parameter

|             |            |                      |          |                  |           |
|-------------|------------|----------------------|----------|------------------|-----------|
| Source Type | ESI        | Ion Polarity         | Positive | Set Nebulizer    | 1.0 Bar   |
| Focus       | Not active |                      |          | Set Dry Heater   | 200 °C    |
| Scan Begin  | 50 m/z     | Set Capillary        | 4500 V   | Set Dry Gas      | 4.0 l/min |
| Scan End    | 1200 m/z   | Set End Plate Offset | -500 V   | Set Divert Valve | Source    |

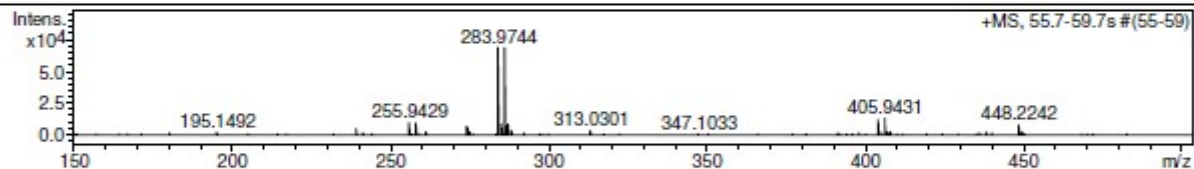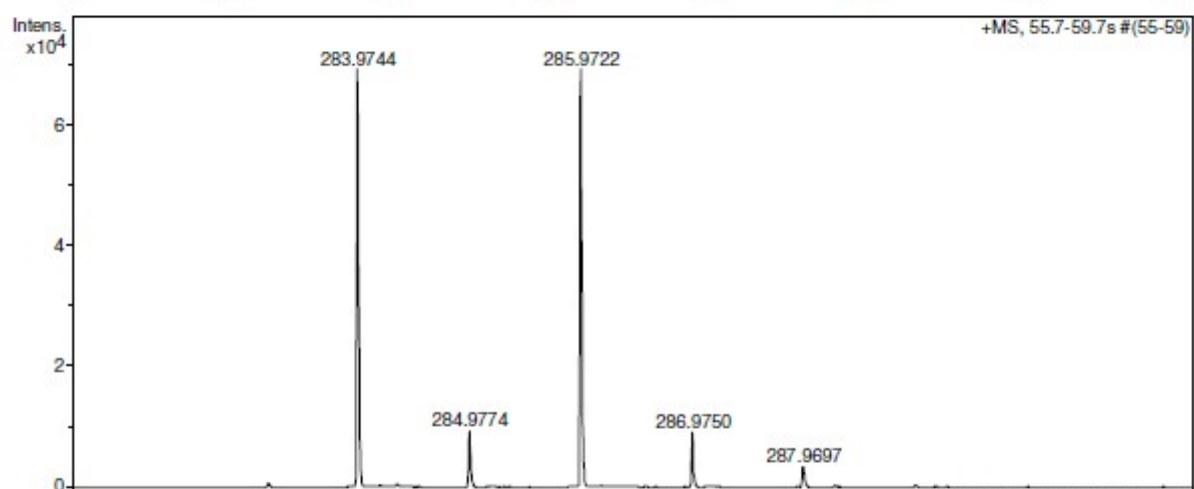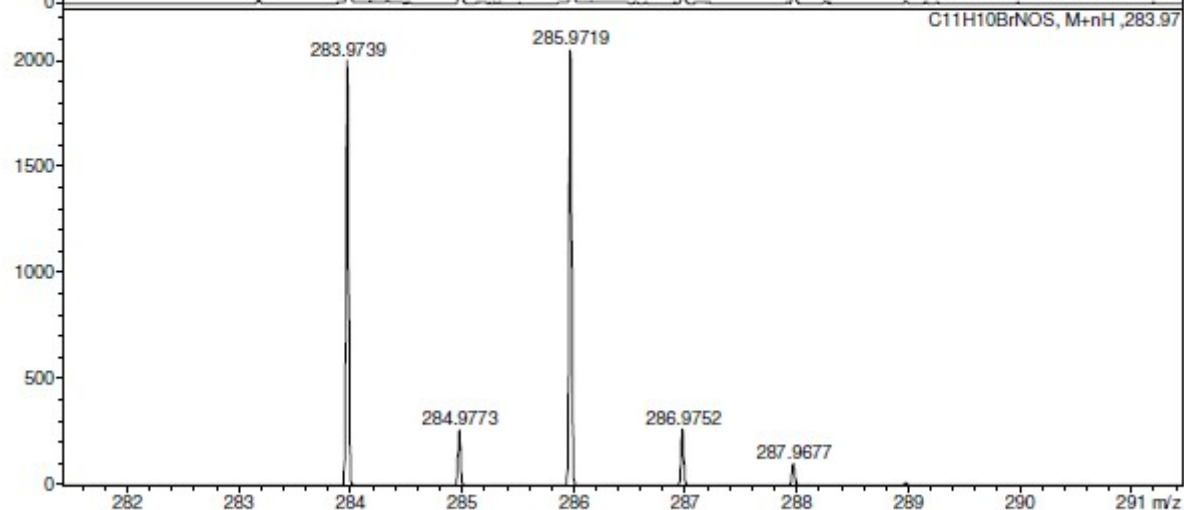

## 2-Ethoxy-4-(4-(azidomethyl)phenyl)thiazole (3ic)

### Display Report

#### Analysis Info

Analysis Name D:\Data\Kolotyrkina\2022\Mulina\0714014.d  
Method tune\_low.m  
Sample Name /TERN L-64  
Comment C12H12N4OS mH 261.0804 clb added CH3CN

Acquisition Date 14.07.2022 14:35:49

Operator BDAL@DE  
Instrument / Ser# maXis 43

#### Acquisition Parameter

|             |            |                      |          |                  |           |
|-------------|------------|----------------------|----------|------------------|-----------|
| Source Type | ESI        | Ion Polarity         | Positive | Set Nebulizer    | 1.0 Bar   |
| Focus       | Not active |                      |          | Set Dry Heater   | 200 °C    |
| Scan Begin  | 50 m/z     | Set Capillary        | 4500 V   | Set Dry Gas      | 4.0 l/min |
| Scan End    | 1200 m/z   | Set End Plate Offset | -500 V   | Set Divert Valve | Source    |

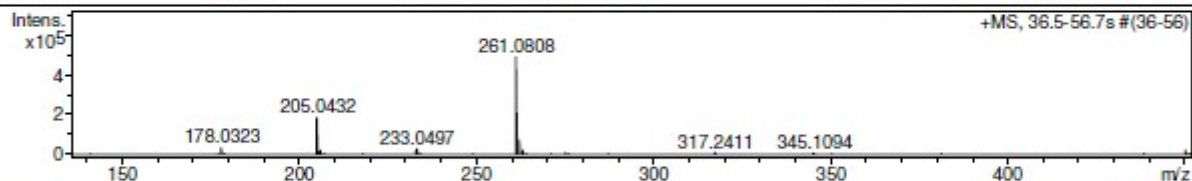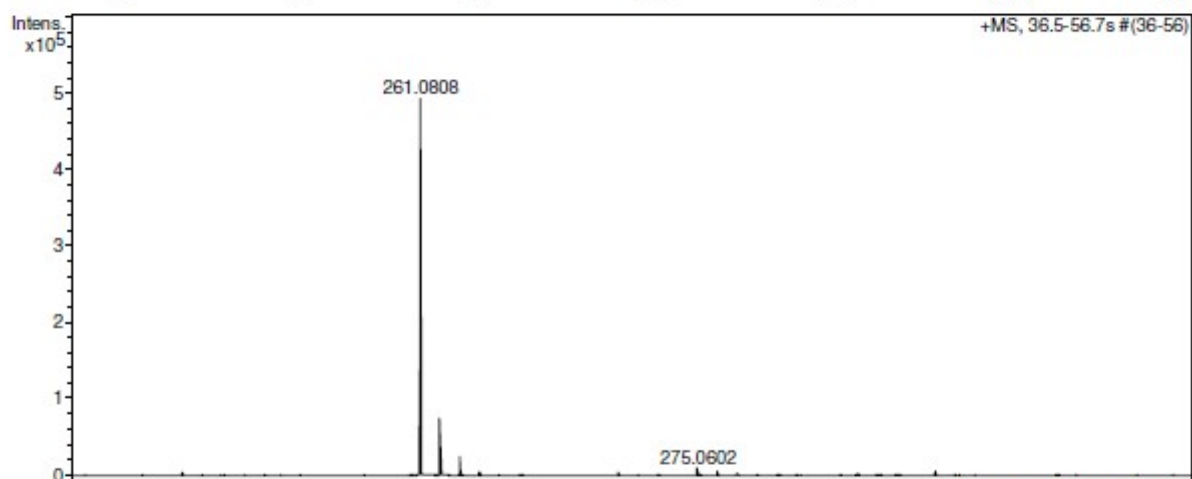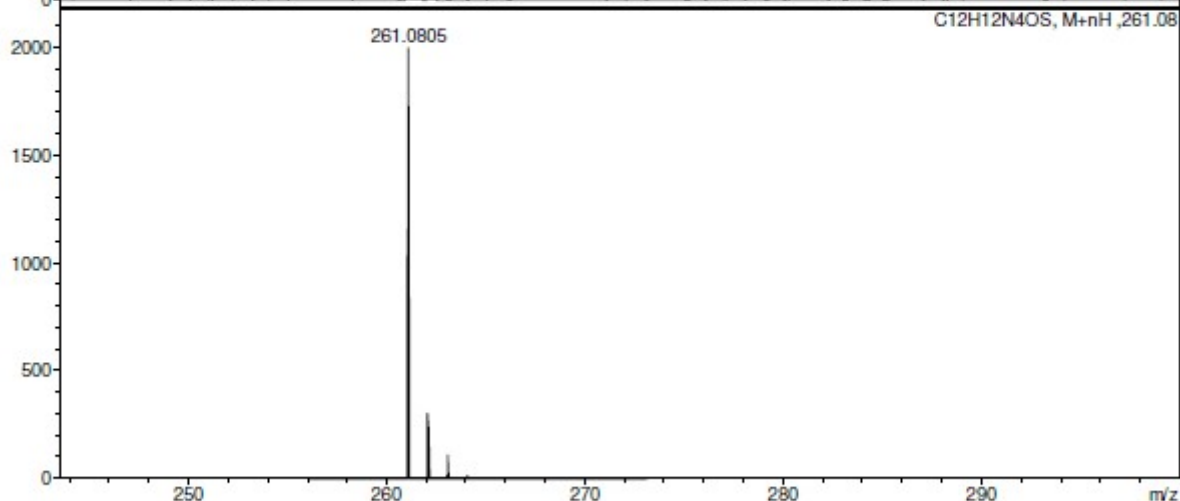

## 2-Ethoxy-4-octylthiazole (3lc)

### Display Report

#### Analysis Info

Analysis Name D:\Data\Kolotyrkina\2022\Mulina\0718004.d  
Method tune\_100-1200.m  
Sample Name /TERN L-73  
Comment C13H23NOS mH 242.1573 clb added CH3CN

Acquisition Date 18.07.2022 17:02:03

Operator BDAL@DE  
Instrument / Ser# maXis 43

#### Acquisition Parameter

|             |          |                      |          |                  |           |
|-------------|----------|----------------------|----------|------------------|-----------|
| Source Type | ESI      | Ion Polarity         | Positive | Set Nebulizer    | 1.0 Bar   |
| Focus       | Active   |                      |          | Set Dry Heater   | 200 °C    |
| Scan Begin  | 50 m/z   | Set Capillary        | 4500 V   | Set Dry Gas      | 4.0 l/min |
| Scan End    | 1500 m/z | Set End Plate Offset | -500 V   | Set Divert Valve | Waste     |

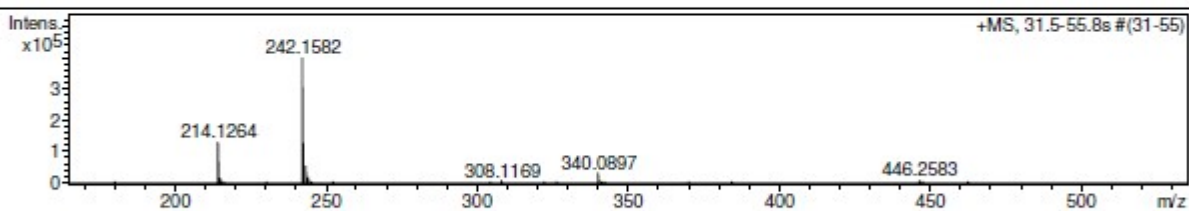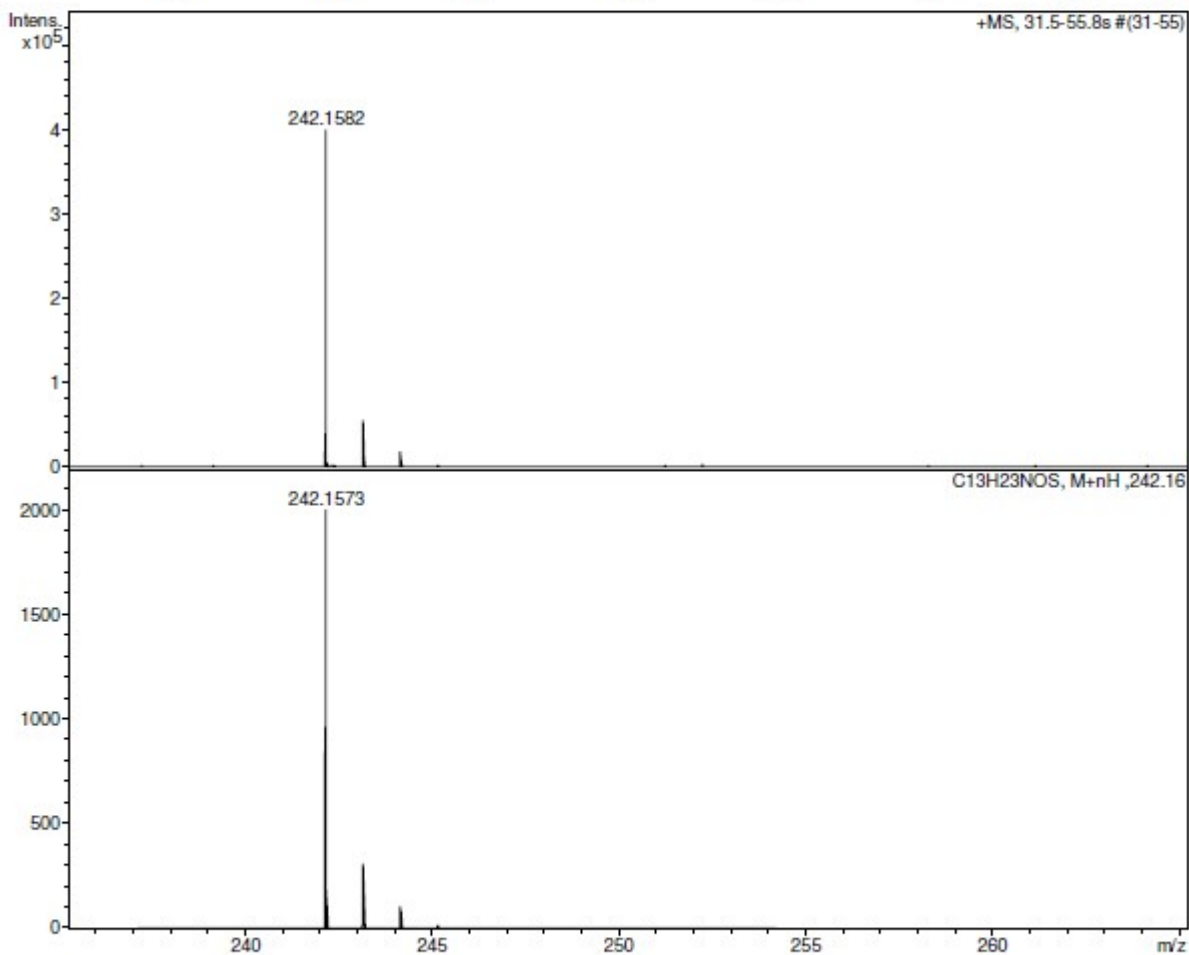

## 2-Ethoxy-4-decylthiazole (3mc)

### Display Report

#### Analysis Info

Analysis Name D:\Data\Kolotyrkina\2022\Mulina\0714022.d  
Method tune\_low.m  
Sample Name /TERN L-66  
Comment C15H27NOS mH 270.1886 clb added CH3CN

Acquisition Date 14.07.2022 16:47:14

Operator BDAL@DE  
Instrument / Ser# maXis 43

#### Acquisition Parameter

|             |            |                      |          |                  |           |
|-------------|------------|----------------------|----------|------------------|-----------|
| Source Type | ESI        | Ion Polarity         | Positive | Set Nebulizer    | 1.0 Bar   |
| Focus       | Not active |                      |          | Set Dry Heater   | 200 °C    |
| Scan Begin  | 50 m/z     | Set Capillary        | 4500 V   | Set Dry Gas      | 4.0 l/min |
| Scan End    | 1200 m/z   | Set End Plate Offset | -500 V   | Set Divert Valve | Source    |

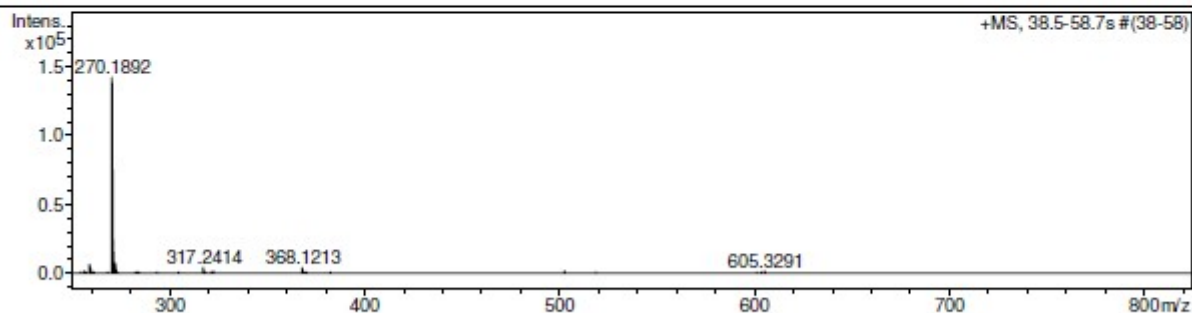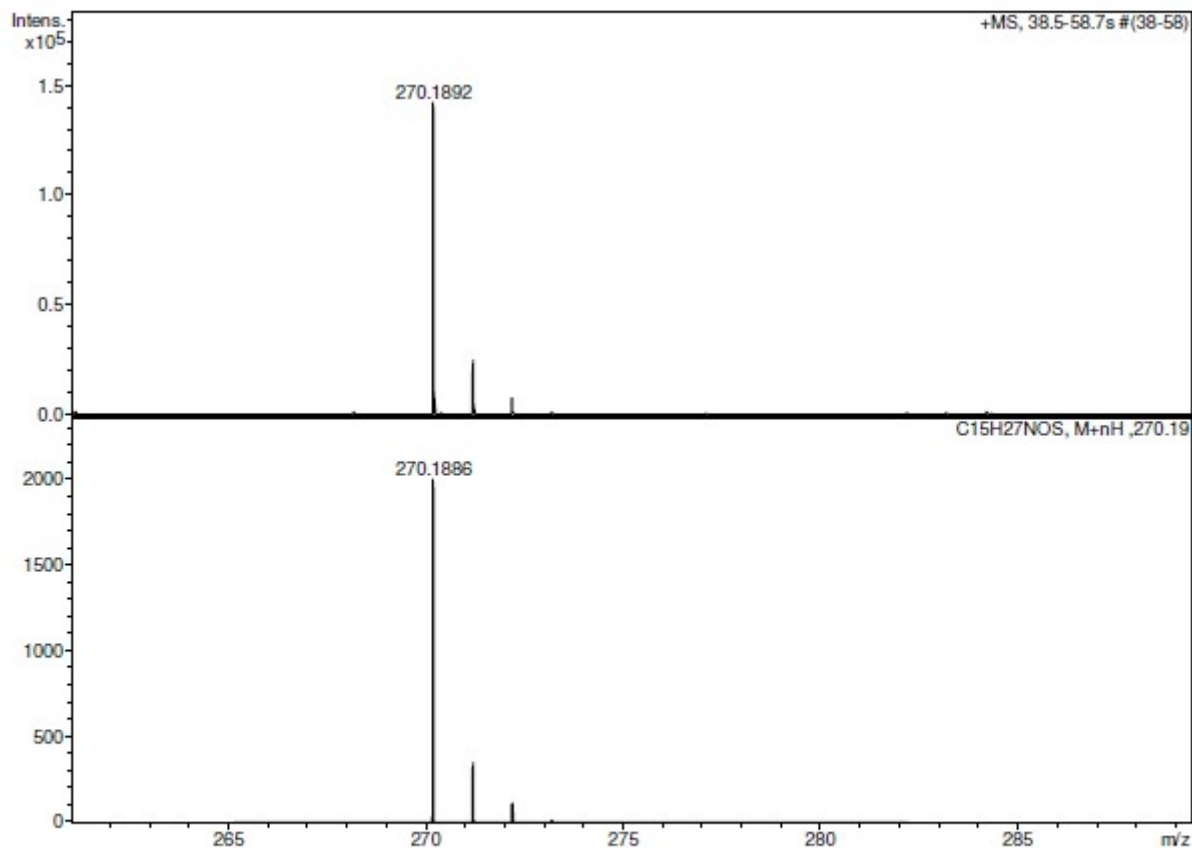

# Ethyl 2-ethoxythiazole-4-carboxylate (3oc)

## Display Report

### Analysis Info

Analysis Name D:\Data\Kolotyrykina\2022\Mulina\0714016.d  
Method tune\_low.m  
Sample Name /TERN L-69  
Comment C8H11NO3S mH 202.0532 clb added CH3CN

Acquisition Date 14.07.2022 14:47:53

Operator BDAL@DE  
Instrument / Ser# maXis 43

### Acquisition Parameter

|             |            |                      |          |                  |           |
|-------------|------------|----------------------|----------|------------------|-----------|
| Source Type | ESI        | Ion Polarity         | Positive | Set Nebulizer    | 1.0 Bar   |
| Focus       | Not active |                      |          | Set Dry Heater   | 200 °C    |
| Scan Begin  | 50 m/z     | Set Capillary        | 4500 V   | Set Dry Gas      | 4.0 l/min |
| Scan End    | 1200 m/z   | Set End Plate Offset | -500 V   | Set Divert Valve | Source    |

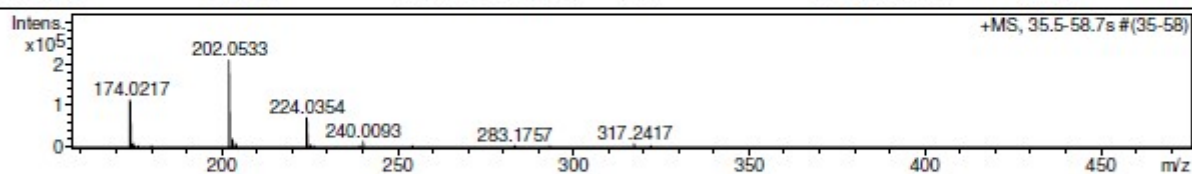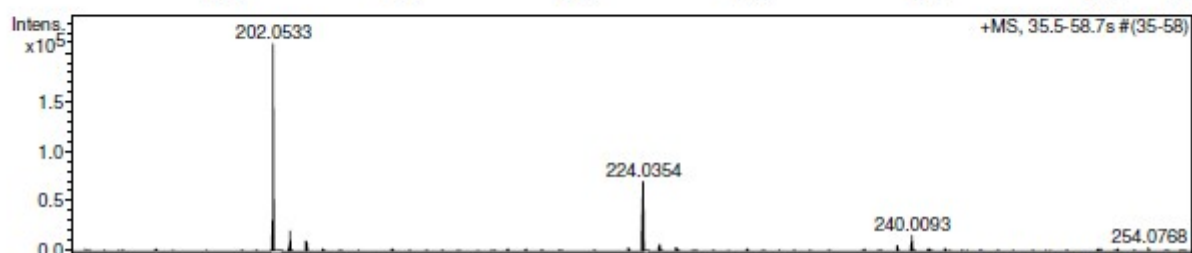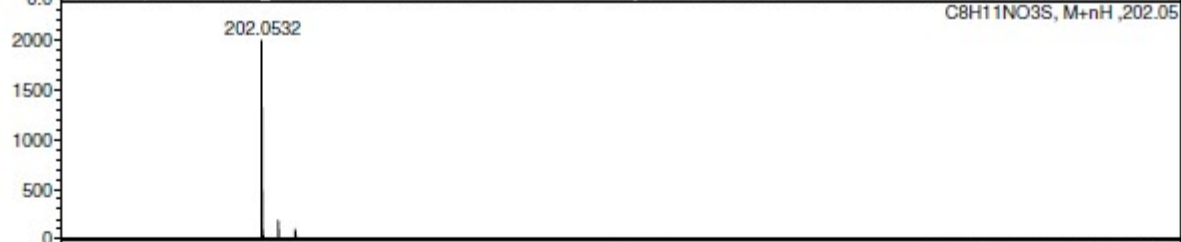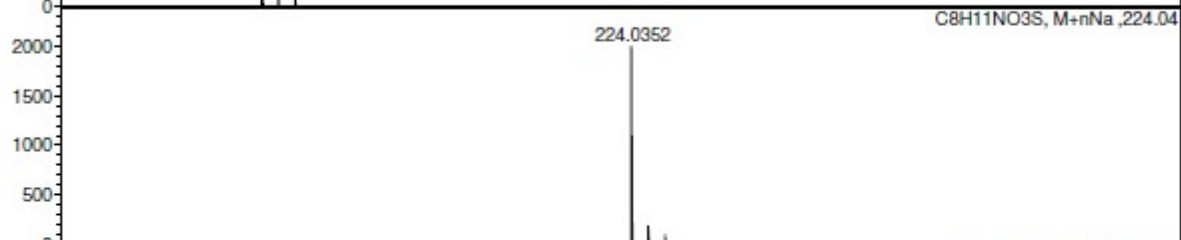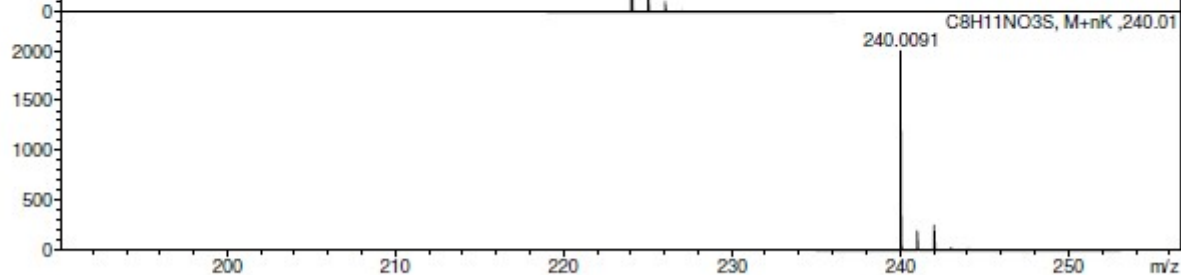

## The control experiment using TEMPO

### Display Report

#### Analysis Info

Analysis Name D:\Data\Kolotyrkina\2023\Mulina\1109004.d  
Method tune\_low.m  
Sample Name /TERN L-241  
Comment C12H23NO2S2 mH278.1242 calibrant added CH3CN

Acquisition Date 09.11.2023 10:44:58

Operator BDAL@DE

Instrument / Ser# microTOF 10248

#### Acquisition Parameter

|             |            |                      |          |                  |           |
|-------------|------------|----------------------|----------|------------------|-----------|
| Source Type | ESI        | Ion Polarity         | Positive | Set Nebulizer    | 0.4 Bar   |
| Focus       | Not active |                      |          | Set Dry Heater   | 180 °C    |
| Scan Begin  | 50 m/z     | Set Capillary        | 4500 V   | Set Dry Gas      | 4.0 l/min |
| Scan End    | 3000 m/z   | Set End Plate Offset | -500 V   | Set Divert Valve | Waste     |

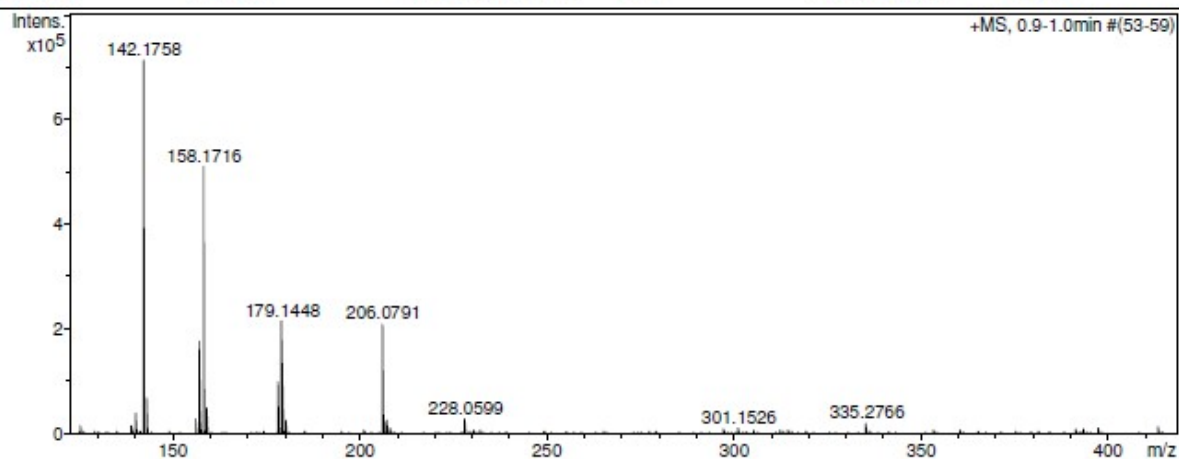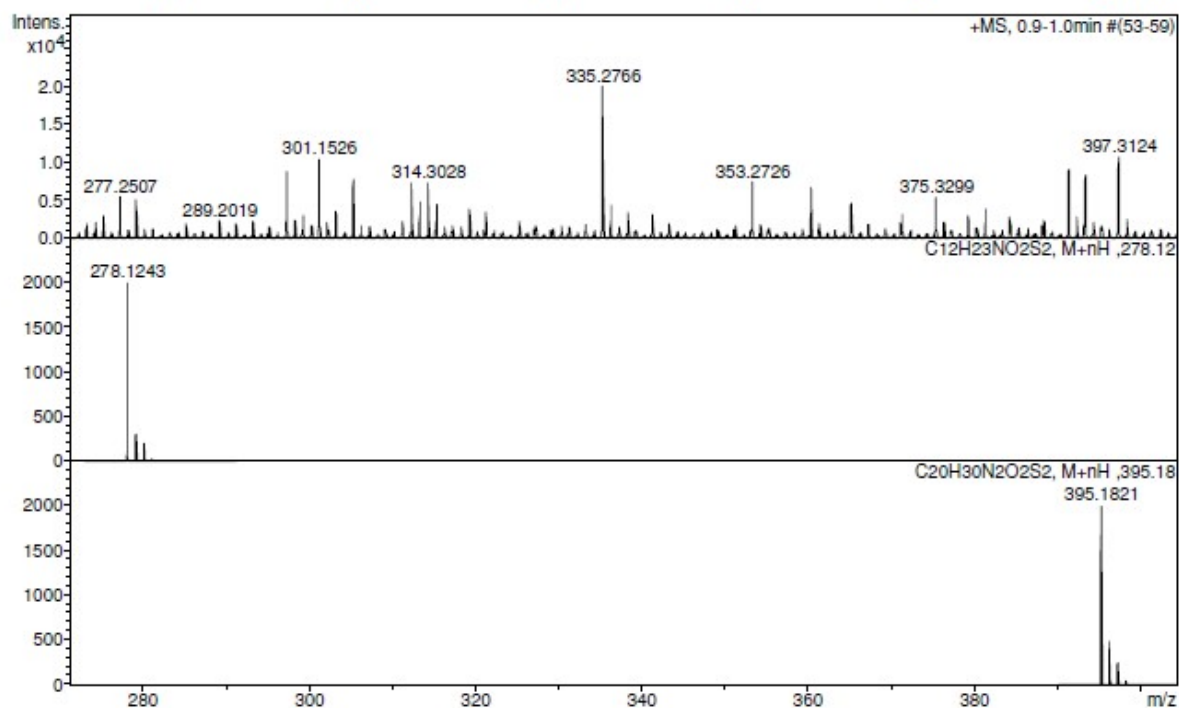

Supplement: d5ob01543j1.pdf [file d5ob01543j1.pdf]
